# Supplementary material for: Semantic Similarity Analysis Reveals Robust Gene-Disease Relationships in Developmental and Epileptic Encephalopathies
Source: PubMed Central journal article supplement — Am J Hum Genet. 2020 Aug 26;107(4):683–97. doi: 10.1016/j.ajhg.2020.08.003 (PMC7536581; doi:10.1016/j.ajhg.2020.08.003), 2020-08-26
Supplement: mmc1.pdf [file mmc1.pdf]

## Supplemental Data

### **Semantic Similarity Analysis Reveals**

### **Robust Gene-Disease Relationships**

### **in Developmental and Epileptic Encephalopathies**

**Peter D. Galer, Shiva Ganesan, David Lewis-Smith, Sarah E. McKeown, Manuela Pendziwiat, Katherine L. Helbig, Colin A. Ellis, Annika Rademacher, Lacey Smith, Annapurna Poduri, Simone Seiffert, Sarah von Spiczak, Hiltrud Muhle, Andreas van Baalen, NCEE Study Group, EPGP Investigators, EuroEPINOMICS-RES Consortium, Genomics Research and Innovation Network, Rhys H. Thomas, Roland Krause, Yvonne Weber, and Ingo Helbig**

# Supplemental Figures

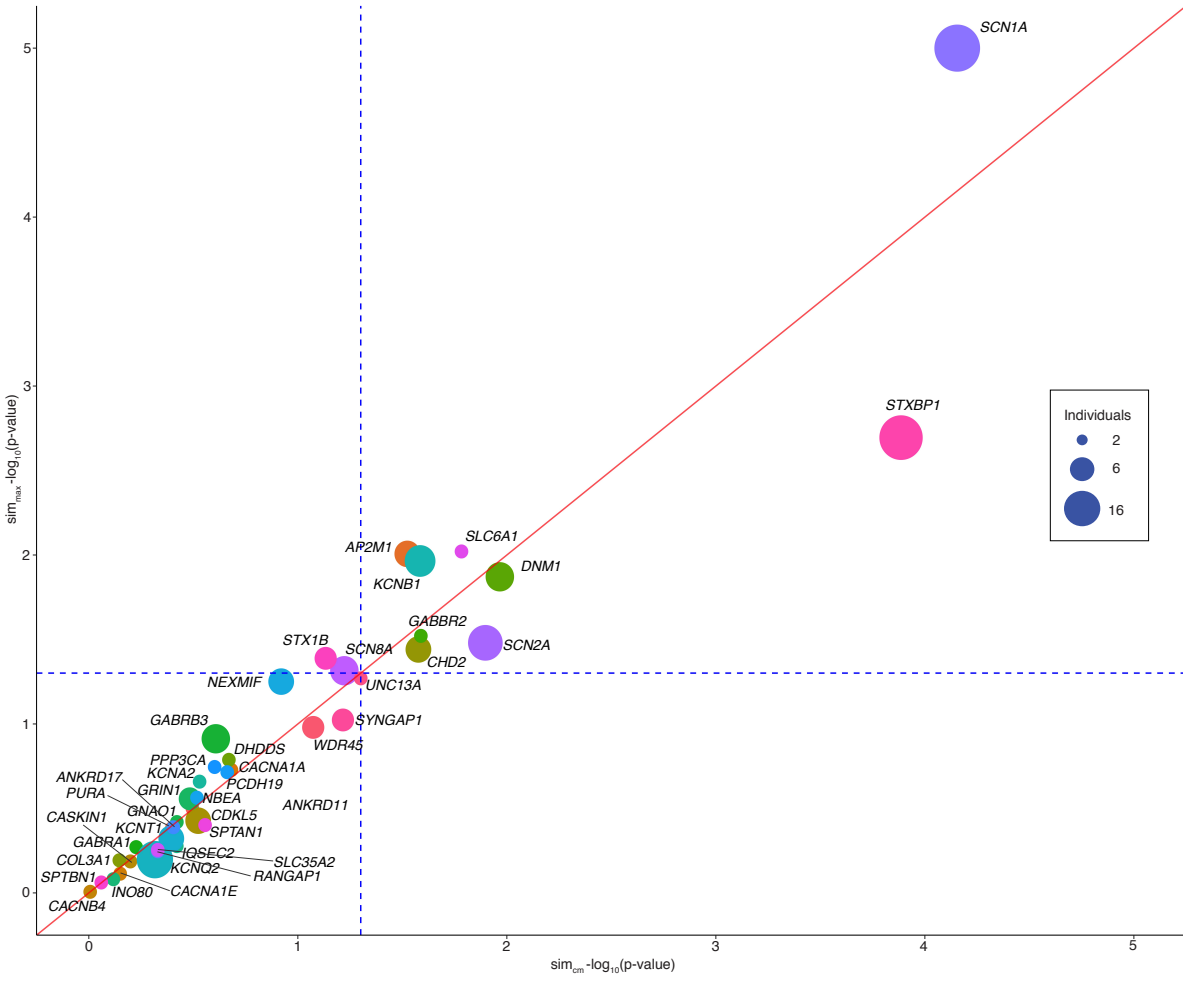

**Figure S1. Comparison between  $sim_{cm}$  and  $sim_{max}$  algorithms**

Gene-specific phenotypic similarity between both algorithms is correlated. Point size signifies the number of individuals with a de novo mutation in a specific gene, blue lines denote the  $-\log_{10}(0.05)$  threshold.

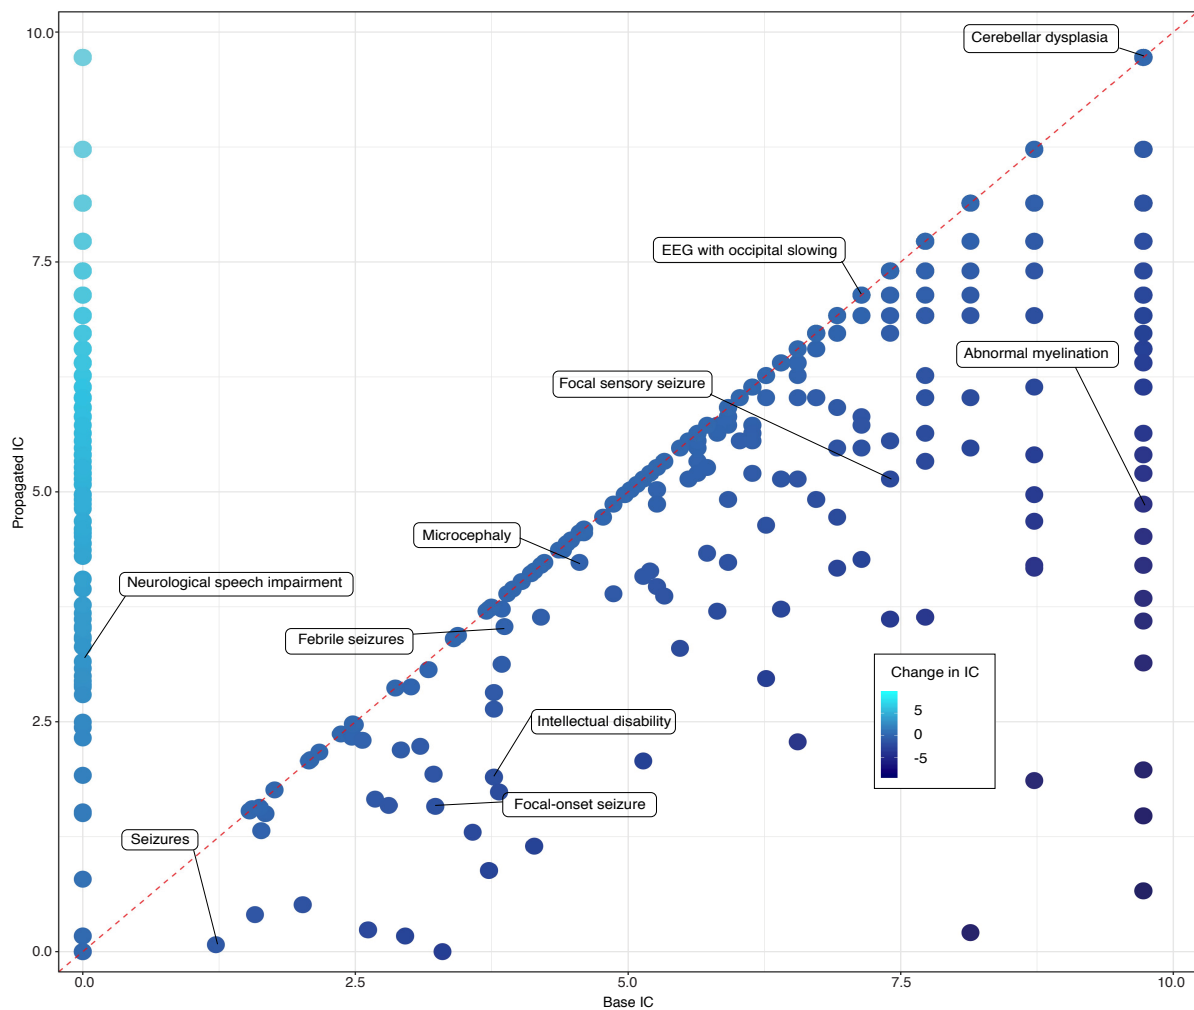

**Figure S2. Information Content (IC) of HPO terms before and after propagation**

Propagation of assigned HPO terms refers to the addition of all higher-level HPO terms within the ontology. The plot compares Information Content (IC) of all HPO terms in the cohort before and after propagation. Since IC is defined as the  $-\log_2$  of the term frequency within the cohort, IC of specific terms after propagation either remains constant or decreases. A decrease in IC is observed if a specific HPO terms becomes more frequent due to the propagation of child terms. In addition, after propagation a significant number of HPO terms are generated that were previously not assigned (see HPO terms with  $x=0$ ). Overall, propagation significantly adjusts the frequency of HPO terms in the cohort, specifically for higher-level terms that are only assigned infrequently and therefore appear artificially rare.

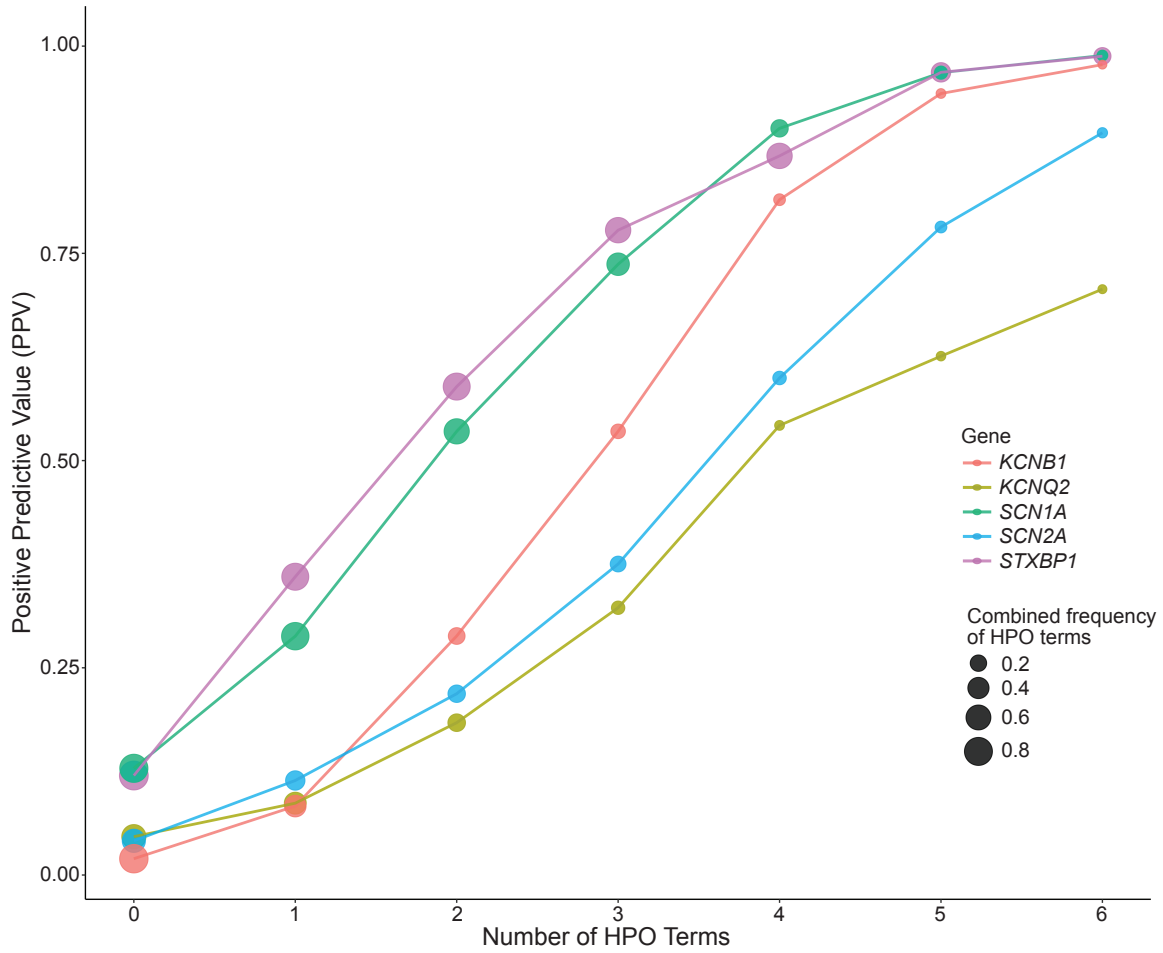

**Figure S3. Growth of positive predictive value (PPV) with the addition of HPO terms**

This figure displays the subsequent growth of the PPV after the addition of HPO terms to the five genetic etiologies with the fastest growth rate. Each color represents a different gene, and the size of the dots indicates the combined frequency of the HPO terms up to that point in that particular gene. *KCNB1*, *SCN1A*, and *STXBP1* require just 5 terms or less to reach a PPV of at least 80%.

Figure S4 A

Phenotree of AP2M1

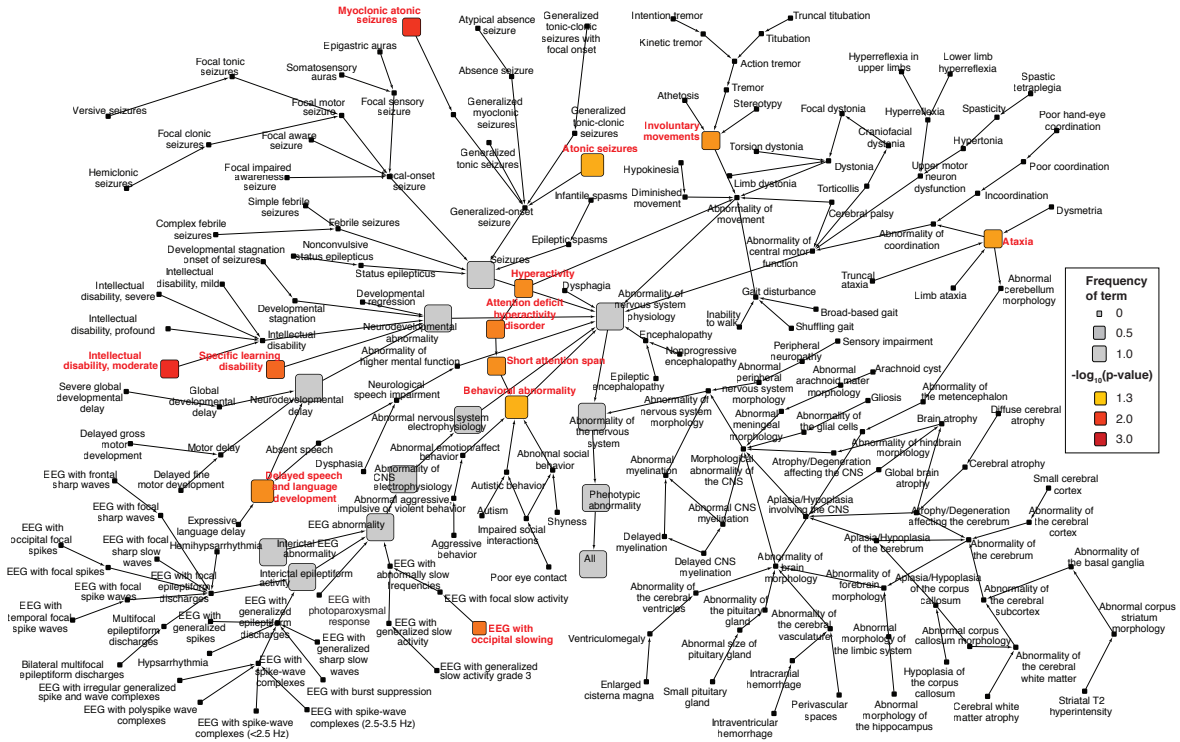

Phenogram of AP2M1

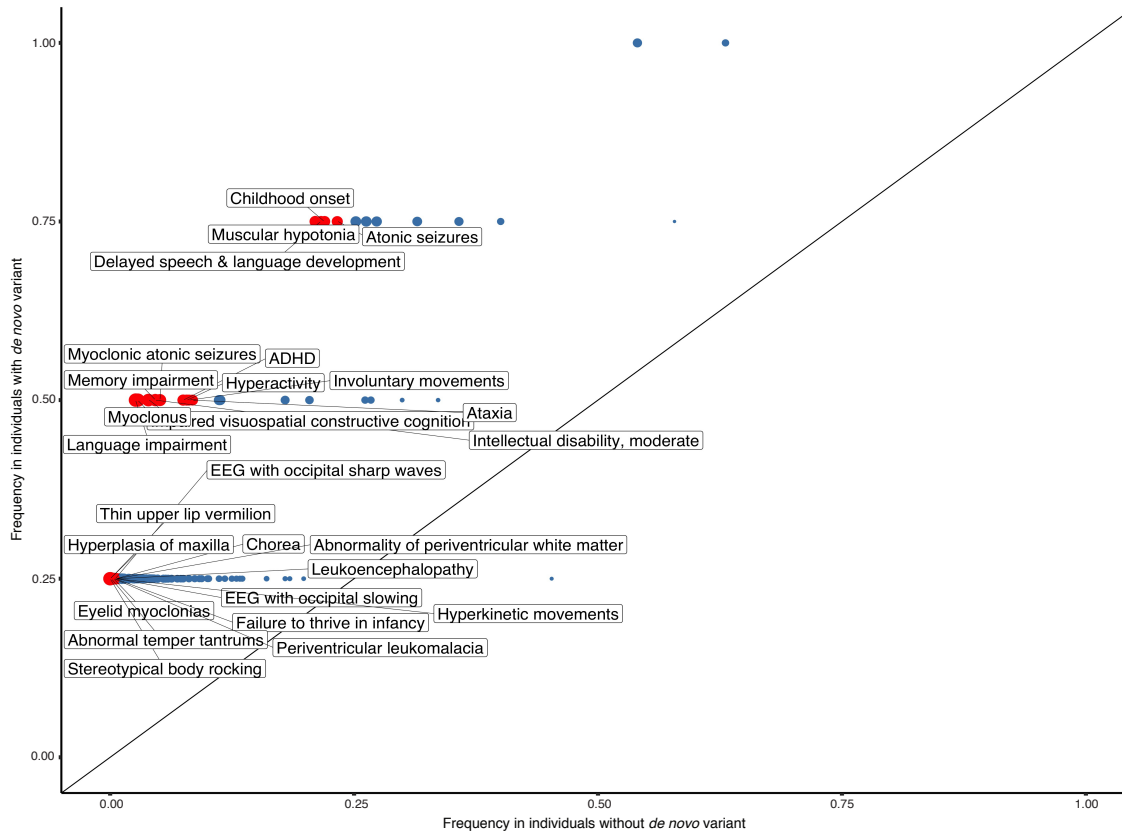

Figure S4 B

Phenotree of *CHD2*

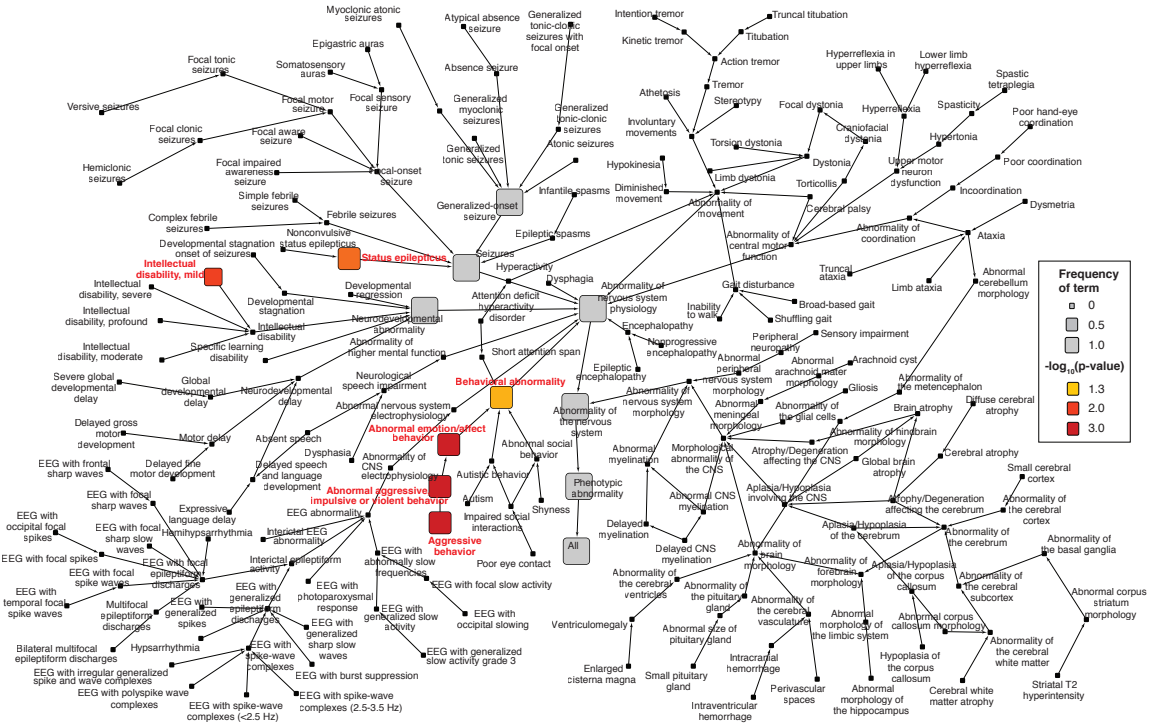

Phenogram of *CHD2*

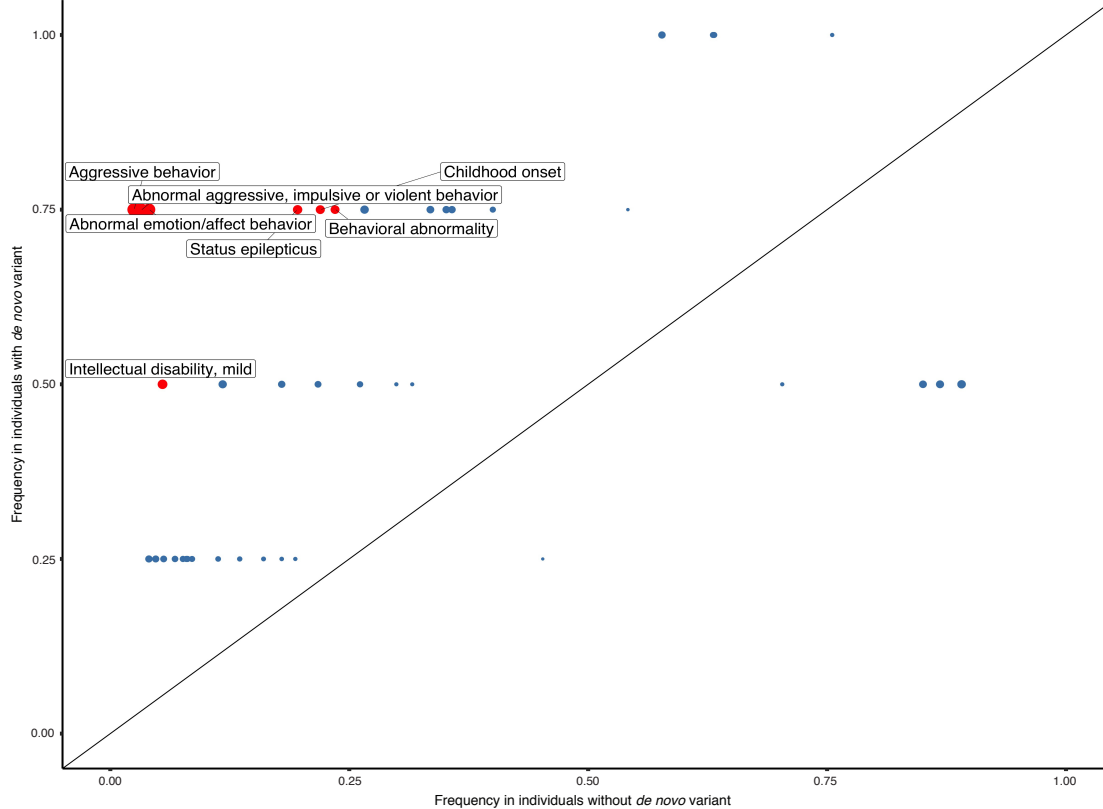



Figure S4 D

Phentree of NEXMIF

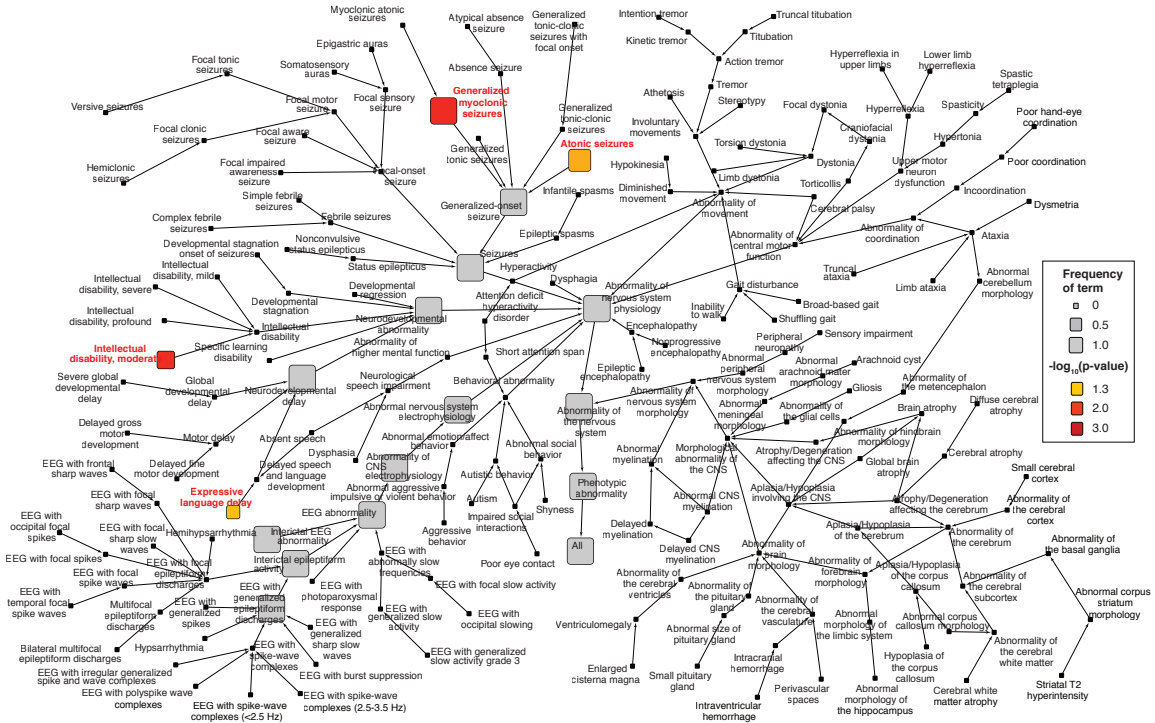

Phenogram of NEXMIF

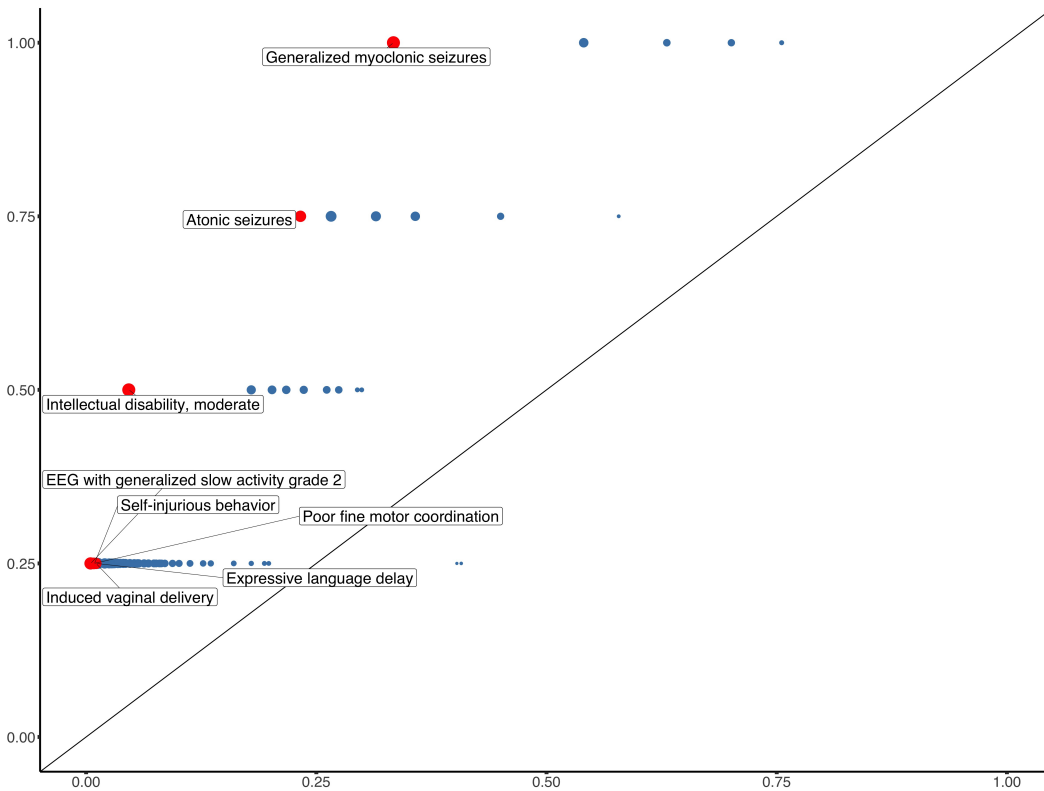







**Figure S4. Phenograms and Phenotrees of six genetic etiologies with 20 de novo variants**

(A)-(F) The graphs display frequencies of HPO terms in AP2M1, DNM1, CHD2, SCN8A, STX1B, and NEXMIF compared to the overall cohort. Red dots indicate significant associations ( $p < 0.05$ ) between HPO terms and specific genes, the size of the dot denotes the degree of significance displayed as  $-\log_{10}(p\text{-value})$ . Significant associations present in 15% of individuals or more with a specific gene are labeled. Parent terms that displayed redundant information were removed.

# Supplemental Note

## Comparison of $\text{sim}_{\text{max}}$ and $\text{sim}_{\text{cm}}$ algorithms

In our study, we used two similarity algorithms to assess the phenotypic relatedness between individuals, the  $\text{sim}_{\text{max}}$  and  $\text{sim}_{\text{cm}}$ . In a previous study, we have used the  $\text{sim}_{\text{max}}$  algorithm to provide evidence for the role of *AP2M1* in human disease. While conceptually related, both algorithms emphasize different features of the HPO and the following hypothetical example demonstrate the emphasis that both algorithms provide to different features in the dataset. For the calculation of Information Content (IC) and similarity, the observed values in our dataset of 846 individuals is used.

### Assignment of HPO terms for two individuals

For our example, we assume that two individuals ( $P_1$ ,  $P_2$ ) are assigned the following HPO terms ([Table S7](#)). The assigned HPO terms are “base” HPO terms, e.g. inclusion of higher-level, ancestral HPO terms through propagation has not yet been performed.

| HPO terms assigned in individual $P_1$                  | HPO terms assigned in individual $P_2$   |
|---------------------------------------------------------|------------------------------------------|
| Focal aware seizure<br>(HP:0002349)                     | Focal-onset seizure<br>(HP:0007359)      |
| Focal clonic seizure<br>(HP:0002266)                    | Neurodevelopmental delay<br>(HP:0012758) |
| Mild global developmental delay (HP:0011342)            |                                          |
| Delayed speech and language development<br>(HP:0000750) |                                          |

**Table S7.** Assigned HPO terms for two hypothetical individuals to demonstrate the differences between the  $\text{sim}_{\text{max}}$  and  $\text{sim}_{\text{cm}}$  algorithms.

## Relative position of HPO terms within the HPO tree

**Figure S5** shows the relative position of the HPO terms within the overall ontological tree. From this illustration, it is apparent that some of the HPO terms assigned to both individuals refer to related concepts within the HPO. For example, “Focal aware seizure” (HP:0002349) and “Focal clonic seizure” (HP:0002266) assigned in individual P<sub>1</sub> are both child terms of “Focal-onset seizure” (HP:0007359) assigned in individual P<sub>2</sub>. It can be seen from **Figure S5** and **Figure S6** that P<sub>1</sub> is assigned more specific terms and that P<sub>2</sub> is assigned higher-level terms.

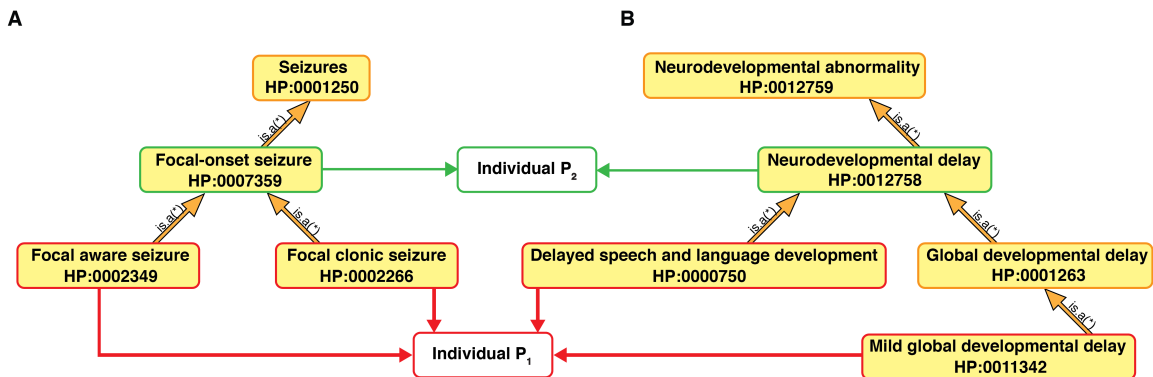

**Figure S5.** Structure of the HPO with two subbranches with superimposed terms that are assigned to both individuals P<sub>1</sub> (red) and P<sub>2</sub> (green).

## Information content for assigned and propagated terms

Based on the structure of the HPO, inclusion of higher-level HPO terms generates a list of extended phenotypic terms for both individuals as shown in **Table S8**. Information Content (IC) is generated as the  $-\log_2$  of the term frequency and the initially assigned (“base”) terms are labelled in red (pat1) and green (pat2). With decreasing specificity of the terms within the structure of the HPO, terms become more frequent and the IC decreases.

| <b>P<sub>1</sub> propagated HPO terms</b>                                | <b>P<sub>2</sub> propagated HPO terms</b>                      |
|--------------------------------------------------------------------------|----------------------------------------------------------------|
| All<br>(HP:0000001; IC=0)                                                | All<br>(HP:0000001; IC=0)                                      |
| Phenotypic abnormality<br>(HP:0000118; IC=0)                             | Phenotypic abnormality<br>(HP:0000118; IC=0)                   |
| Abnormality of the nervous system<br>(HP:0000707; IC=0)                  | Abnormality of the nervous system<br>(HP:0000707; IC=0)        |
| <b>Delayed speech and language development<br/>(HP:0000750; IC=2.19)</b> | Seizures<br>(HP:0001250; IC=0.08)                              |
| Seizures<br>(HP:0001250; IC=0.08)                                        | <b>Focal-onset seizure<br/>(HP:0007359; IC=1.58)</b>           |
| Global developmental delay<br>(HP:0001263; IC=1.32)                      | Abnormality of nervous system physiology<br>(HP:0012638; IC=0) |
| Focal clonic seizures<br>(HP:0002266; IC=3.64)                           | <b>Neurodevelopmental delay<br/>(HP:0012758; IC=0.88)</b>      |
| <b>Focal aware seizure<br/>(HP:0002349; IC=5.55)</b>                     | Neurodevelopmental abnormality<br>(HP:0012759; IC=0.66)        |
| <b>Focal-onset seizure<br/>(HP:0007359; IC=1.58)</b>                     |                                                                |
| Focal motor seizure<br>(HP:0011153; IC=2.64)                             |                                                                |
| <b>Mild global developmental delay<br/>(HP:0011342; IC=5.92)</b>         |                                                                |
| Abnormality of nervous system physiology<br>(HP:0012638; IC=0)           |                                                                |
| Neurodevelopmental delay<br>(HP:0012758; IC=0.88)                        |                                                                |
| Neurodevelopmental abnormality<br>(HP:0012759; IC=0.66)                  |                                                                |

**Table S8.** Propagated HPO terms for both P<sub>1</sub> and P<sub>2</sub> with the initially assigned terms in bold and red (P<sub>1</sub>) or green (P<sub>2</sub>). The highest-level terms in the HPO (“All”; HP:0000001 and Phenotypic abnormality”; HP:0000118) have an Information Content of zero, indicating that these terms are present in all individuals.

## Phenotypic similarity assessed by the $\text{sim}_{\text{max}}$ algorithm

An intuitive way to conceptualize the  $\text{sim}_{\text{max}}$  algorithm is to place the assigned HPO terms for  $P_1$  and  $P_2$  on a 2 x 2 matrix with the rows representing the terms assigned to  $P_1$  and the columns representing the terms assigned to  $P_2$  (Figure S6).

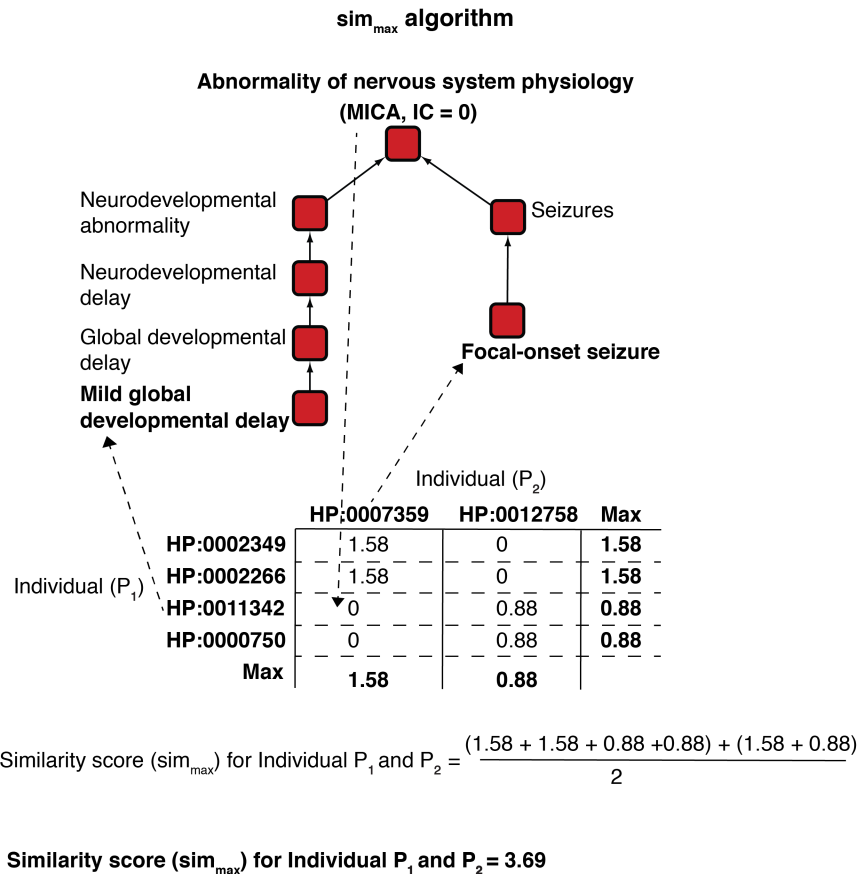

**Figure S6.** Calculating the  $\text{sim}_{\text{max}}$  score for individuals  $P_1$  and  $P_2$  using the assigned phenotypes from Table S7 including “Focal aware seizure” (HP:0002349), “Focal clonic seizure” (HP:0002266), “Mild global developmental delay” (HP:0011342) for  $P_1$ , “Delayed speech and language development” (HP:0000750) and “Focal-onset seizure” (HP:0007359) and “Neurodevelopmental delay” (HP:0012758) for  $P_2$ . The  $\text{sim}_{\text{max}}$  algorithm assesses the Most Informative Common Ancestor (MICA) for each term combination and sums up the row-wise ( $P_1$ ) and column-wise ( $P_2$ ) maxima, thereby determining the similarity of  $P_1 \rightarrow P_2$  and  $P_2 \rightarrow P_1$ . For the final similarity score, both the row-wise and column-wise similarity are averaged.

## Phenotypic similarity assessed by the $\text{sim}_{\text{cm}}$ algorithm

In contrast to determining the MICA for each term combination, the  $\text{sim}_{\text{cm}}$  algorithm assesses the Information Content of all HPO terms shared by  $P_1$  and  $P_2$  using the propagated HPO dataset. This is shown in [Table S9](#), which is derived from [Table S8](#).

| <b>P<sub>1</sub> propagated HPO terms</b>                                | <b>P<sub>2</sub> propagated HPO terms</b>                      | <b>Overlap</b>                                                 |
|--------------------------------------------------------------------------|----------------------------------------------------------------|----------------------------------------------------------------|
| All<br>(HP:0000001; IC=0)                                                | All<br>(HP:0000001; IC=0)                                      | All<br>(HP:0000001; IC=0)                                      |
| Phenotypic abnormality<br>(HP:0000118; IC=0)                             | Phenotypic abnormality<br>(HP:0000118; IC=0)                   | Phenotypic abnormality<br>(HP:0000118; IC=0)                   |
| Abnormality of the nervous system<br>(HP:0000707; IC=0)                  | Abnormality of the nervous system<br>(HP:0000707; IC=0)        | Abnormality of the nervous system<br>(HP:0000707; IC=0)        |
| Delayed speech and language development<br>(HP:0000750; IC=2.19)         |                                                                |                                                                |
| Seizures<br>(HP:0001250; IC=0.08)                                        | Seizures<br>(HP:0001250; IC=0.08)                              | Seizures<br>(HP:0001250; IC=0.08)                              |
| Global developmental delay<br>(HP:0001263; IC=1.32)                      |                                                                |                                                                |
| Focal clonic seizures<br>(HP:0002266; IC=3.64)                           |                                                                |                                                                |
| Focal aware seizure<br>(HP:0002349; IC=5.55)                             |                                                                |                                                                |
| Focal-onset seizure<br>(HP:0007359; IC=1.58)                             | Focal-onset seizure<br>(HP:0007359; IC=1.58)                   | Focal-onset seizure<br>(HP:0007359; IC=1.58)                   |
| Focal motor seizure<br>(HP:0011153; IC=2.64)                             |                                                                |                                                                |
| Mild global developmental delay<br>(HP:0011342; IC=5.92)                 |                                                                |                                                                |
| Abnormality of nervous system physiology<br>(HP:0012638; IC=0)           | Abnormality of nervous system physiology<br>(HP:0012638; IC=0) | Abnormality of nervous system physiology<br>(HP:0012638; IC=0) |
| Neurodevelopmental delay<br>(HP:0012758; IC=0.88)                        | Neurodevelopmental delay<br>(HP:0012758; IC=0.88)              | Neurodevelopmental delay<br>(HP:0012758; IC=0.88)              |
| Neurodevelopmental abnormality<br>(HP:0012759; IC=0.66)                  | Neurodevelopmental abnormality<br>(HP:0012759; IC=0.66)        | Neurodevelopmental abnormality<br>(HP:0012759; IC=0.66)        |
|                                                                          |                                                                |                                                                |
| <b>Total Similarity<br/>(adding IC values for overlapping HPO terms)</b> |                                                                | <b>0 + 0 + 0 + 0.08 + 1.58 + 0<br/>+ 0.88 + 0.66<br/>= 3.2</b> |

**Table S9.** Calculating the  $\text{sim}_{\text{cm}}$  score from the overlap of propagated HPO terms between  $P_1$  and  $P_2$ . Given that both HPO terms initially assigned to  $P_2$  were ancestral terms of the four HPO terms assigned to  $P_1$ , both assigned terms for  $P_2$  are part of the overlapping group of HPO terms. However, as the propagation also includes higher level terms, HPO terms including “Seizures” (HP:0001250; IC=0.08) and “Neurodevelopmental abnormality” (HP:0012759; IC=0.66) contribute to the final score, even though these terms had not been initially assigned. This makes this similarity measure vulnerable to changes in the overall granularity of the HPO within specific sub-branches.



## Factors affecting similarities assessed by the $\text{sim}_{\text{max}}$ and $\text{sim}_{\text{cm}}$ algorithm

### *Effect of annotation density*

In our example,  $P_1$  was assigned two specific focal seizure terms, including “Focal aware seizure” (HP:0002349) and “Focal clonic seizure” (HP:0002266), whereas  $P_2$  was only assigned a single higher-level HPO term for focal seizures, namely “Focal-onset seizure” (HP:0007359). Within the  $\text{sim}_{\text{max}}$  algorithm, both focal seizures types (HP:0002349, HP:0002266) contribute to the overall similarity, whereas the  $\text{sim}_{\text{cm}}$  algorithm would only capture the IC of the more general focal seizure term (HP:0007359). For example, if one specific focal seizure term were to be removed from  $P_1$ ,  $\text{sim}_{\text{max}}$  would decrease, whereas  $\text{sim}_{\text{cm}}$  would remain the same. Likewise, if another specific focal seizure term were to be added,  $\text{sim}_{\text{max}}$  would increase, while  $\text{sim}_{\text{cm}}$  would remain constant. **The  $\text{sim}_{\text{max}}$  algorithm increases similarity with the addition of assigned HPO terms and, as a distinct property from the  $\text{sim}_{\text{cm}}$  algorithm, increases similarity when multiple child terms are annotated.** Accordingly,  $\text{sim}_{\text{max}}$  is affected by the annotation density of the assigned HPO terms, whereas  $\text{sim}_{\text{cm}}$  removes this effect as HPO terms are de-duplicated after propagation and only overlapping ancestral terms are considered.

### *Effect of HPO granularity*

In our example, the  $\text{sim}_{\text{cm}}$  algorithm included higher-level terms in the assessment of similarity that are dependent on the structure of the HPO. The  $\text{sim}_{\text{max}}$  algorithm is in principle independent of the overall structure of the overall ontology, as it only assesses the Information Content of the Most Information Common Ancestors (MICA), independent of how deep these ancestral terms are located within the HPO tree. However, the  $\text{sim}_{\text{cm}}$

algorithm includes the information content of all propagated HPO terms and is therefore dependent on the local of the assigned terms within the HPO structure. For example, if another redundant HPO term would be placed between “Neurodevelopmental delay” (HP:0012758) and “Neurodevelopmental abnormality” (HP:0012759) that is equivalent to “Neurodevelopmental delay” (HP:0012758), this new, redundant term would also have an IC of 0.88. Such a “spacer term” could be introduced based on theoretical considerations on how to structure phenotypes or novel disease classifications suggested by professional organizations that aim at providing a higher granularity for phenotype assignment within the HPO in future studies. However, such a new, interspersed term would increase the overall similarity assessed through the  $sim_{cm}$  algorithm. The results of the  $sim_{max}$  algorithm remain unchanged. Likewise, if a term within the HPO structure is considered redundant and is removed, the  $sim_{cm}$  algorithm would generate a lower similarity. In our example, this would be the hypothetical situation in which “Neurodevelopmental delay” (HP:0012758) and “Neurodevelopmental abnormality” (HP:0012759) are collapsed into a single HPO term. **Accordingly, the  $sim_{cm}$  algorithm is dependent on the overall granularity of the HPO with higher granularity in branches with commonly assigned terms generating higher similarities.** However, the  $sim_{max}$  algorithm is not affected by the granularity of the HPO structure itself.

## Simulating the recognition of Rett Syndrome

In the introduction of our manuscript, we used the clinical recognition of Rett Syndrome in 1954 as an example of how distinct clinical features may significantly stand out sufficiently to be recognized. We attempted to simulate this historical example by adding six hypothetical individuals with Rett Syndrome to our cohort with various combinations of clinical features that include three different scenarios ([Table S10](#)).

| Scenario 1 (n=1 term)                       | Scenario 2 (n=2 terms)                      | Scenario 4 (n=4 terms)                      |
|---------------------------------------------|---------------------------------------------|---------------------------------------------|
| Stereotypical hand wringing<br>(HP:0012171) | Stereotypical hand wringing<br>(HP:0012171) | Stereotypical hand wringing<br>(HP:0012171) |
|                                             | Developmental regression<br>(HP:0002376)    | Developmental regression<br>(HP:0002376)    |
|                                             |                                             | Absent speech<br>(HP:0001344)               |
|                                             |                                             | Apraxia<br>(HP:0002186)                     |

**Table S10.** Combination of HPO terms in simulated individuals with Rett Syndrome. For the similarity analysis, the existing frequencies of these phenotypes in the cohort were used. The phenotype “Stereotypical hand wringing” (HP:0012171) had not been assigned in the cohort and assigned an Information Content of 8.7 for the analysis based on the estimated frequency of 2/846. The IC for “Stereotypical hand wringing” (HP:0012171) was kept constant for n=2, n=4, n=6 patients. For the three other HPO terms (“Developmental regression” HP:0002376, “Absent speech” HP:0001344, “Apraxia” HP:0002186), the existing frequencies in the cohort of 846 individuals was used.

For the simulation, we assessed the combination of one term (Scenario 1), two terms (Scenario 2), and four terms (Scenario 3) in n=2, n=4, and n=6 individuals, using the  $\text{sim}_{\text{max}}$  algorithm. [Table S11](#) shows the results obtained for the nine combinations of HPO term numbers and number of individuals.

| Scenario   | Number of individuals | Number of HPO terms | Median similarity using $sim_{max}$ | p-value      |
|------------|-----------------------|---------------------|-------------------------------------|--------------|
| Scenario 1 | 2                     | 1                   | 8.7                                 | 0.283        |
| Scenario 1 | 2                     | 2                   | 11.6                                | 0.180        |
| Scenario 1 | 2                     | 4                   | 19.9                                | 0.056        |
| Scenario 2 | 4                     | 1                   | 8.7                                 | 0.192        |
| Scenario 2 | 4                     | 2                   | 11.6                                | 0.087        |
| Scenario 2 | 4                     | 4                   | 19.9                                | <b>0.010</b> |
| Scenario 3 | 6                     | 1                   | 8.7                                 | 0.138        |
| Scenario 3 | 6                     | 2                   | 11.6                                | <b>0.045</b> |
| Scenario 3 | 6                     | 4                   | 19.9                                | <b>0.002</b> |

**Table S11.** Simulation of phenotypic similarity for Rett Syndrome using combinations of number of individuals (n=2, n=4, n=6) and number of HPO terms (n=1, n=2, n=4). With increasing number of individuals and HPO terms, the phenotypic similarity between individuals becomes significant.

Examining all combinations of number of individuals and number of terms, we observe that phenotypic significance is achieved once more terms or more individuals are included. For n=6 individuals, the phenotypic similarity is significant for n=2 terms (p=0.05) and n=4 HPO terms (p=0.002). The terms assigned to individuals are “Stereotypical hand wringing” (HP:0012171), “Developmental regression” (HP:0002376), “Absent speech” (HP:0001344), and “Apraxia” (HP:0002186). This hypothetical example highlights that the phenotypic similarity approach used in our study can recapitulate the clinical recognition of specific phenotypes such as Rett Syndrome. Mapping the overall phenotypic similarity onto the overall distribution of median phenotypic similarities in n=6 individuals demonstrates how an increasing number of Rett Syndrome-related HPO terms results in increasing phenotypic similarity that shifts to the right with the addition of more phenotypic terms ([Figures S7](#)).

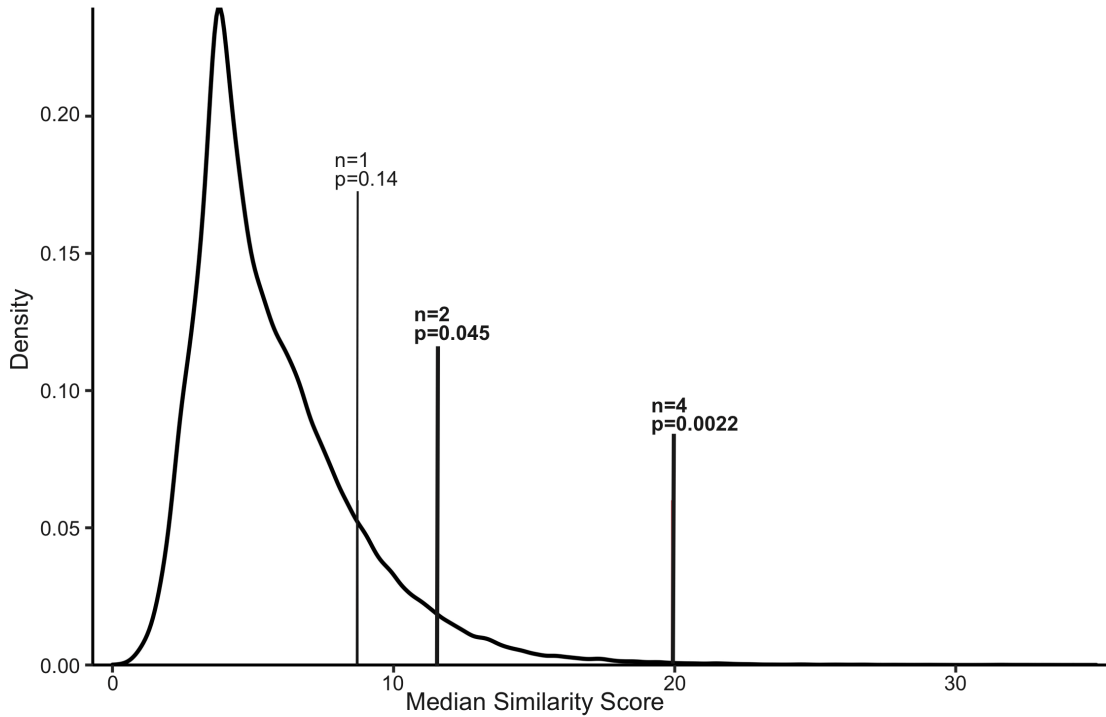

**Figure S7.** Simulation of phenotypic similarity for Rett Syndrome for  $n=6$  individuals with  $n=1$ ,  $n=2$ , and  $n=4$  phenotypic terms. The curve indicates the distribution of median similarity scores for  $n=6$  individuals within the cohort of 846 individuals included in the current study. With increasing number of Rett Syndrome-related HPO terms, the median phenotypic similarity between six simulated individuals with Rett Syndrome increases and moves further to the right of the curve. A p-value of 0.0022 indicates that a median similarity of 19.9 or higher is only observed in 220/100,000 randomly assessed combinations of six individuals in the cohort of 846 individuals, thereby generating an exact p-value of 0.0022. This example highlights the ability of phenotypic similarity approaches to recapitulate historical examples where constellations of phenotypic features were correctly mapped to a common genetic etiology.

| Gene          | PPV  | Terms (n) | Cumulative frequency | Individuals with etiology | HPO ID     | HPO term                                 | Freq. |
|---------------|------|-----------|----------------------|---------------------------|------------|------------------------------------------|-------|
| <b>DNM1</b>   | 0.80 | 4         | 0.41                 | 5                         | HP:0012444 | Brain atrophy                            | 0.80  |
|               |      |           |                      |                           | HP:0007367 | Atrophy/Degeneration affecting the CNS   | 0.80  |
|               |      |           |                      |                           | HP:0002977 | Aplasia/Hypoplasia involving the CNS     | 0.80  |
|               |      |           |                      |                           | HP:0010847 | EEG with spike-wave complexes (<2.5 Hz)  | 0.80  |
| <b>KCNB1</b>  | 0.81 | 5         | 0.07                 | 6                         | HP:0011442 | Abnormality of central motor function    | 0.83  |
|               |      |           |                      |                           | HP:0011443 | Abnormality of coordination              | 0.50  |
|               |      |           |                      |                           | HP:0000729 | Autistic behavior                        | 0.50  |
|               |      |           |                      |                           | HP:0000708 | Behavioral abnormality                   | 0.67  |
| <b>SCN1A</b>  | 0.90 | 5         | 0.23                 | 16                        | HP:0000234 | Abnormality of the head                  | 0.50  |
|               |      |           |                      |                           | HP:0002373 | Febrile seizures                         | 0.81  |
|               |      |           |                      |                           | HP:0002069 | Generalized tonic-clonic seizures        | 0.94  |
|               |      |           |                      |                           | HP:0003593 | Infantile onset                          | 0.81  |
| <b>STXBP1</b> | 0.87 | 5         | 0.63                 | 14                        | HP:0010850 | EEG with spike-wave complexes            | 0.75  |
|               |      |           |                      |                           | HP:0011153 | Focal motor seizure                      | 0.50  |
|               |      |           |                      |                           | HP:0002167 | Neurological speech impairment           | 0.86  |
|               |      |           |                      |                           | HP:0000750 | Delayed speech and language development  | 0.86  |
| <b>AP2M1</b>  | 0.86 | 6         | 0.18                 | 4                         | HP:0001263 | Global developmental delay               | 1.00  |
|               |      |           |                      |                           | HP:0011446 | Abnormality of higher mental function    | 0.86  |
|               |      |           |                      |                           | HP:0012758 | Neurodevelopmental delay                 | 1.00  |
|               |      |           |                      |                           | HP:0001252 | Muscular hypotonia                       | 0.75  |
|               |      |           |                      |                           | HP:0000750 | Delayed speech and language development  | 0.75  |
|               |      |           |                      |                           | HP:0011463 | Childhood onset                          | 0.75  |
| <b>CHD2</b>   | 0.84 | 6         | 0.12                 | 4                         | HP:0010819 | Atonic seizures                          | 0.75  |
|               |      |           |                      |                           | HP:0000708 | Behavioral abnormality                   | 0.75  |
|               |      |           |                      |                           | HP:0003808 | Abnormal muscle tone                     | 0.75  |
|               |      |           |                      |                           | HP:0002133 | Status epilepticus                       | 0.75  |
|               |      |           |                      |                           | HP:0011463 | Childhood onset                          | 0.75  |
| <b>GABRB3</b> | 0.85 | 7         | 0.03                 | 5                         | HP:0000708 | Behavioral abnormality                   | 0.75  |
|               |      |           |                      |                           | HP:0001249 | Intellectual disability                  | 0.75  |
|               |      |           |                      |                           | HP:0002373 | Febrile seizures                         | 0.50  |
|               |      |           |                      |                           | HP:0002123 | Generalized myoclonic seizures           | 0.75  |
|               |      |           |                      |                           | HP:0100022 | Abnormality of movement                  | 0.80  |
|               |      |           |                      |                           | HP:0003593 | Infantile onset                          | 0.80  |
|               |      |           |                      |                           | HP:0010847 | EEG with spike-wave complexes (<2.5 Hz)  | 0.60  |
| <b>KCNT1</b>  | 0.87 | 7         | 0.01                 | 4                         | HP:0000708 | Behavioral abnormality                   | 0.60  |
|               |      |           |                      |                           | HP:0001298 | Encephalopathy                           | 0.40  |
|               |      |           |                      |                           | HP:0001263 | Global developmental delay               | 0.80  |
|               |      |           |                      |                           | HP:0007270 | Atypical absence seizure                 | 0.40  |
|               |      |           |                      |                           | HP:0012444 | Brain atrophy                            | 0.50  |
|               |      |           |                      |                           | HP:0007367 | Atrophy/Degeneration affecting the CNS   | 0.50  |
| <b>SCN2A</b>  | 0.90 | 7         | 0.04                 | 8                         | HP:0007359 | Focal-onset seizure                      | 0.75  |
|               |      |           |                      |                           | HP:0002977 | Aplasia/Hypoplasia involving the CNS     | 0.50  |
|               |      |           |                      |                           | HP:0002060 | Abnormality of the cerebrum              | 0.50  |
|               |      |           |                      |                           | HP:0010841 | Multifocal epileptiform discharges       | 0.50  |
|               |      |           |                      |                           | HP:0100547 | Abnormality of forebrain morphology      | 0.50  |
|               |      |           |                      |                           | HP:0000729 | Autistic behavior                        | 0.50  |
| <b>SCN2A</b>  | 0.90 | 7         | 0.04                 | 8                         | HP:0001252 | Muscular hypotonia                       | 0.62  |
|               |      |           |                      |                           | HP:0002011 | Morphological abnormality of the CNS     | 0.75  |
|               |      |           |                      |                           | HP:0012639 | Abnormality of nervous system morphology | 0.75  |
|               |      |           |                      |                           | HP:0003808 | Abnormal muscle tone                     | 0.62  |
|               |      |           |                      |                           | HP:0011804 | Abnormal muscle physiology               | 0.62  |
| <b>SCN2A</b>  | 0.90 | 7         | 0.04                 | 8                         | HP:0003011 | Abnormality of the musculature           | 0.62  |
|               |      |           |                      |                           | HP:0003011 | Abnormality of the musculature           | 0.62  |

|               |                          |      |      |   |            |                                       |      |
|---------------|--------------------------|------|------|---|------------|---------------------------------------|------|
| <b>SCN8A</b>  | 0.84                     | 7    | 0.14 | 5 | HP:0002069 | Generalized tonic-clonic seizures     | 1.00 |
|               |                          |      |      |   | HP:0003593 | Infantile onset                       | 0.80 |
|               |                          |      |      |   | HP:0007359 | Focal-onset seizure                   | 0.80 |
|               |                          |      |      |   | HP:0002384 | Focal impaired awareness seizure      | 0.60 |
|               |                          |      |      |   | HP:0002133 | Status epilepticus                    | 0.60 |
|               |                          |      |      |   | HP:0001252 | Muscular hypotonia                    | 0.60 |
| <b>CDKL5</b>  | 0.86                     | 8    | 0.04 | 4 | HP:0410280 | Pediatric onset                       | 1.00 |
|               |                          |      |      |   | HP:0011097 | Epileptic spasms                      | 1.00 |
|               |                          |      |      |   | HP:0011196 | EEG with focal sharp waves            | 0.75 |
|               |                          |      |      |   | HP:0003593 | Infantile onset                       | 0.75 |
|               |                          |      |      |   | HP:0002521 | Hypsarrhythmia                        | 0.75 |
|               |                          |      |      |   | HP:0012469 | Infantile spasms                      | 0.75 |
|               |                          |      |      |   | HP:0007270 | Atypical absence seizure              | 0.50 |
|               |                          |      |      |   | HP:0010819 | Atonic seizures                       | 0.50 |
| <b>KCNQ2</b>  | 0.84                     | 8    | 0.01 | 9 | HP:0002121 | Absence seizure                       | 0.50 |
|               |                          |      |      |   | HP:0001298 | Encephalopathy                        | 0.56 |
|               |                          |      |      |   | HP:0001263 | Global developmental delay            | 0.78 |
|               |                          |      |      |   | HP:0010818 | Generalized tonic seizures            | 0.56 |
|               |                          |      |      |   | HP:0001252 | Muscular hypotonia                    | 0.44 |
|               |                          |      |      |   | HP:0000152 | Abnormality of head or neck           | 0.33 |
|               |                          |      |      |   | HP:0012759 | Neurodevelopmental abnormality        | 0.89 |
|               |                          |      |      |   | HP:0012758 | Neurodevelopmental delay              | 0.78 |
| <b>NEXMIF</b> | 0.89                     | 8    | 0.08 | 4 | HP:0001288 | Gait disturbance                      | 0.22 |
|               |                          |      |      |   | HP:0002123 | Generalized myoclonic seizures        | 1.00 |
|               |                          |      |      |   | HP:0010819 | Atonic seizures                       | 0.75 |
|               |                          |      |      |   | HP:0001249 | Intellectual disability               | 0.75 |
|               |                          |      |      |   | HP:0010850 | EEG with spike-wave complexes         | 0.75 |
|               |                          |      |      |   | HP:0012758 | Neurodevelopmental delay              | 1.00 |
|               |                          |      |      |   | HP:0011446 | Abnormality of higher mental function | 0.75 |
| HP:0007270    | Atypical absence seizure | 0.50 |      |   |            |                                       |      |
|               |                          |      |      |   | HP:0011196 | EEG with focal sharp waves            | 0.50 |

**Table S12. HPO terms required to reach a positive predictive value (PPV) of at least 80% for genetic etiologies with more than three individuals in the cohort**

Genetic etiologies with more than three patients in the cohort were found to require 4-8 terms to reach a PPV of at least 80%. HPO terms were selected by taking terms that were had the highest odds ratio (i.e. the most common term within those individuals with the genetic etiology as compared to the rest of the cohort). Frequency of each term within individuals with the genetic etiology is displayed.
