# Supplementary material for: Semantic Similarity Analysis Reveals Robust Gene-Disease Relationships in Developmental and Epileptic Encephalopathies
Source: PubMed Central journal article supplement — Am J Hum Genet. 2020 Aug 26;107(4):683–97. doi: 10.1016/j.ajhg.2020.08.003 (PMC7536581; doi:10.1016/j.ajhg.2020.08.003), 2020-08-26
Supplement: mmc3.pdf [file mmc3.pdf]

# Semantic Similarity Analysis Reveals Robust Gene-Disease Relationships in Developmental and Epileptic Encephalopathies

Peter D. Galer,<sup>1,2,3,14</sup> Shiva Ganesan,<sup>1,2,3,14</sup> David Lewis-Smith,<sup>4,5</sup> Sarah E. McKeown,<sup>1,2</sup> Manuela Pendziwiat,<sup>6</sup> Katherine L. Helbig,<sup>1,2,3</sup> Colin A. Ellis,<sup>2,7</sup> Annika Rademacher,<sup>6</sup> Lacey Smith,<sup>8</sup> Annapurna Poduri,<sup>8,9</sup> Simone Seiffert,<sup>10</sup> Sarah von Spiczak,<sup>6,11</sup> Hiltrud Muhle,<sup>6</sup> Andreas van Baalen,<sup>6</sup> NCEE Study Group, EPGP Investigators, EuroEPINOMICS-RES Consortium, Genomics Research and Innovation Network, Rhys H. Thomas,<sup>4,5</sup> Roland Krause,<sup>12</sup> Yvonne Weber,<sup>10,13</sup> and Ingo Helbig<sup>1,2,3,7,\*</sup>

## Summary

More than 100 genetic etiologies have been identified in developmental and epileptic encephalopathies (DEEs), but correlating genetic findings with clinical features at scale has remained a hurdle because of a lack of frameworks for analyzing heterogeneous clinical data. Here, we analyzed 31,742 Human Phenotype Ontology (HPO) terms in 846 individuals with existing whole-exome trio data and assessed associated clinical features and phenotypic relatedness by using HPO-based semantic similarity analysis for individuals with *de novo* variants in the same gene. Gene-specific phenotypic signatures included associations of *SCN1A* with “complex febrile seizures” (HP: 0011172;  $p = 2.1 \times 10^{-5}$ ) and “focal clonic seizures” (HP: 0002266;  $p = 8.9 \times 10^{-6}$ ), *STXBP1* with “absent speech” (HP: 0001344;  $p = 1.3 \times 10^{-11}$ ), and *SLC6A1* with “EEG with generalized slow activity” (HP: 0010845;  $p = 0.018$ ). Of 41 genes with *de novo* variants in two or more individuals, 11 genes showed significant phenotypic similarity, including *SCN1A* ( $n = 16$ ,  $p < 0.0001$ ), *STXBP1* ( $n = 14$ ,  $p = 0.0021$ ), and *KCNB1* ( $n = 6$ ,  $p = 0.011$ ). Including genetic and phenotypic data of control subjects increased phenotypic similarity for all genetic etiologies, whereas the probability of observing *de novo* variants decreased, emphasizing the conceptual differences between semantic similarity analysis and approaches based on the expected number of *de novo* events. We demonstrate that HPO-based phenotype analysis captures unique profiles for distinct genetic etiologies, reflecting the breadth of the phenotypic spectrum in genetic epilepsies. Semantic similarity can be used to generate statistical evidence for disease causation analogous to the traditional approach of primarily defining disease entities through similar clinical features.

## Introduction

In 1954, Dr. Andreas Rett, a pediatrician in Vienna, Austria, noticed two girls with unusual repetitive hand-washing motions in his waiting room. Rett concluded that these unusual features may be the presentation of a new disease entity and subsequently identified additional girls with similar features and related developmental trajectories. This initial observation laid the foundation for recognizing a neurodevelopmental disorder that came to bear Dr. Rett's name.<sup>1,2</sup> In 1999, *MECP2* (MIM: 300005) was eventually discovered as the causative genetic etiology for Rett syndrome (MIM: 312750), which is thought to affect 1 in 10,000 girls worldwide.<sup>3–5</sup> Similar observations on related clinical features led to discoveries of other genetic neurodevelopmental disorders and childhood developmental and epileptic encephalopathies, including Dravet syndrome

(MIM: 607208) and epilepsy of infancy with migrating focal seizures (MIM: 614959).<sup>6,7</sup>

Although the syndrome-based approach is the time-proven, established method of defining disease entities in the epilepsies, it has several shortcomings that are particularly relevant in the era of large-scale genomics.<sup>8,9</sup> First, the recognition of clinical symptoms is often fortuitous, depending on individuals with shared features to be seen by the same clinician or at the same center. Second, only a subset of clinical syndromes is linked to unique genetic etiologies, whereas many clinical entities, such as infantile spasms or Lennox-Gastaut syndrome, are associated with a wide range of underlying genetic causes.<sup>10–16</sup> Third, the recognition, documentation, and comparison of clinical features is a manual, non-scalable process requiring significant human resources in contrast to the industrial scale of massive parallel sequencing that

<sup>1</sup>Division of Neurology, Children's Hospital of Philadelphia, Philadelphia, PA 19104, USA; <sup>2</sup>The Epilepsy NeuroGenetics Initiative (ENGIN), Children's Hospital of Philadelphia, Philadelphia, PA 19104, USA; <sup>3</sup>Department of Biomedical and Health Informatics (DBHI), Children's Hospital of Philadelphia, Philadelphia, PA 19146, USA; <sup>4</sup>Translational and Clinical Research Institute, Newcastle University, Newcastle-upon-Tyne NE1 7RU, UK; <sup>5</sup>Royal Victoria Infirmary, Newcastle-upon-Tyne NE1 4LP, UK; <sup>6</sup>Department of Neuropediatrics, Christian-Albrechts-University of Kiel, 24105 Kiel, Germany; <sup>7</sup>Department of Neurology, University of Pennsylvania, Philadelphia, PA 19104, USA; <sup>8</sup>Epilepsy Genetics Program, Department of Neurology, Boston Children's Hospital, Boston, MA 02115, USA; <sup>9</sup>Department of Neurology, Harvard Medical School, Boston, MA 02115, USA; <sup>10</sup>Department of Neurology and Epileptology, Hertie Institute for Clinical Brain Research, University of Tübingen, 72076 Tübingen, Germany; <sup>11</sup>DRK-Northern German Epilepsy Centre for Children and Adolescents, 24223 Schwententhal-Raisdorf, Germany; <sup>12</sup>Luxembourg Centre for Systems Biomedicine, University of Luxembourg, 4367 Belvaux, Luxembourg; <sup>13</sup>Department of Epileptology and Neurology, University of Aachen, 52074 Aachen, Germany

<sup>14</sup>These authors contributed equally to this work

\*Correspondence: [helbig@email.chop.edu](mailto:helbig@email.chop.edu)  
<https://doi.org/10.1016/j.ajhg.2020.08.003>

© 2020 The Author(s). This is an open access article under the CC BY-NC-ND license (<http://creativecommons.org/licenses/by-nc-nd/4.0/>).

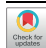

can be performed on DNA from tens of thousands of individuals.<sup>17</sup>

Large collaborative studies that are designed primarily for genetic discovery also collect descriptive clinical data, and these phenotypic data can be exploited for clinical discovery.<sup>18,19</sup> Following the logic of primarily defining disease entities through shared clinical features, we reasoned that applying computational algorithms to available phenotype datasets might detect disease entities by identifying individuals with rare, overlapping phenotypic features that share the same genetic etiology. However, phenotype data is typically sparse and unstructured, which impedes the comparison of clinical features between individuals.

The Human Phenotype Ontology (HPO) is a standardized biomedical representation of the semantic relationships among over 14,000 phenotypic terms with defined relationships, enabling the mapping of heterogeneous clinical features to a common framework.<sup>20–22</sup> Consequently, the value of a phenotypic feature can be weighted on the basis of its position in the ontological tree and frequency in the overall cohort. We and others have previously developed algorithms to identify individuals with significant phenotypic similarities on the basis of HPO terms within patient cohorts.<sup>18,23</sup>

Here, we translated clinical findings in 846 individuals with developmental and epileptic encephalopathies (DEEs) with available trio whole-exome data to 31,742 HPO terms. We then assessed whether individuals with *de novo* variants in the same genetic etiology had phenotypic features that were more similar than expected by chance and identified 11 genetic etiologies with significant phenotypic similarity. Our results demonstrate that phenotype data in HPO format represents a valuable resource in providing statistical evidence in gene-disease relationships and reconstructs meaningful disease patterns from sparse clinical data.

## Material and Methods

### Participant Recruitment

Clinical and phenotypic data included in this study were derived through local studies and data obtained through dbGaP (dbGaP Study Accession: phs000653.v1.p1,  $n = 335$ ). For local cohorts, informed consent for participation in this study was obtained from parents of all probands in agreement with the Declaration of Helsinki and completed per protocol with local approval by the respective institutional review boards (IRBs). These cohorts included individuals from the EuroEPINOMICS-RES cohort (RES,  $n = 319$ ), Epi4K cohort (EPGP,  $n = 335$ ), and a cohort of individuals recruited through the Epilepsy Genetics Research Project at the Children's Hospital of Philadelphia (EGRP,  $n = 192$ ). A sub-cohort of 320 individuals from the RES and EGRP populations were included in a previous study.<sup>18</sup> Phenotypes for these cohorts were collected through standardized phenotyping and questionnaires to physicians and healthcare providers. Description of the recruitment and phenotyping of the Epi4K dbGaP cohort (phs000653.v1.p1) has been reported previously.<sup>24,25</sup>

### Translation to HPO Terms, Information Content (IC)

For the various phenotyping forms and databases provided for the individuals included in this project, we manually generated dictionaries to map phenotyping terms to HPO terms (HPO version 1.2; release format-version: 1.2; data-version: releases/2019-11-08; downloaded on 1/23/20). The phenotype of each individual from the EGRP dataset was manually coded by expert reviewers. Phenotypes were first extracted by research staff with clinical and biomedical knowledge and experience with the HPO by using all available clinical and research notes for an individual and by using the most specific HPO terms applicable. These assigned terms were then reviewed and verified by domain experts in the field of epilepsy, i.e., either epilepsy genetic counselors or specialist physicians. In cases of ambiguity and uncertainty, the higher level HPO term was coded (e.g., if autism spectrum disorder was not clearly diagnosed but mentioned, we assigned the higher level “autistic behavior” [HP: 0000729]).

For each individual, all higher-level (ancestral) HPO terms were derived, followed by de-duplication of HPO terms for each individual. We refer to this method as “propagation,” resulting in a base and propagated set of HPO terms for each individual. The propagated HPO dataset from the entire cohort was used to generate baseline frequencies  $f$  for all HPO terms. Information content (IC) of each term was defined as the  $-\log_2(f)$  with a higher IC value, reflecting a more specific and less frequently encountered HPO term in the cohort. In the current manuscript, we use a compact internationalized resource identifier (CURIE) to refer to HPO terms, i.e., “HP: 0001250” (“seizures”) abbreviates “<https://hpo.jax.org/app/browse/term/HP:0001250>” in accordance with the Open Biological and Biomedical Ontologies (OBO) Citation and Attribution Policy.

### Genetic Analysis

Trio-based whole-exome sequencing was performed as previously described,<sup>18,26</sup> including research sequencing within the EuroEPINOMICS-RES project ( $n = 335$ ) performed at the Wellcome Trust Sanger Institute (Hinxton, UK) with the Illumina TruSeq DNA Sample Preparation Kit, the Agilent Technologies SureSelect Human All Exon 50 Mb Kit, and the Illumina HiSeq2000 per manufacturer's protocols;<sup>11,26,27</sup> research sequencing at the Institute of Clinical Molecular Biology at the University of Kiel and the Cologne Center for Genomics with NimbleGen SeqCap EZ Human Exome Library v2.0, Nextera Rapid Capture Exome, Nextera Rapid Capture Expanded Exome, Agilent SureSelect Human All Exon V5, and Agilent SureSelect Human All Exon 50 Mb; research sequencing at the Broad Institute with Nextera Rapid Capture Exome kit; sequencing in a diagnostic setting at GeneDx ( $n = 69$ ) with SureSelect Human All Exon V4 (50Mb) kit; and sequencing at the Division of Genomic Diagnostics at the Children's Hospital of Philadelphia ( $n = 49$ ) with SureSelect Clinical Research Exome kits.

All genetic data on individuals included in the overall cohort were re-analyzed via a standardized pipeline as previously described.<sup>18,26</sup> The Burrows Wheeler Alignment (v 0.7.12) MEM algorithm was used to align the raw data to the HS37d5 human reference genome, and Samblaster (v 0.1.20) was used to add mate tags (MC and MQ) to the paired-end lines. Base quality score recalibration (BQSR) was performed with GATK tools (v4.0.0.0), followed by SNP and indel calling via HaplotypeCaller with interval lists specific to the exome enrichment kit used for each sample. GVCF files for each trio were combined with PICARD tools

(v2.0.1), and genotyping was performed with the GATK genotype GVCF tool. GATK tools was used for variant selection and filtration, and the PICARD tools MergeVcfs functionality was used to generate merged variant files (VCFs). A customized version of ANNOVAR was used to annotate the VCF file. *De novo*, homozygous, and compound heterozygous variants were derived from the annotated file. The following quality criteria were used for variant filtration: (1) read depth in proband and parents  $\geq 10\times$ ; (2) genotype quality in proband and parents  $\geq 20$ , (3) absent in all population databases including 1000G, EVS, and ExAC, (4) RVIS percentile  $< 70$ , and (5) read ratio  $\geq 0.25$  and  $\leq 0.75$  of the alternate alleles in the proband. All *de novo* variants were visually inspected with the Integrative Genomics Viewer (IGV, 2.4.14), and a subset of genes were excluded due to inconsistency of calls. A subset of *de novo* variants was validated via Sanger sequencing in previous studies, confirmed clinically, or had been reported as causative genetic etiologies by diagnostic laboratories.<sup>10,11,18</sup> The probability of *n de novo* variants in a given gene was determined with “denovolyzer.”<sup>28</sup>

### Phenotypic Similarity Analysis

We used two similarity measures to determine phenotypic similarity (sim score): the previously reported  $\text{sim}_{\text{max}}$  algorithm<sup>18</sup> and a novel  $\text{sim}_{\text{cm}}$  algorithm (Figure S1). The  $\text{sim}_{\text{max}}$  was used as the primary algorithm for this study. The basic concept of both phenotypic similarity algorithms is the generation of symmetric phenotypic similarity scores between two individuals on the basis of the similarity between the phenotypic concepts represented by their HPO terms. The greater the similarity score, the more similar the individuals’ phenotypes. This similarity score of a pair of individuals is derived from the summation of the IC of the most informative common ancestor (MICA) terms of all pairwise comparisons of the base HPO terms of the two individuals.<sup>29</sup>

$$\text{sim}_{\text{max}}(P_1, P_2) = \frac{1}{2} \left( \sum_{i=1}^m \max_{i \leq j \leq n} S_{ij} + \sum_{j=1}^n \max_{i \leq i \leq m} S_{ji} \right).$$

(Equation 1)

A matrix is formed with the  $m$  base HPO terms,  $i$  of individual  $P_1$  as rows, and the  $n$  base HPO terms,  $j$  of individual  $P_2$  as columns. Each  $s_{ij}$  corresponds to the IC of the MICA of HPO terms  $i$  and  $j$ , that is the maximum information content within the set of propagated terms shared by  $i$  and  $j$ . In summary, the  $\text{sim}_{\text{max}}$  algorithm sums over all rows and columns of a matrix that holds all base HPO terms in individual  $P_1$  ( $n$  terms as rows) and all HPO terms in individual  $P_2$  ( $m$  terms as columns; Equation 1).

The faster  $\text{sim}_{\text{cm}}$  algorithm operates on the propagated HPO terms of each individual and determines the intersect of propagated HPO terms between individual  $P_1$  and individual  $P_2$ , summing up the IC of all ancestral HPO terms shared by both individuals. All computations were performed with the R Statistical Package.<sup>30</sup>

Although more computationally costly, this study used  $\text{sim}_{\text{max}}$  as the primary similarity measure because this algorithm has been successfully utilized previously.<sup>18</sup> However, results from both similarity measures are highly correlated (Figure S1).

### Expected Phenotypic Similarity Score per Gene

All genetic etiologies with *de novo* variants in two or more individuals were included in the primary analysis. The expected phenotypic similarity per gene with  $n$  individuals was determined by comparing distribution of the median similarities of  $n$  individuals

that were randomly selected with 100,000 permutations from the overall cohort, resulting in an exact p value via the comparison of observed versus expected phenotypic similarity. For example, only 10 out of 100,000 permutations of 16 randomly selected individuals showed a median sim score that was greater than or equal to the observed median phenotypic similarity in the 16 individuals with *de novo* variants in *SCN1A* (MIM: 182389), resulting in an exact p value of  $< 1.0 \times 10^{-5}$  for *SCN1A* (median sim score = 17.69).

### Phenograms and Analysis of Gene-Specific Phenotypic Signals

For each genetic etiology, the frequency of all assigned and derived (propagated) HPO terms in patients was identified and compared to the frequency in individuals without the genetic etiology deriving a p value via Fisher’s tests. We refer to the display of these frequencies as “phenograms,” which provide a visual intuition of the phenotypic spectrum of each disease. Phenograms were generated for all genes included in the analysis. We compiled p values by comparing the observed versus expected contribution for all HPO terms across all genes.

### Assessment of Positive Predictive Value of HPO Term Combinations

In order to assess the predictive power of the combination of HPO terms for the presence of a specific genetic etiology, we selected HPO terms associated with each genetic etiology that were more frequent in gene-positive individuals compared to gene-negative individuals by using the propagated HPO dataset. “Gene-positive individuals” refers to individuals with *de novo* variants in a given genetic etiology, whereas “gene-negative individuals” refers to individuals without *de novo* variants in a given genetic etiology. We then selected HPOs present in at least 10% of individuals of gene-negative individuals to prevent the effect of very rare HPO terms. We then used HPO term frequency in gene-positive and gene-negative individuals to assess the combined frequency of  $n$  HPO terms. For example, if three HPO terms have a frequency of 0.9, 0.85, and 0.7, the combined frequency would be  $0.9 \times 0.85 \times 0.7 = 0.54$ . Ranking HPO terms by strength of association with a given genetic etiology, we then assessed the positive predictive value (PPV) of the combination of HPO terms when successively including additional HPO terms. We used this method to determine the number of HPO terms needed for a PPV of 0.8.

## Results

### Phenotypic Information Translated to HPO Is Sparse with a Wide Range of Phenotypic Depth

After translation to HPO terms, the 846 individuals included in the study were coded with a total of 31,742 HPO terms, including 1,616 unique HPO terms. The overall number of HPO terms differed widely between individuals, ranging from 12 terms to 181 terms with a median of 30 terms per individual. The cohorts included in the study showed significant differences: the Epi4K cohort (median of 22 terms) demonstrated a lower number of HPO terms per individual than the remaining cohort (median of 38 terms). The distribution of HPO terms in the cohort was sparse: only 29 terms were present in 100 or more

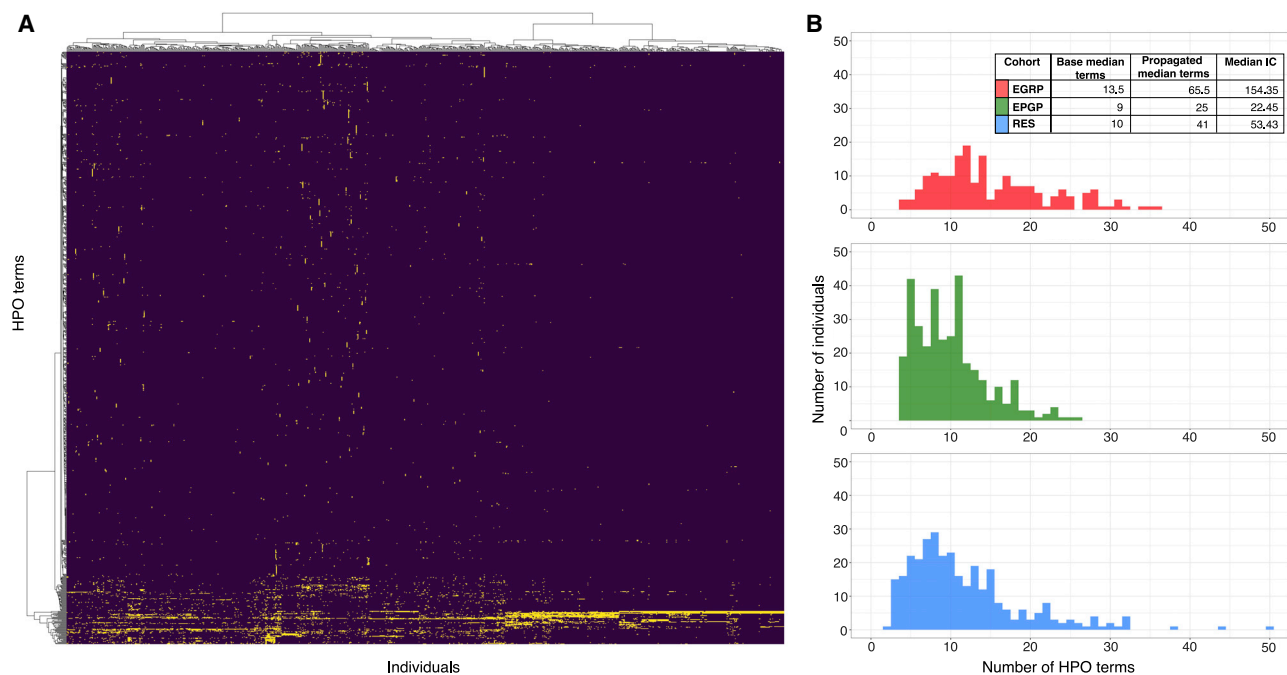

**Figure 1. Heterogeneous Distribution of HPO Terms**

(A) Heatmap of all 846 individuals in the cohort with all 31,742 HPO terms. A yellow dot signifies that an HPO term is present in an individual. The heatmap displays the overall sparsity and heterogeneity of the cohort and indicates that only a small subset of the 1,616 unique HPO terms are shared between individuals.

(B) Distributions of number of HPO terms per patient in the three sub-cohorts (EGRP, EPGP/Epi4K, and EuroEPINOMICS-RES), indicating the varying depth of phenotyping across these cohorts. Base terms refer to the explicitly assigned terms in each cohort, and propagated terms refer to the assigned terms including all higher-level terms in the ontology.

individuals (Figure 1). “Seizures” (HP: 0001250), “infantile spasms” (HP: 0012469), and “hypsarrhythmia” (HP: 0002521) were the most common explicitly assigned HPO terms. Only 15% of all HPO terms were found in two or more individuals, and 50.1% of all HPO terms were only coded in a single individual.

### Propagation of HPO Terms Enables an Accurate Assessment of Term Frequencies

Because HPO terms are interrelated within the tree-like structure of the HPO, assessing the baseline frequency of HPO terms provides a misleading estimate of the general frequencies of disease features in the cohort. For example, the higher-level term “neurodevelopmental abnormality” (HP: 0012759) was coded as an explicit term in only one individual. However, a much greater number of individuals had developmental differences consistent with “neurodevelopmental abnormality” (HP: 0012759) but had been assigned more specific terms. For example, “global developmental delay” (HP: 0001263) was coded in 272 individuals and “intellectual disability” (HP: 0001249) was coded in 62 individuals. We therefore generated the true frequency of all HPO terms by a process we referred to as “propagation.” In brief, for each individual, all higher-level HPO terms were added for the baseline HPO terms assigned to each individual, followed by de-duplication of HPO terms per individual. This method ensures that each indi-

vidual coded with “global developmental delay” (HP: 0001263) was also coded with all higher-level, less specific ancestral terms, including “neurodevelopmental abnormality” (HP: 0012759) and “abnormality of the nervous system” (HP: 0012638). The propagated HPO terms allow for a meaningful estimate of the frequencies of clinical features in the cohort (Table S4). The frequencies of high-level HPO terms were particularly affected by the propagation (Figure S2), indicating that estimates derived from baseline HPO terms generally underestimate the frequency of higher-level, less specific terms for phenotypic features. In brief, when we used the propagated HPO terms, 803/846 individuals had seizures (HP: 0001250 and child terms), 227/846 had intellectual disability (HP: 0001249 and child terms), 254/846 had movement disorders or “abnormality of central motor function” (HP: 0011442 and child terms), and 97/846 individuals had autistic behavior (HP: 0000729 and child terms).

### Genetic Analysis Identifies 41 Genetic Etiologies Shared by Two or More Individuals

Using a standardized pipeline across all samples for variant calling, annotation, and inheritance models, we identified 41 genetic etiologies with *de novo* variants in two or more individuals (Table S6). The most common genetic etiologies in our cohort were *SCN1A* (n = 16), *STXBPI* (MIM: 602926) (n = 14), *KCNQ2* (MIM: 602235) (n = 9), *SCN2A*

| Gene           | Cohort<br>(number of individuals) |      |     | P-value<br><i>de novo</i> | Phenotype |       |      | P-value<br>phenotype | Variant |     |                |
|----------------|-----------------------------------|------|-----|---------------------------|-----------|-------|------|----------------------|---------|-----|----------------|
|                | EGRP                              | EPGP | RES |                           | DD        | Focal | Gen. |                      | Miss.   | PTV |                |
| <b>SCN1A</b>   | 0                                 | 8    | 8   | 1.36 x 10 <sup>-41</sup>  | 10        | 11    | 16   | < 10 <sup>-5</sup>   | 6       | 10  | <b>SCN1A</b>   |
| <b>STXBP1</b>  | 9                                 | 5    | 0   | 1.31 x 10 <sup>-41</sup>  | 13        | 1     | 6    | 0.00206              | 8       | 6   | <b>STXBP1</b>  |
| <b>SLC6A1</b>  | 2                                 | 0    | 0   | 1.85 x 10 <sup>-5</sup>   | 1         | 0     | 2    | 0.00937              | 1       | 1   | <b>SLC6A1</b>  |
| <b>AP2M1</b>   | 2                                 | 0    | 2   | 4.02 x 10 <sup>-11</sup>  | 4         | 1     | 3    | 0.01026              | 4       | 0   | <b>AP2M1</b>   |
| <b>KCNB1</b>   | 3                                 | 1    | 2   | 9.12 x 10 <sup>-16</sup>  | 4         | 4     | 5    | 0.01094              | 5       | 1   | <b>KCNB1</b>   |
| <b>DNM1</b>    | 2                                 | 2    | 2   | 9.69 x 10 <sup>-13</sup>  | 4         | 2     | 6    | 0.01347              | 6       | 0   | <b>DNM1</b>    |
| <b>GABBR2</b>  | 0                                 | 0    | 2   | 5.54 x 10 <sup>-5</sup>   | 2         | 2     | 1    | 0.02969              | 2       | 0   | <b>GABBR2</b>  |
| <b>SCN2A</b>   | 3                                 | 3    | 2   | 3.41 x 10 <sup>-19</sup>  | 7         | 3     | 6    | 0.03297              | 6       | 2   | <b>SCN2A</b>   |
| <b>CHD2</b>    | 0                                 | 1    | 3   | 3.57 x 10 <sup>-12</sup>  | 3         | 1     | 4    | 0.03697              | 0       | 4   | <b>CHD2</b>    |
| <b>STX1B</b>   | 1                                 | 1    | 1   | 7.15 x 10 <sup>-9</sup>   | 2         | 0     | 2    | 0.04076              | 2       | 1   | <b>STX1B</b>   |
| <b>SCN8A</b>   | 1                                 | 2    | 2   | 1.54 x 10 <sup>-11</sup>  | 4         | 4     | 5    | 0.04754              | 5       | 0   | <b>SCN8A</b>   |
| <b>UNC13A</b>  | 2                                 | 0    | 0   | 1.35 x 10 <sup>-4</sup>   | 2         | 2     | 0    | 0.05272              | 2       | 0   | <b>UNC13A</b>  |
| <b>NEXMIF</b>  | 1                                 | 1    | 2   | 1.13 x 10 <sup>-14</sup>  | 4         | 1     | 4    | 0.05594              | 0       | 4   | <b>NEXMIF</b>  |
| <b>SYNGAP1</b> | 0                                 | 0    | 3   | 2.48 x 10 <sup>-10</sup>  | 2         | 0     | 3    | 0.09526              | 0       | 3   | <b>SYNGAP1</b> |
| <b>WDR45</b>   | 1                                 | 1    | 1   | 1.63 x 10 <sup>-11</sup>  | 3         | 2     | 2    | 0.10564              | 0       | 3   | <b>WDR45</b>   |
| <b>GABRB3</b>  | 1                                 | 4    | 0   | 2.16 x 10 <sup>-14</sup>  | 4         | 1     | 4    | 0.12113              | 5       | 0   | <b>GABRB3</b>  |
| <b>DHDDS</b>   | 0                                 | 1    | 1   | 7.25 x 10 <sup>-6</sup>   | 1         | 0     | 2    | 0.16456              | 2       | 0   | <b>DHDDS</b>   |
| <b>PPP3CA</b>  | 1                                 | 1    | 0   | 1.29 x 10 <sup>-5</sup>   | 1         | 0     | 2    | 0.18136              | 1       | 1   | <b>PPP3CA</b>  |
| <b>CACNA1A</b> | 1                                 | 1    | 0   | 3.21 x 10 <sup>-4</sup>   | 2         | 1     | 1    | 0.18909              | 2       | 0   | <b>CACNA1A</b> |
| <b>PCDH19</b>  | 2                                 | 0    | 1   | 1.03 x 10 <sup>-4</sup>   | 3         | 2     | 3    | 0.19477              | 2       | 1   | <b>PCDH19</b>  |
| <b>KCNA2</b>   | 1                                 | 0    | 1   | 9.73 x 10 <sup>-6</sup>   | 2         | 1     | 2    | 0.22159              | 1       | 1   | <b>KCNA2</b>   |
| <b>GRIN1</b>   | 0                                 | 1    | 1   | 3.17 x 10 <sup>-7</sup>   | 1         | 1     | 2    | 0.27431              | 0       | 2   | <b>GRIN1</b>   |
| <b>NBEA</b>    | 2                                 | 1    | 0   | 3.75 x 10 <sup>-6</sup>   | 3         | 1     | 2    | 0.27532              | 3       | 0   | <b>NBEA</b>    |
| <b>ANKRD11</b> | 0                                 | 0    | 2   | 4.91 x 10 <sup>-4</sup>   | 1         | 0     | 2    | 0.32006              | 1       | 1   | <b>ANKRD11</b> |
| <b>CDKL5</b>   | 0                                 | 3    | 1   | 3.28 x 10 <sup>-10</sup>  | 1         | 1     | 3    | 0.37592              | 2       | 2   | <b>CDKL5</b>   |
| <b>GNAO1</b>   | 0                                 | 1    | 1   | 8.88 x 10 <sup>-6</sup>   | 1         | 1     | 1    | 0.38395              | 2       | 0   | <b>GNAO1</b>   |
| <b>SPTAN1</b>  | 2                                 | 0    | 0   | 3.93 x 10 <sup>-4</sup>   | 1         | 0     | 1    | 0.39997              | 2       | 0   | <b>SPTAN1</b>  |
| <b>PURA</b>    | 1                                 | 1    | 0   | 8.92 x 10 <sup>-6</sup>   | 2         | 1     | 1    | 0.41165              | 2       | 0   | <b>PURA</b>    |
| <b>ANKRD17</b> | 2                                 | 0    | 1   | 2.43 x 10 <sup>-4</sup>   | 2         | 0     | 2    | 0.41616              | 3       | 0   | <b>ANKRD17</b> |
| <b>KCNT1</b>   | 1                                 | 2    | 1   | 2.77 x 10 <sup>-9</sup>   | 3         | 3     | 1    | 0.47874              | 4       | 0   | <b>KCNT1</b>   |
| <b>IQSEC2</b>  | 2                                 | 1    | 0   | 1.47 x 10 <sup>-7</sup>   | 3         | 0     | 1    | 0.53261              | 1       | 2   | <b>IQSEC2</b>  |
| <b>GABRA1</b>  | 0                                 | 1    | 1   | 1.01 x 10 <sup>-5</sup>   | 0         | 1     | 2    | 0.54006              | 2       | 0   | <b>GABRA1</b>  |
| <b>SLC35A2</b> | 0                                 | 2    | 0   | 2.56 x 10 <sup>-8</sup>   | 0         | 0     | 2    | 0.56045              | 0       | 2   | <b>SLC35A2</b> |
| <b>RANGAP1</b> | 0                                 | 2    | 0   | 1.54 x 10 <sup>-5</sup>   | 1         | 1     | 2    | 0.57080              | 2       | 0   | <b>RANGAP1</b> |
| <b>KCNQ2</b>   | 6                                 | 2    | 1   | 4.34 x 10 <sup>-24</sup>  | 1         | 1     | 2    | 0.63963              | 9       | 0   | <b>KCNQ2</b>   |
| <b>COL3A1</b>  | 1                                 | 1    | 0   | 1.38 x 10 <sup>-5</sup>   | 0         | 0     | 2    | 0.64324              | 0       | 2   | <b>COL3A1</b>  |
| <b>CASKIN1</b> | 2                                 | 0    | 0   | 9.9 x 10 <sup>-5</sup>    | 2         | 1     | 1    | 0.65342              | 2       | 0   | <b>CASKIN1</b> |
| <b>CACNA1E</b> | 1                                 | 1    | 0   | 3.5 x 10 <sup>-4</sup>    | 2         | 1     | 2    | 0.77109              | 2       | 0   | <b>CACNA1E</b> |
| <b>INO80</b>   | 1                                 | 1    | 0   | 1.14 x 10 <sup>-4</sup>   | 1         | 0     | 1    | 0.82997              | 2       | 0   | <b>INO80</b>   |
| <b>SPTBN1</b>  | 2                                 | 1    | 0   | 3.31 x 10 <sup>-4</sup>   | 2         | 0     | 3    | 0.86884              | 3       | 0   | <b>SPTBN1</b>  |
| <b>CACNB4</b>  | 1                                 | 1    | 0   | 1.56 x 10 <sup>-5</sup>   | 1         | 0     | 1    | 0.98534              | 2       | 0   | <b>CACNB4</b>  |

**Figure 2. Overview of Genetic Etiologies and Associations in the Current Study**

Overview of the genetic etiologies with *de novo* variants in the cohort of 846 individuals included in the current study, sorted by significance of phenotypic similarity (p value phenotype). The number of individuals per sub-cohort (cohort), variant type (variant), and broad phenotypes (phenotypes) is shown. The number reflects the number of individuals with a certain feature, and the size and color of a bubble reflects relative frequency within the specific column. The cohort columns list the number of individuals with *de novo* variants in the EGRP, EPGP/Epi4K, and RES cohorts. The variant column lists the total number of individuals with missense (miss.) and

(legend continued on next page)

(MIM: 182390) ( $n = 8$ ), and *KCNB1* (MIM: 600397) ( $n = 6$ ). When we used *denovolyzer* to estimate the probability of  $n$  *de novo* variants expected to occur in a given cohort of 846 individuals,<sup>28</sup> 19/41 genes with two or more *de novo* variants had a nominal  $p$  value of  $\gg 0.05$ , suggesting that the observed number of *de novo* variants in these genes was higher than expected by chance (Figure 2).

### Genetic Etiologies Implicated in DEE Have Distinct HPO Signatures

To determine the specific HPO terms driving phenotypic similarity for distinct genetic etiologies, we determined the relative contribution of specific HPO terms to each gene-specific similarity, comparing the observed and expected contribution of each HPO term (Figures 3 and 4). In summary, we identified 882 nominally significant gene-HPO associations (Table S3), and the comparison of observed and expected HPO terms resulted in gene-specific patterns (Figures 3, 4, and S7). The significant HPO terms reflect known phenotypic features associated with each genetic etiology, such as “febrile seizures” (HP: 0002373;  $p = 2.0 \times 10^{-10}$ ) and “hemiclonic seizures” (HP: 0006813;  $p = 3.4 \times 10^{-5}$ ) with *SCN1A*, “abnormality of central motor function” (HP: 0011442;  $p = 0.0015$ ) with *STXBPI*, and “developmental regression” (HP: 0002376;  $p = 0.019$ ) with *SLC6A1* (MIM: 137165).

### Phenotypic Similarity Analysis Provides Statistical Evidence in 11 Genetic Etiologies

We next assessed whether genetic etiologies shared by two or more individuals have phenotypic similarities that were higher than expected by chance (Figures 2 and 5). We determined the median phenotypic similarity between individuals with each of the 41 genetic etiologies with two or more *de novo* variants and compared the observed median similarity score to the expected similarity score derived through 100,000 permutations. We identified 11 genetic etiologies with nominally significant phenotypic similarities (Figure 2). The significance for each of these genetic etiologies emerges consistently when adding individuals to the overall cohort and is not dependent on a single sub-cohort in this study (Figure 6). Comparing the statistical evidence for disease causation based on phenotypic evidence (phenotypic similarity) to genetic evidence (frequency of *de novo* variants) shows that the statistical evidence from the frequency of *de novo* variants is typically higher than the evidence derived from phenotypic similarity. However, both lines of evidence are independent. Some genetic etiologies with strong evidence based on the frequency of *de novo* variants are not significant based on phenotypic similarity, such as *IQSEC2* (MIM: 300522)

and *PCDH19* (MIM: 300460). Other genetic etiologies, including *DNM1* (MIM: 602377), *SCN8A* (MIM: 600702), and *AP2M1* (MIM: 601024), have a relatively high phenotypic similarity compared to the significance based on the frequency of *de novo* variants. In addition, *SCN1A* and *STXBPI* demonstrate a high degree of phenotypic similarity and statistical significance based on the frequency of *de novo* variants. The  $\text{sim}_{\text{cm}}$  and  $\text{sim}_{\text{max}}$  algorithms showed some degree of variation between the statistical evidence for distinct genetic etiologies, but results from both algorithms were highly correlated (Figure S1).

The correlation between both algorithms is intriguing because both techniques emphasize slightly different aspects of the assigned phenotypes: the  $\text{sim}_{\text{max}}$  generates a higher degree of similarity when multiple related phenotypes were assigned, e.g., “focal clonic seizures” (HP: 0002266) in addition to “focal aware seizure” (HP: 0002349), whereas the  $\text{sim}_{\text{cm}}$  algorithm would only assign similarity on the basis of the shared ancestral terms. In summary, the  $\text{sim}_{\text{max}}$  algorithm is affected by the density of the assigned HPO terms within a specific sub-branch, whereas the  $\text{sim}_{\text{cm}}$  algorithm is dependent on the granularity of the HPO framework (Supplemental Notes).

In our study, we used a uniform bioinformatic pipeline for variant filtration. Because our pipeline processed heterogeneous exome data with varying quality, we decided to implement conservative thresholds for variant filtration, requiring at least 10 reads of the alternate allele to be present for the *de novo* analysis. We compared our results with the previously reported data from the Epi4K study and found that the threshold used in our study reliably identified all previously reported *de novo* variants.<sup>10</sup> In addition, several individuals from the Epi4K cohort and EuroEPINOMICS-RES cohort had been found to carry *de novo* copy number variants, including known disease genes such as *SCN1A*, *SCN2A*, and *GABRB3* (MIM: 137192).<sup>31</sup> We subsequently repeated the phenotypic similarity analysis including the previously reported copy number variants (Tables S1 and S2). Neither analysis resulted in significant changes to the phenotypic similarities generated for each genetic etiology.

### HPO Term Combinations Result in Unique Phenotype Profiles

In order to assess whether HPO terms can yield unique profiles that are predictive of the presence of a genetic etiology, we assessed the positive predictive value (PPV) of the combination of HPO terms that showed the strongest associations with genetic etiologies. As expected, we found that PPV increases with the addition of more HPO terms (Figure S3) but that the predicted frequency of individuals with the combination of HPO terms decreased. We then

---

protein-truncating variants (PTV). Genotype  $p$  values were calculated with *denovolyzer* and reflect the probability of identifying the observed number of *de novo* variants in a given cohort. Phenotype  $p$  values were derived through a semantic similarity analysis via the  $\text{sim}_{\text{max}}$  method. In the phenotype column, the total number of individuals with neurodevelopmental delay (DD; HP: 0012758), focal-onset seizures (focal; HP: 0007359), and generalized-onset seizures (gen.; HP: 0002197) are listed; these were derived from the harmonized and propagated HPO dataset.

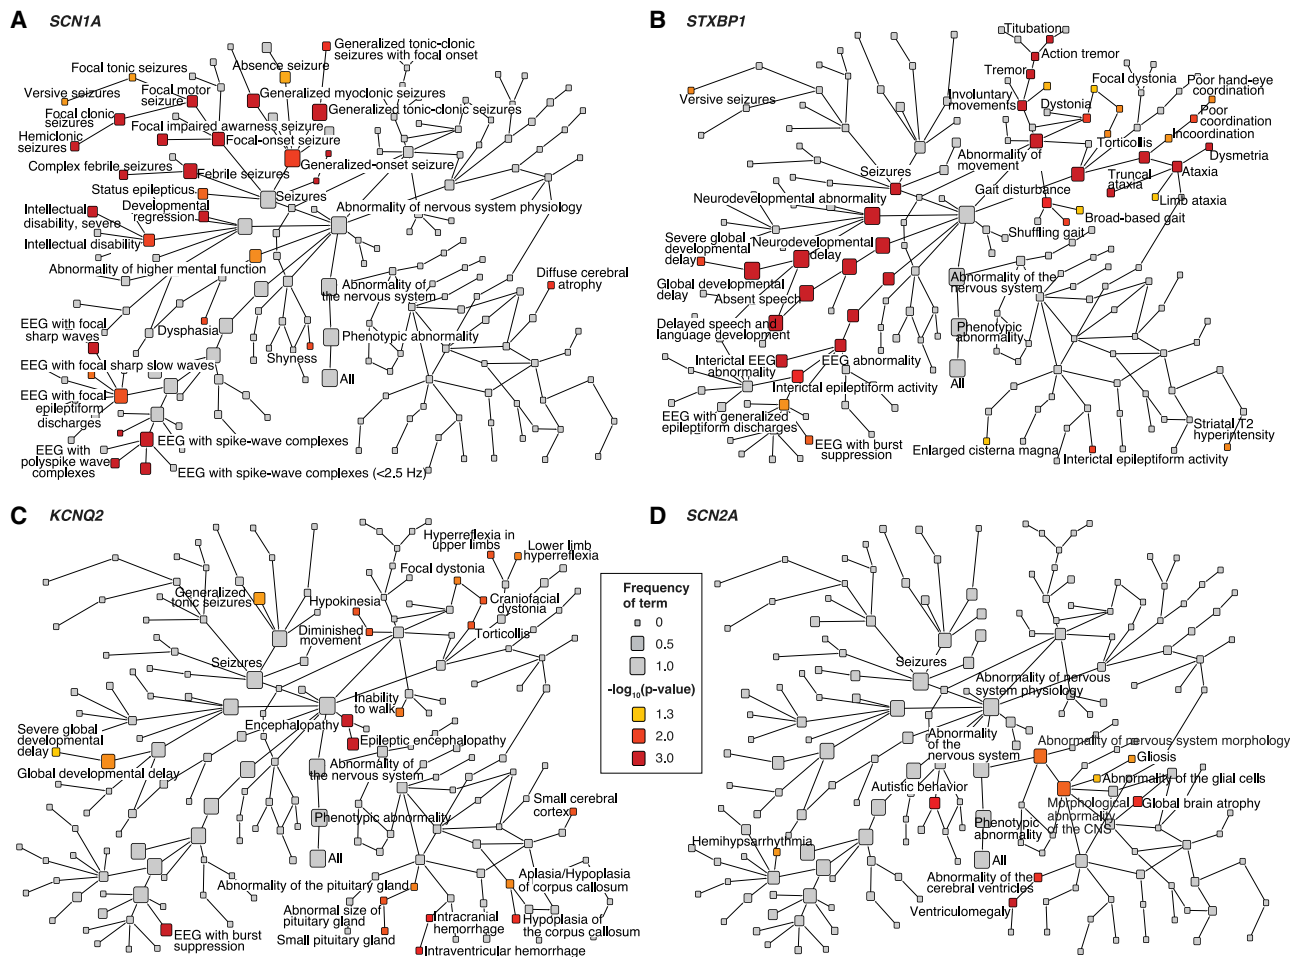

**Figure 3. Phenotype Association with Four Epilepsy Genes Shown as Phenotrees**

(A–D) Each graph (phenotree) displays the branches of the Human Phenotype Ontology (HPO) beginning under the subbranch “abnormality of the nervous system” (HP: 0000707) for *SCN1A*, *STXBP1*, *KCNQ2*, and *SCN2A*. The size of each node indicates the frequency of each HPO term in the group of individuals with *de novo* variants with this gene, and the color indicates the level of statistical significance. The overall structure of the HPO tree is identical for each graph, which enables the visualization of phenotypic associations within the HPO tree. For example, for *SCN1A*, “generalized-onset seizure” (HP: 0002197) is present in 100% of individuals ( $n = 16$ ) with a  $p$  value of 0.005. The more specific term “generalized tonic-clonic seizures” (HP: 0002069) is present in less individuals ( $n = 15$ ,  $f = 0.94$ ), but the association with the gene is stronger ( $p < 0.0001$ ). The even more specific term “generalized tonic-clonic seizures with focal onset” (HP: 0007334) is less common ( $n = 4$ ,  $f = 0.25$ ) but is still associated with *SCN1A* ( $p = 0.01$ ).

assessed the number of HPO terms per genetic etiology required to yield a PPV of 0.8 (Table 1). These term combinations, although only estimated to be present in a subset of individuals, have a probability of at least 80% for a *de novo* variant in the gene to be present. For some genetic etiologies, the combination of HPO terms required for a PPV of 0.8 is expected to be present in a significant number of individuals. For example, for *DNM1*, the combination of four HPO terms, including “brain atrophy” (HP: 0012444), “atrophy/degeneration affecting the central nervous system” (HP: 0007367), “aplasia/hypoplasia involving the central nervous system” (HP: 0002977), and “EEG with spike-wave complexes (<2.5 Hz)” (HP: 0010847), is expected in 41% of individuals with *de novo* variants in the gene, compared to 0.06% of individuals in the remainder of the cohort, resulting in a PPV of 0.8 for this combination of terms.

### Phenotypic Similarity Increases with the Inclusion of Unaffected Population Controls

In our current cohort of 846 individuals, the genetic evidence based on the probability of *de novo* variants in identified genetic etiologies was stronger than the statistical evidence derived from phenotypic similarity associated with that etiology. We reason that both parameters are driven by different factors in the overall cohort. The statistical significance of the frequency of *de novo* variants is greatest when the study cohort consists of a large number of affected individuals with a single underlying genetic etiology. Accordingly, inclusion of additional individuals with heterogeneous or unselected phenotypes will reduce the frequency of *de novo* variants for a specific genetic etiology in the larger cohort. In contrast, the phenotypic similarity associated with a given etiology is artificially diminished in cohorts of individuals with homogeneous

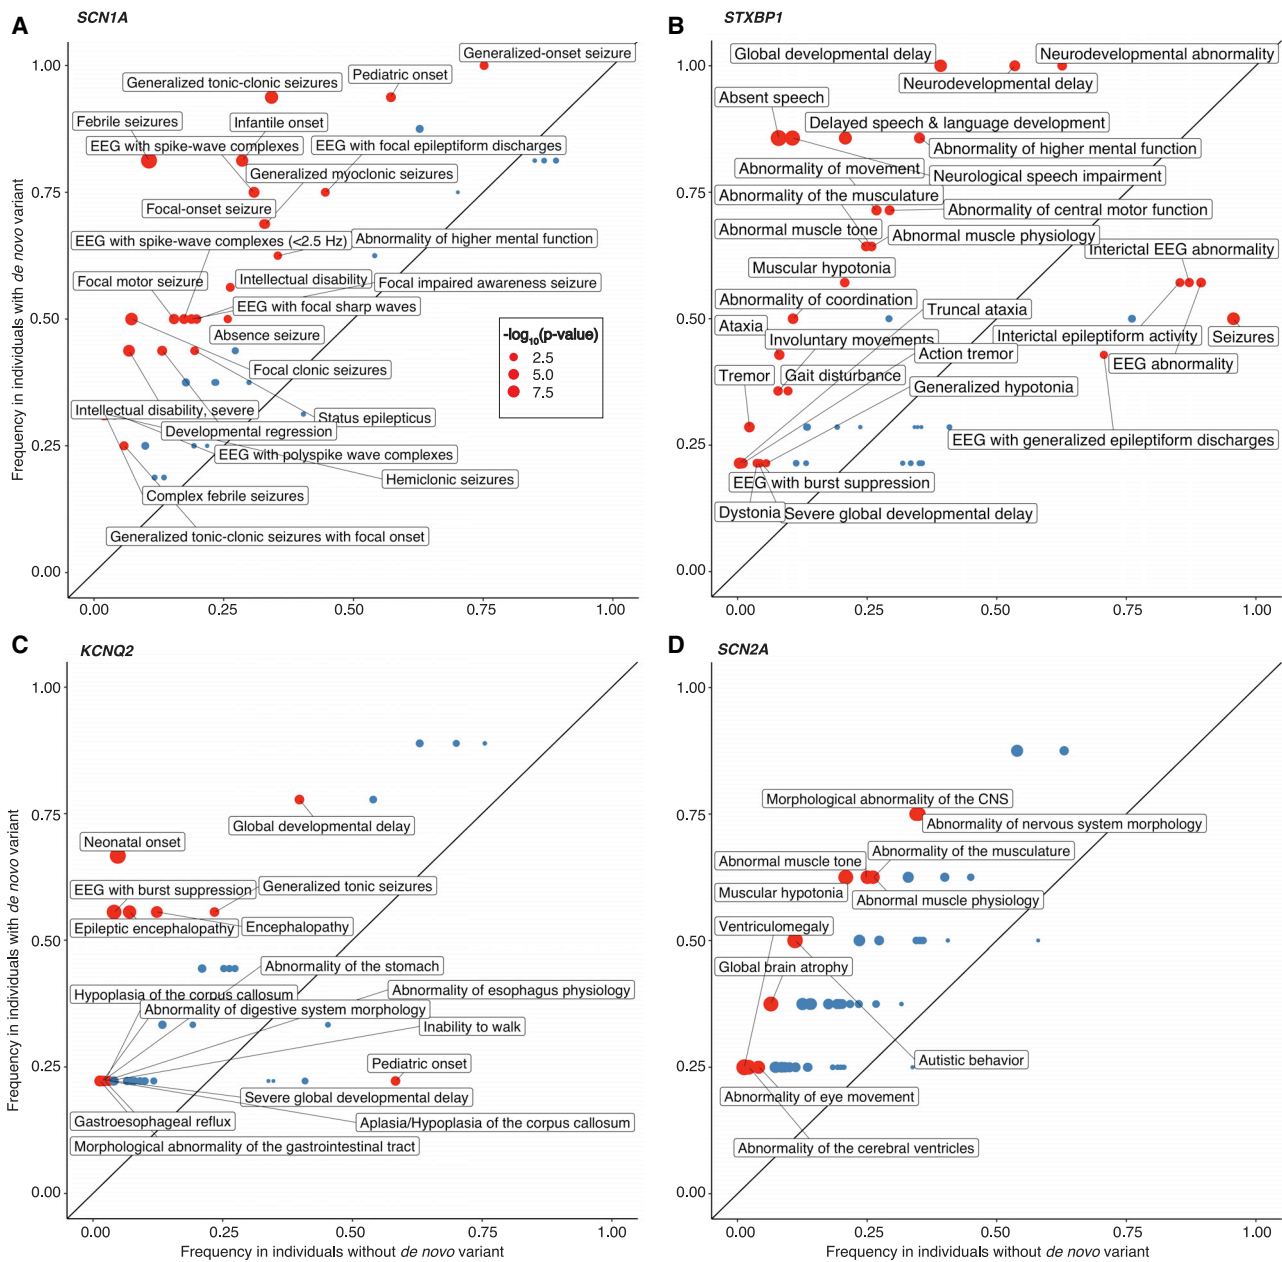

**Figure 4. Phenotype Association with Four Epilepsy Genes Shown as Phenograms**

(A–D) Each graph (phenogram) displays the frequencies of HPO terms in *SCN1A*, *STXB1*, *KCNQ2*, and *SCN2A* compared to the frequency in the overall cohort. The information contained reflects the associations shown in Figure 3 but allows for an alternative view of the gene-phenotype associations that includes the comparison to the wider cohort. Red dots indicate significant associations ( $p < 0.05$ ) between HPO terms and specific genes. The size of the dot denotes the degree of significance displayed as  $-\log_{10}(p \text{ value})$ . Because there are 1,616 unique HPO terms, rare and redundant terms were removed, e.g., “morphological abnormality of the central nervous system” (HP: 0002011) was removed when the more specific term “abnormality of brain morphology” (HP: 0012443) was present. For example, for *SCN1A*, “generalized tonic-clonic seizures” (HP: 0002069) are present in 94% of individuals with *de novo* variants compared to 34% in the remaining cohort. Accordingly, “generalized tonic-clonic seizures” (HP: 0002069) is located in the upper left corner of the phenogram and this association is significant ( $p = 1.5 \times 10^{-6}$ ), as indicated by the color and size of the dot. In comparison, as can be seen from the relative positioning on the phenogram, “febrile seizures” (HP: 0002373) are less common in individuals with *SCN1A* than “generalized tonic-clonic seizures” (HP: 0002069). However, as indicated by the size of the dot, the association with *SCN1A* is stronger ( $p = 2 \times 10^{-10}$ ) because the frequency in the overall cohort is very low.

phenotypes because the information content of terms depends upon its frequency in the cohort and, consequently, variation in phenotypic features is necessary for phenotypic similarity analysis to distinguish individuals who share a particular genetic etiology from those who do

not. This is exemplified by the relatively low IC of “seizures” (HP: 0001250, IC = 0.075). In contrast to the diluting effect on the frequency of *de novo* variants, inclusion of individuals with heterogeneous phenotypes is likely to increase the phenotypic similarity of individuals



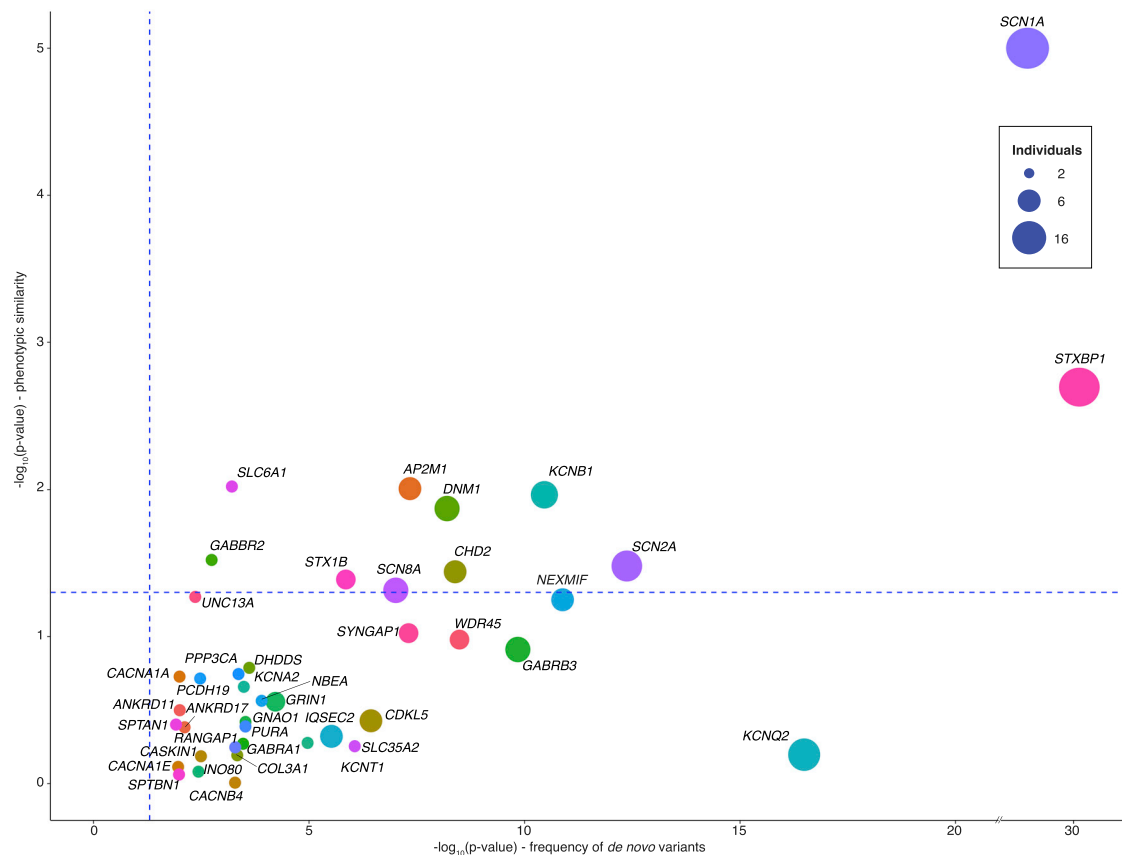

**Figure 5. Comparison of Statistical Significance for the Frequency of Observed *De Novo* Variants and Phenotypic Similarity in 41 Genes**

The graph compares the statistical significance for 41 genetic etiologies for genetic and phenotypic evidence. The point size indicates the number of individuals with *de novo* variants in each gene, and dashed blue lines represent  $-\log_{10}(0.05)$ . Genetic evidence (x axis) reflects the significance, which was assessed with *denovolyzer*, for observed *de novo* variants. Phenotypic evidence reflects phenotypic similarity generated with *sim<sub>max</sub>* followed by permutation analysis (y axis). Contrasting genetic and phenotypic evidence allows for the comparison of both approaches and identification where one method deviates from the expected correlation. For example, *de novo* variants in *KCNQ2* are present in nine individuals, but the phenotypic evidence is less than would be expected for genes with the same number of *de novo* variants. This discrepancy might be due to incomplete phenotyping or the inability of the HPO to capture the defining features of the disease correctly.

with the same underlying genetic etiology because gene-related phenotypic features would become less frequent and therefore more informative. We tested this hypothesis by expanding our cohort to include 1,548 population controls that were sequenced for *de novo* variants and not assigned HPO terms (Figure 6).<sup>32</sup>

We observed the expected reduction in statistical significance for *de novo* variants, whereas the statistical evidence for phenotypic similarity increased. The trend continued when we subsequently added simulated population controls without *de novo* variants or phenotypic features. These results indicate that methods assessing phenotypic similarity may have an advantage in cohorts with heterogeneous phenotypes where genetic evidence based on the frequency of *de novo* variants may be insufficient to identify gene-disease associations. In these cohorts, the statistical evidence derived from phenotypic similarity may exceed the genetic evidence, particularly if future studies can exploit deeper phenotype data.

## Discussion

In our study we assessed whether harmonization of sparse and heterogeneous phenotypic data via the HPO is capable of capturing associated clinical features and phenotypic similarities. Our aim was to model the cognitive process of recognizing gene-disease relationships through computational algorithms, providing a scalable method for phenotype analysis in large datasets. We reasoned that clinical features associated with distinct genetic etiologies may be prominent enough to stand out from the phenotypes in the larger cohort. We identified gene-specific phenotypic signatures and found that, for 11 genetic etiologies with *de novo* variants, the associated phenotypic similarities were greater than expected by chance.

Because of a lack of consistent frameworks and techniques, correlating clinical and genetic findings at scale remains a major hurdle in biomedical research<sup>33</sup> and, despite attempts at standardization, phenotypic terminology

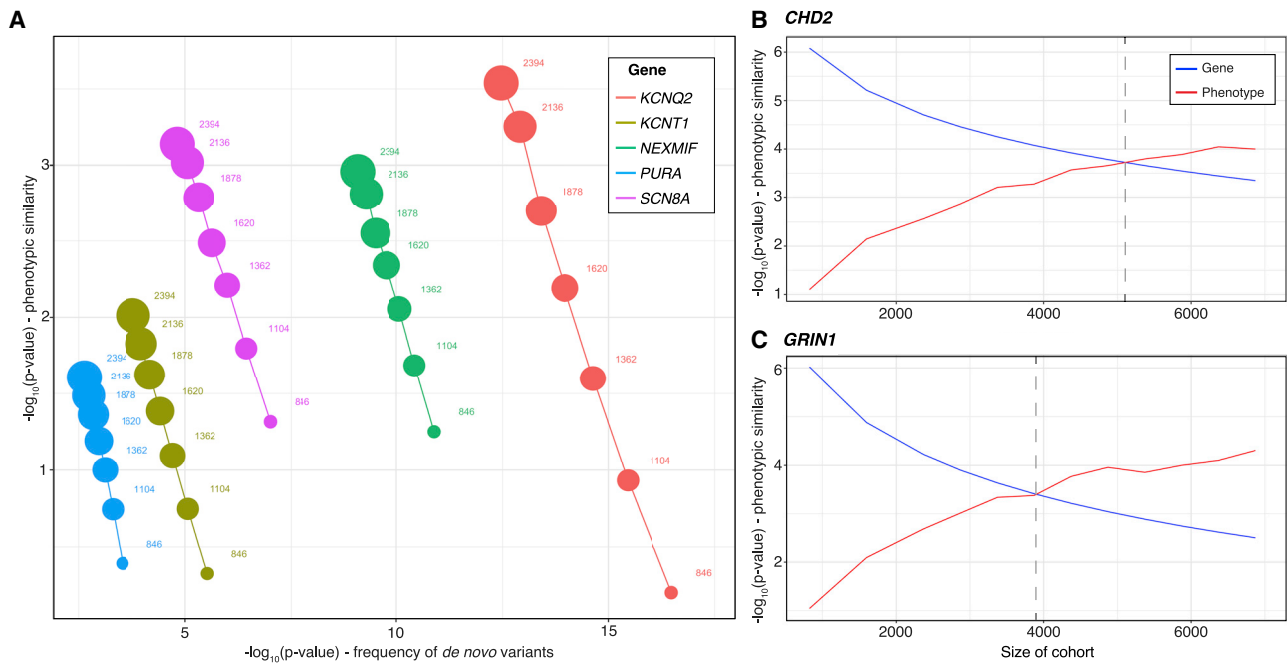

**Figure 6. Addition of Controls Results in Increased Phenotype-Based Significance and Reduced Genotype-Based Significance**  
 (A) On the basis of the initial cohort of 846 individuals with DEE, subsequent addition of 1,548 population controls sequenced for *de novo* variants and without HPO terms results in a steady increase in the statistical significance of gene-based phenotypic similarity. Inversely, statistical significance based on the frequency of observed *de novo* variants steadily decreases with the addition of controls. (B and C) With additional simulated controls, significance based on phenotypic similarity eventually exceeds significance based on frequency of *de novo* variants for *CHD2* (B) and *GRIN1* (C). The gray line indicates the critical cohort size when phenotypic significance becomes more significant than genotype-based significance.

remains heterogenous. Concepts to harmonize clinical phenotypic descriptions and to provide defined relationships between individual terms attempt to address this issue, and the HPO is one of the most frequently used frameworks. We demonstrate that the structure of the HPO can be used to harmonize phenotypic data across cohorts, including all major studies in the field of epilepsy research where trio exome data has been generated and where phenotypic features have been systematically captured. We further demonstrate that this conceptual framework can be used to operationalize previously vague concepts, such as phenotypic depth. For example, we find that the EPGP/Epi4K cohort only has a median of nine assigned phenotypic terms compared to the manually phenotyped EGRP cohort, which has a median of 13.5 phenotypic terms, translating into a median difference in IC of 131.9 (Figure 1, inset). Such concepts may help advance the understanding on how quality and quantity of phenotypic data associated with large genomic datasets can be measured and evaluated.

We find that the gene-phenotype associations identified in the harmonized clinical data correspond to the known phenotypic features in many of the genetic etiologies that are included in our study. For example, the most significant HPO terms associated with *SCN1A* accurately reflect the clinical spectrum of Dravet syndrome<sup>34–36</sup> even though none of the individuals included in the study were primarily diagnosed with this condition given that

the included data resources (EPGP/Epi4K and EuroEPI-NOMICS) were gene-discovery studies that excluded individuals with known genetic diagnoses.<sup>24</sup> Likewise, the phenotypic spectrum linked to *STXBPI* with “absent speech” (HP: 0001344;  $p = 1.31 \times 10^{-11}$ ) and “truncal ataxia” (HP: 0002078;  $p = 7.03 \times 10^{-5}$ ) reflects known phenotypic associations,<sup>37</sup> as does the association of *SCN2A* with “autistic behavior” (HP: 0000729;  $p = 0.0079$ ),<sup>38–41</sup> *DNM1* with “obtundation status” (HP: 0011151;  $p = 0.00058$ ),<sup>11,42</sup> and *KCNQ2* with “neonatal onset” (HP: 0003623;  $p = 1.39 \times 10^{-6}$ ).<sup>43–45</sup>

We next evaluated whether the phenotypic terms linked to specific genetic etiologies were sufficiently strong for a gene-specific phenotypic signature to emerge. We applied two algorithms based on the MICA concept, assessing pairwise phenotypic similarities between individuals through the combination of the most specific terms shared by both individuals.<sup>29</sup> Although both our algorithms are based on slightly different strategies, we find convergence for both concepts—both our  $sim_{max}$  and  $sim_{cm}$  measures identify at least ten distinct genes associated with phenotype features more similar than expected by chance. Given that all individuals included in our study had epilepsy or neurodevelopmental disorders, we conclude that phenotypic features associated with genetic etiologies, including *SCN1A*, *STXBPI*, *SLC6A1*, *AP2M1*, and *KCNB1*, are not only similar per se, but they are also sufficiently similar to be identified within a cohort of individuals with related phenotypes.

**Table 1. HPO Terms Required to Reach a PPV of at Least 80% for Genetic Etiologies in the Cohort**

| Gene                 | PPV  | Number of Terms | Cumulative Frequency | Individuals with Etiology | HPO ID      | HPO Term                                | Frequency |
|----------------------|------|-----------------|----------------------|---------------------------|-------------|-----------------------------------------|-----------|
| <b><i>DNM1</i></b>   | 0.80 | 4               | 0.41                 | 5                         | HP: 0012444 | brain atrophy                           | 0.80      |
|                      |      |                 |                      |                           | HP: 0007367 | atrophy/degeneration affecting the CNS  | 0.80      |
|                      |      |                 |                      |                           | HP: 0002977 | aplasia/hypoplasia involving the CNS    | 0.80      |
|                      |      |                 |                      |                           | HP: 0010847 | EEG with spike-wave complexes (<2.5 Hz) | 0.80      |
| <b><i>KCNB1</i></b>  | 0.81 | 5               | 0.070                | 6                         | HP: 0011442 | abnormality of central motor function   | 0.83      |
|                      |      |                 |                      |                           | HP: 0011443 | abnormality of coordination             | 0.50      |
|                      |      |                 |                      |                           | HP: 0000729 | autistic behavior                       | 0.50      |
|                      |      |                 |                      |                           | HP: 0000708 | behavioral abnormality                  | 0.67      |
|                      |      |                 |                      |                           | HP: 0000234 | abnormality of the head                 | 0.50      |
| <b><i>SCN1A</i></b>  | 0.90 | 5               | 0.23                 | 16                        | HP: 0002373 | febrile seizures                        | 0.81      |
|                      |      |                 |                      |                           | HP: 0002069 | generalized tonic-clonic seizures       | 0.94      |
|                      |      |                 |                      |                           | HP: 0003593 | infantile onset                         | 0.81      |
|                      |      |                 |                      |                           | HP: 0010850 | EEG with spike-wave complexes           | 0.75      |
|                      |      |                 |                      |                           | HP: 0011153 | focal motor seizure                     | 0.50      |
| <b><i>STXBP1</i></b> | 0.87 | 5               | 0.63                 | 14                        | HP: 0002167 | neurological speech impairment          | 0.86      |
|                      |      |                 |                      |                           | HP: 0000750 | delayed speech and language development | 0.86      |
|                      |      |                 |                      |                           | HP: 0001263 | global developmental delay              | 1.00      |
|                      |      |                 |                      |                           | HP: 0011446 | abnormality of higher mental function   | 0.86      |
|                      |      |                 |                      |                           | HP: 0012758 | neurodevelopmental delay                | 1.00      |
| <b><i>AP2M1</i></b>  | 0.86 | 6               | 0.18                 | 4                         | HP: 0001252 | muscular hypotonia                      | 0.75      |
|                      |      |                 |                      |                           | HP: 0000750 | delayed speech and language development | 0.75      |
|                      |      |                 |                      |                           | HP: 0011463 | childhood onset                         | 0.75      |
|                      |      |                 |                      |                           | HP: 0010819 | atonic seizures                         | 0.75      |
|                      |      |                 |                      |                           | HP: 0000708 | behavioral abnormality                  | 0.75      |
|                      |      |                 |                      |                           | HP: 0003808 | abnormal muscle tone                    | 0.75      |
| <b><i>CHD2</i></b>   | 0.84 | 6               | 0.12                 | 4                         | HP: 0002133 | status epilepticus                      | 0.75      |
|                      |      |                 |                      |                           | HP: 0011463 | childhood onset                         | 0.75      |
|                      |      |                 |                      |                           | HP: 0000708 | behavioral abnormality                  | 0.75      |
|                      |      |                 |                      |                           | HP: 0001249 | intellectual disability                 | 0.75      |
|                      |      |                 |                      |                           | HP: 0002373 | febrile seizures                        | 0.50      |
|                      |      |                 |                      |                           | HP: 0002123 | generalized myoclonic seizures          | 0.75      |

For each genetic etiology in the cohort, the number of terms needed to reach a positive predictive value (PPV) of at least 80% was calculated. Displayed are all etiologies that required 6 terms or less to reach this threshold. HPO terms and their frequency within each genetic etiology are displayed.

Given that we used the example of Rett Syndrome as an introduction to the conceptual framework of phenotypic similarity, we performed a simulation to test whether the phenotypic similarity between six individuals with Rett Syndrome would appear significant if they were added to our existing dataset (Figure S3 and Supplemental Notes). In our simulation, although these four individuals with hypothetical *MECP2* *de novo* variants would not be significantly similar if only a single term is added (“stereotypical

hand wringing” [HP: 001217]), these individuals will have significant phenotypic similarity when two phenotypic terms are assigned (“stereotypical hand wringing” [HP: 0012171] and “developmental regression” [HP: 0002376],  $p = 0.05$ ) or when four phenotypic terms are assigned (“stereotypical hand wringing” [HP: 0012171], “developmental regression” [HP: 0002376], “absent speech” [HP:0001344], and “apraxia” [HP:0002186],  $p = 0.002$ ). This hypothetical example highlights that our approach

can recapitulate the clinical recognition of specific phenotypes, such as Rett Syndrome.

To demonstrate the role of phenotypic homogeneity on the results of our study, we assessed how the inclusion of actual and simulated control individuals would affect the results of our study. We find that the phenotypic distinctiveness of all genetic etiologies increases with the inclusion of controls, whereas the probability of *de novo* variants decreases. We further demonstrate that, with sufficient numbers of controls, the significance derived from our phenotypic similarity analysis will surpass the significance derived on the basis of the probability of *de novo* variants, even when using sparse phenotypic features. This emphasizes the utility of methods based on phenotypic similarity when assessing the causative role of rare genetic changes in large cohorts. Such methods may be useful for identifying individuals with extremely rare monogenic causes when analyzing population-based studies or entire healthcare systems.

Our phenotypic similarity analysis also showed several unexpected findings. Several genetic etiologies with relatively homogeneous phenotypes did not demonstrate the degree of phenotypic similarity that would have been expected. Most prominently, individuals carrying *de novo* variants in *KCNQ2* did not show more phenotypic similarity than expected by chance. This finding is surprising given that clinical features in individuals with *KCNQ2*-related disorders are strikingly similar given the almost universal seizure onset in the neonatal period. A total of 45 HPO terms, including “neonatal onset” (HP: 0003623), “EEG with burst suppression” (HP: 0010851), “epileptic encephalopathy” (HP: 0200134), “encephalopathy” (HP: 0001298), and “gastroesophageal reflux” (HP: 0002020), were nominally associated with *KCNQ2*. We reviewed the phenotypic terms contributing to the nine individuals with *KCNQ2*-related disorders and found that the ten most strongly associated phenotypic terms were absent in three individuals (EIEE49, EPGP011188, and EPGP015469). In two of these individuals, we observed a very low depth of phenotyping. Individuals EIEE49 and EPGP015469 only had four and six phenotypic terms assigned, respectively, whereas the seven other individuals with *de novo* variants in *KCNQ2* had a median of 11 assigned HPO terms. This observation suggests that the lack of similarity in individuals with *KCNQ2* may be due to incomplete phenotyping rather than true phenotypic variation. As expected, when we added missing phenotypic terms to the three individuals, the overall phenotypic similarity became significant. The phenotypic similarity for all nine individuals reached  $p = 0.008$  when adding the top three terms and  $p = 5.0 \times 10^{-5}$  when adding the top ten terms associated with *KCNQ2* missing in individuals EIEE49, EPGP011188, and EPGP015469.

The ability to pinpoint the lack of phenotypic similarity to individual factors, such as incomplete phenotyping, may highlight a strength of our approach—by harmonizing phenotypic information into a common format, it becomes possible to dissect phenotypes in individual genetic etiolo-

gies and identify sets of clinical features that drive the observed phenotypic similarity. However, the *KCNQ2* example also highlights the need for methods that ensure that phenotypes are encoded uniformly and in an exhaustive manner. Although the overall framework of the HPO allows for both detailed and shallow datasets to be merged and analyzed jointly, it is a conceptual weakness of the HPO that phenotype quality and certainty cannot be encoded. Because it will remain conceptually challenging to distinguish incomplete phenotyping from truly absent phenotypes, quality measures and standard operation procedures for phenotypes will be required to ensure that the already heterogeneous phenotype data is not confounded as a result of low-quality phenotyping data.

Our study had several limitations. We observed a range of phenotypic terms assigned to the individuals and a significant difference among the different cohorts included: the EGRP cohort was significantly more deeply phenotyped compared to the EPGP/Epi4K or EuroEPINOMICS cohorts. Given the difference in phenotyping depth within and between cohorts, key aspects of the clinical presentation in some individuals may be incomplete, thus limiting the capacity of the similarity algorithms to identify individuals with shared features. Furthermore, the phenotypic features captured for an individual may only capture those manifesting by the age at last data collection. For example, individuals with loss-of-function variants in *SCN2A* typically present with developmental delay and autism, and seizures are frequently observed only after the age of two. Consequently, for younger individuals, seizures may not be recorded. In the EGRP sub-cohort in which age of recruitment was systematically recorded in 151/192 individuals, 30/151 individuals were recruited and phenotyped before the age of two. Accordingly, phenotypic similarities due to clinical features with later onset would not be able to be detected in this cohort. However, this limitation in recruitment strategy and data collection applies to traditional phenotypic analyses. We expect that more thorough longitudinal phenotypic details will be made available in the future through improved methods of extracting clinical information from electronic medical records, including advanced natural language processing and corrections for age-dependent phenotypic features.

A further limitation of our study was our reliance on retrospective data and that there may have been bias on how clinicians assigned HPO terms on the basis of their knowledge or assumption of the underlying genetic cause. Although we cannot exclude such an effect in the EGRP cohort, both the EPGP and RES cohorts were phenotyped prior to sequencing and HPO term assignment was not performed knowing the individuals' genotypes. Despite this blinding, we cannot exclude that clinicians may have been biased toward an assumed underlying genetic diagnosis.

In summary, we demonstrate that an HPO-based framework is capable of bridging and harmonizing phenotypic data across various clinical datasets that were captured

alongside large sequencing projects in the epilepsies. Although clinical data is heterogeneous and sparse, the mapping of features to a common ontology allows for the detection of frequently associated clinical features. The subsequent use of phenotypic similarity algorithms enables the detection of significant clinical similarities between individuals with shared genetic etiologies. These methods provide independent statistical evidence for disease causation and can be viewed as an extension of the clinical-genetic approach of defining disease entities through phenotypic resemblance. Given the increasing amounts of deep phenotypic data available for systematic analysis, methods that use computational phenotypes have the potential to identify novel genetic etiologies, particularly in situations when individuals have distinct phenotypic features and when the causative genetic etiology is rare.

## Data and Code Availability

The code generated during this study are available through GitHub ([https://github.com/galerp/helbig\\_lab\\_hpo\\_sim](https://github.com/galerp/helbig_lab_hpo_sim)). The data from EuroEPINOMICS-RES (EGA), accession numbers EGAS00001000190, EGAS00001000386, and EGAS00001000048, and Epi4k (dbgap), accession number phs000653.v2.p1, are publicly available. A subset of the datasets supporting the current study have not been deposited in a public repository because of local consent and IRB restrictions but are available from the corresponding author on request.

## Supplemental Data

Supplemental Data can be found online at <https://doi.org/10.1016/j.ajhg.2020.08.003>.

## Consortia

The members of the Non-Classical Epileptic Encephalopathy (NCEE) Study Group are Ralf Berkenfeld, Ingo Borggräfe, Andrea Dieckmann, Milda Endziniene, Andreas Faber, Andre Franke, Helge Gallwitz, Markus Gschwind, Christian M. Korff, Gerd Kurlemann, Sebastien Lebon, Johannes R. Lemke, Frank Maier, Thomas Mayer, Rikke Möller, Susanne Schubert-Bast, Niklas Schwarz, Simone Seifert, Bernhard J. Steinhoff, Inga Talvik, Shan Tang, and Holger Thiele.

The EPGP Investigators are Bassel Abou-Khalil, Brian Alldredge, Dina Amrom, Eva Andermann, Jocelyn Bautista, Sam Berkovic, Judith Bluvstein, Alex Boro, Gregory Cascino, Damian Consalvo, Sabrina Cristofaro, Patricia Crumrine, Orrin Devinsky, Dennis Dlugos, Michael Epstein, Robyn Fahlstrom, Miguel Fiol, Nathan Fountain, Kristen Fox, Jacqueline French, Catharine Freyer, Daniel Friedman, Eric Geller, Tracy Glauser, Simon Glynn, Kevin Haas, Sheryl Haut, Jean Hayward, Sucheta Joshi, Andres Kanner, Heidi Kirsch, Robert Knowlton, Eric Kossoff, Rachel Kuperman, Ruben Kuzniecky, Daniel Lowenstein, Shannon McGuire, Paul Motika, Gerard Nesbitt, Edward Novotny, Ruth Ottman, Juliann Paolicchi, Jack Parent, Kristen Park, Annapurna Poduri, Neil Risch, Lynette

Sadleir, Ingrid Scheffer, Renee Shellhaas, Elliott Sherr, Jerry J. Shih, Shlomo Shinnar, Rani Singh, Joseph Sirven, Michael Smith, Michael R. Sperling, Joe Sullivan, Liu Lin Thio, Anu Venkat, Eileen Vining, Gretchen Von Allmen, Judith Weisenberg, Peter Widdess-Walsh, and Melodie Winawer.

The members of the EuroEPINOMICS-RES consortium are Rudi Balling, Nina Barisic, Stéphanie Baulac, Hande Caglayan, Dana Craiu, Peter De Jonghe, Christel Depienne, Renzo Guerrini, Helle Hjalgrim, Dorota Hoffman-Zacharska, Johanna Jähn, Karl Martin Klein, Bobby P. C. Koeleman, Vladimir Komarek, Eric Leguern, Anna-Elina Lehesjoki, Johannes R. Lemke, Holger Lerche, Tarja Linnankivi, Carla Marini, Patrick May, Rikke S. Møller, Deb K. Pal, Aarno Palotie, Felix Rosenow, Kaja Selmer, Jose M. Serratosa, Sanjay Sisodiya, Ulrich Stephani, Katalin Štěrbová, Pasquale Striano, Arvid Suls, Tiina Talvik, Sarah Weckhuysen, and Federico Zara.

The members of the Genomics Research and Innovation Network are Paul Avillach, Anna Bartels, Alan H. Beggs, Sawona Biswas, Florence T. Bourgeois, Jeremy Corsmo, Andrew Dauber, Batsal Devkota, Gary R. Fleisher, Tracy Glauser, Adda Grimberg, Tiffney Hartman, Colin Hawkes, Allison P. Heath, Ingo Helbig, Joel N. Hirschhorn, Judson Kilbourn, Susan Kornetsky, Ian D. Krantz, Joseph A. Majzoub, Kenneth D. Mandl, Eric Marsh, Keith Marsolo, Lisa J. Martin, Jeremy Nix, Amy Schwarzhoff, Jason Stedman, Arnold Strauss, Kristen L. Sund, Deanne M. Taylor, Peter S. White, and Sek Won Kong.

## Acknowledgments

We thank the participants and their family members for taking part in the study. We also thank Margaret O'Brien, Mahgenn Cosico, Priya Vaidiswaran, and Eryn Fitch for support in enrolling research participants. I.H. was supported by The Hartwell Foundation through an Individual Biomedical Research Award. This work was also supported by NINDS (K02 NS112600), including the Channelopathy-associated Research Center (U54 NS108874), NICHD through the Intellectual and Developmental Disabilities Research Center (IDDR) at Children's Hospital of Philadelphia and the University of Pennsylvania (U54 HD086984), and NCATS (UL1 TR001878). The content is the responsibility of the authors and does not necessarily represent the official views of the NIH. This project was also supported in part by the Institute for Translational Medicine and Therapeutics' (ITMAT) Transdisciplinary Program in Translational Medicine and Therapeutics at the Perelman School of Medicine of the University of Pennsylvania and by the Children's Hospital of Philadelphia through the Epilepsy NeuroGenetics Initiative (ENGIN). The study also received support through the German Research Foundation (DFG; HE5415/3-1, HE5415/5-1, and HE5415/6-1 to I.H. and WE4896/3-1 to Y.W.) and the DFG/FNR INTER Research Unit FOR2715 (WE4896/4-1 and HE5415/7-1 to I.H. and Y.W. and INTER/DFG/17/11583046 to R.K.). I.H. also received support through the International League Against Epilepsy (ILAE) and the Genomics Research and Innovation Network. C.A.E. was supported an NIH Ruth L. Kirschstein National Research Service Award (NRSA) Institutional Research Training Grant (T32 NS091008). D.L.S. was supported by the Wellcome Trust 4ward North Clinical PhD Academy.

## Declaration of Interests

The authors declare no competing interests.

Received: March 16, 2020  
Accepted: July 31, 2020  
Published: August 26, 2020

## Web Resources

Human Phenotype Ontology, <https://hpo.jax.org/app/>  
OBO Citation and Attribution Policy, <http://www.obofoundry.org/docs/Citation.html>  
Online Mendelian Inheritance in Man, <https://www.omim.org/>

## References

- Hagberg, B., Aicardi, J., Dias, K., and Ramos, O. (1983). A progressive syndrome of autism, dementia, ataxia, and loss of purposeful hand use in girls: Rett's syndrome: report of 35 cases. *Ann. Neurol.* *14*, 471–479.
- Rett, A. (1966). Über ein eigenartiges hirnatrophisches Syndrom bei Hyperammonämie im Kindersalter. *Wien. Med. Wochenschr.* *116*, 723–726.
- Amir, R.E., Van den Veyver, I.B., Wan, M., Tran, C.Q., Francke, U., and Zoghbi, H.Y. (1999). Rett syndrome is caused by mutations in X-linked MECP2, encoding methyl-CpG-binding protein 2. *Nat. Genet.* *23*, 185–188.
- Kozinetz, C.A., Skender, M.L., MacNaughton, N., Almes, M.J., Schultz, R.J., Percy, A.K., and Glaze, D.G. (1993). Epidemiology of Rett syndrome: a population-based registry. *Pediatrics* *91*, 445–450.
- Laurvick, C.L., de Klerk, N., Bower, C., Christodoulou, J., Ravine, D., Ellaway, C., Williamson, S., and Leonard, H. (2006). Rett syndrome in Australia: a review of the epidemiology. *J. Pediatr.* *148*, 347–352.
- Claes, L., Del-Favero, J., Ceulemans, B., Lagae, L., Van Broeckhoven, C., and De Jonghe, P. (2001). De novo mutations in the sodium-channel gene SCN1A cause severe myoclonic epilepsy of infancy. *Am. J. Hum. Genet.* *68*, 1327–1332.
- Barcia, G., Fleming, M.R., Deligniere, A., Gazula, V.R., Brown, M.R., Langouet, M., Chen, H., Kronengold, J., Abhyankar, A., Cilio, R., et al. (2012). De novo gain-of-function KCNT1 channel mutations cause malignant migrating partial seizures of infancy. *Nat. Genet.* *44*, 1255–1259.
- Helbig, I., and Lindhout, D. (2017). Advancing the phenome alongside the genome in epilepsy studies. *Neurology* *89*, 14–15.
- Helbig, I., Riggs, E.R., Barry, C.A., Klein, K.M., Dymont, D., Thaxton, C., Sadikovic, B., Sands, T.T., Wagnon, J.L., Liaquat, K., et al. (2018). The ClinGen Epilepsy Gene Curation Expert Panel-Bridging the divide between clinical domain knowledge and formal gene curation criteria. *Hum. Mutat.* *39*, 1476–1484.
- Epi4K Consortium; and Epilepsy Phenome/Genome Project, Allen, A.S., Berkovic, S.F., Cossette, P., Delanty, N., Dlugos, D., Eichler, E.E., Epstein, M.P., Glauser, T., et al. (2013). De novo mutations in epileptic encephalopathies. *Nature* *501*, 217–221.
- EuroEPINOMICS-RES Consortium; Epilepsy Phenome/Genome Project; and Epi4K Consortium (2017). De Novo Mutations in Synaptic Transmission Genes Including DNMT1 Cause Epileptic Encephalopathies. *Am. J. Hum. Genet.* *100*, 360–370.
- Epi25 Collaborative (2019). Ultra-Rare Genetic Variation in the Epilepsies: A Whole-Exome Sequencing Study of 17,606 Individuals. *Am. J. Hum. Genet.* *105*, 267–282.
- Lindy, A.S., Stosser, M.B., Butler, E., Downtain-Pickersgill, C., Shanmugham, A., Retterer, K., Brandt, T., Richard, G., and McKnight, D.A. (2018). Diagnostic outcomes for genetic testing of 70 genes in 8565 patients with epilepsy and neurodevelopmental disorders. *Epilepsia* *59*, 1062–1071.
- Truty, R., Patil, N., Sankar, R., Sullivan, J., Millichap, J., Carvill, G., Entezam, A., Esplin, E.D., Fuller, A., Hogue, M., et al. (2019). Possible precision medicine implications from genetic testing using combined detection of sequence and intragenic copy number variants in a large cohort with childhood epilepsy. *Epilepsia Open* *4*, 397–408.
- Heyne, H.O., Artomov, M., Battke, F., Bianchini, C., Smith, D.R., Liebmann, N., Tadigotla, V., Stanley, C.M., Lal, D., Rehm, H., et al. (2019). Targeted gene sequencing in 6994 individuals with neurodevelopmental disorder with epilepsy. *Genet. Med.* *21*, 2496–2503.
- Heyne, H.O., Singh, T., Stamberger, H., Abou Jamra, R., Cagluyan, H., Craiu, D., De Jonghe, P., Guerrini, R., Helbig, K.L., Koeleman, B.P.C., et al.; EuroEPINOMICS RES Consortium (2018). De novo variants in neurodevelopmental disorders with epilepsy. *Nat. Genet.* *50*, 1048–1053.
- Helbig, I., and Ellis, C.A. (2020). Personalized medicine in genetic epilepsies - possibilities, challenges, and new frontiers. *Neuropharmacology* *172*, 107970.
- Helbig, I., Lopez-Hernandez, T., Shor, O., Galer, P., Ganesan, S., Pendziwiat, M., Rademacher, A., Ellis, C.A., Hümpfer, N., Schwarz, N., et al.; EuroEPINOMICS-RES Consortium; and GRIN Consortium (2019). A Recurrent Missense Variant in AP2M1 Impairs Clathrin-Mediated Endocytosis and Causes Developmental and Epileptic Encephalopathy. *Am. J. Hum. Genet.* *104*, 1060–1072.
- Bastarache, L., Hughey, J.J., Hebring, S., Marlo, J., Zhao, W., Ho, W.T., Van Driest, S.L., McGregor, T.L., Mosley, J.D., Wells, Q.S., et al. (2018). Phenotype risk scores identify patients with unrecognized Mendelian disease patterns. *Science* *359*, 1233–1239.
- Robinson, P.N., Köhler, S., Bauer, S., Seelow, D., Horn, D., and Mundlos, S. (2008). The Human Phenotype Ontology: a tool for annotating and analyzing human hereditary disease. *Am. J. Hum. Genet.* *83*, 610–615.
- Köhler, S., Doelken, S.C., Mungall, C.J., Bauer, S., Firth, H.V., Bailleul-Forestier, I., Black, G.C., Brown, D.L., Brudno, M., Campbell, J., et al. (2014). The Human Phenotype Ontology project: linking molecular biology and disease through phenotype data. *Nucleic Acids Res.* *42*, D966–D974.
- Köhler, S., Vasilevsky, N.A., Engelstad, M., Foster, E., McMurry, J., Aymé, S., Baynam, G., Bello, S.M., Boerkoel, C.F., Boycott, K.M., et al. (2017). The Human Phenotype Ontology in 2017. *Nucleic Acids Res.* *45* (D1), D865–D876.
- Akawi, N., McRae, J., Ansari, M., Balasubramanian, M., Blyth, M., Brady, A.F., Clayton, S., Cole, T., Deshpande, C., Fitzgerald, T.W., et al.; DDD study (2015). Discovery of four recessive developmental disorders using probabilistic genotype and phenotype matching among 4,125 families. *Nat. Genet.* *47*, 1363–1369.
- Epi4K Consortium (2012). Epi4K: gene discovery in 4,000 genomes. *Epilepsia* *53*, 1457–1467.
- Epi4K Consortium (2017). Phenotypic analysis of 303 multiplex families with common epilepsies. *Brain* *140*, 2144–2156.
- Vögtle, F.N., Brändl, B., Larson, A., Pendziwiat, M., Friederich, M.W., White, S.M., Basinger, A., Kücükköse, C., Muhle, H., Jähn, J.A., et al. (2018). Mutations in PMPCB Encoding the Catalytic Subunit of the Mitochondrial Presequence Protease

- Cause Neurodegeneration in Early Childhood. *Am. J. Hum. Genet.* 102, 557–573.
27. Suls, A., Jaehn, J.A., Kecskés, A., Weber, Y., Weckhuysen, S., Craiu, D.C., Siekierska, A., Djémié, T., Afrikanova, T., Gormley, P., et al.; EuroEPINOMICS RES Consortium (2013). De novo loss-of-function mutations in CHD2 cause a fever-sensitive myoclonic epileptic encephalopathy sharing features with Dravet syndrome. *Am. J. Hum. Genet.* 93, 967–975.
  28. Ware, J.S., Samocha, K.E., Homsy, J., and Daly, M.J. (2015). Interpreting de novo Variation in Human Disease Using denovo-lyzeR. *Curr. Protoc. Hum. Genet.* 87, 7.25.21–27.25.15.
  29. Resnik, P. (1995). Using information content to evaluate semantic similarity in a taxonomy. In 14th International Joint Conference on Artificial Intelligence (San Francisco, CA, USA: Montreal, Morgan Kaufmann Publishers Inc.), pp. 448–453.
  30. R Core Team (2013). R: A Language and Environment for Statistical Computing. (R Foundation for Statistical Computing).
  31. Epilepsy Phenome/Genome Project Epi4K Consortium (2015). Copy number variant analysis from exome data in 349 patients with epileptic encephalopathy. *Ann. Neurol.* 78, 323–328.
  32. Jónsson, H., Sulem, P., Kehr, B., Kristmundsdóttir, S., Zink, F., Hjartarson, E., Hardarson, M.T., Hjorleifsson, K.E., Eggertsson, H.P., Gudjonsson, S.A., et al. (2017). Parental influence on human germline de novo mutations in 1,548 trios from Iceland. *Nature* 549, 519–522.
  33. Haendel, M.A., Chute, C.G., and Robinson, P.N. (2018). Classification, Ontology, and Precision Medicine. *N. Engl. J. Med.* 379, 1452–1462.
  34. Harkin, L.A., McMahon, J.M., Iona, X., Dibbens, L., Pelekanos, J.T., Zuberi, S.M., Sadleir, L.G., Andermann, E., Gill, D., Farrell, K., et al.; Infantile Epileptic Encephalopathy Referral Consortium (2007). The spectrum of SCN1A-related infantile epileptic encephalopathies. *Brain* 130, 843–852.
  35. de Lange, I.M., Gunning, B., Sonsma, A.C.M., van Gemert, L., van Kempen, M., Verbeek, N.E., Sinoo, C., Nicolai, J., Knoers, N.V.A.M., Koeleman, B.P.C., and Brilstra, E.H. (2019). Outcomes and comorbidities of SCN1A-related seizure disorders. *Epilepsy Behav.* 90, 252–259.
  36. Myers, K.A., Burgess, R., Afawi, Z., Damiano, J.A., Berkovic, S.F., Hildebrand, M.S., and Scheffer, I.E. (2017). De novo SCN1A pathogenic variants in the GEFS+ spectrum: Not always a familial syndrome. *Epilepsia* 58, e26–e30.
  37. Stamberger, H., Nikanorova, M., Willemsen, M.H., Accorsi, P., Angriman, M., Baier, H., Benkel-Herrenbrueck, I., Benoit, V., Budetta, M., Caliebe, A., et al. (2016). STXBP1 encephalopathy: A neurodevelopmental disorder including epilepsy. *Neurology* 86, 954–962.
  38. Sanders, S.J., Murtha, M.T., Gupta, A.R., Murdoch, J.D., Raubeson, M.J., Willsey, A.J., Ercan-Sencicek, A.G., DiLullo, N.M., Parikhshak, N.N., Stein, J.L., et al. (2012). De novo mutations revealed by whole-exome sequencing are strongly associated with autism. *Nature* 485, 237–241.
  39. Jiang, Y.H., Yuen, R.K., Jin, X., Wang, M., Chen, N., Wu, X., Ju, J., Mei, J., Shi, Y., He, M., et al. (2013). Detection of clinically relevant genetic variants in autism spectrum disorder by whole-genome sequencing. *Am. J. Hum. Genet.* 93, 249–263.
  40. Wolff, M., Johannesen, K.M., Hedrich, U.B.S., Masnada, S., Rubboli, G., Gardella, E., Lesca, G., Ville, D., Milh, M., Villard, L., et al. (2017). Genetic and phenotypic heterogeneity suggest therapeutic implications in SCN2A-related disorders. *Brain* 140, 1316–1336.
  41. Lim, E.T., Uddin, M., De Rubeis, S., Chan, Y., Kamumbu, A.S., Zhang, X., D’Gama, A.M., Kim, S.N., Hill, R.S., Goldberg, A.P., et al.; Autism Sequencing Consortium (2017). Rates, distribution and implications of postzygotic mosaic mutations in autism spectrum disorder. *Nat. Neurosci.* 20, 1217–1224.
  42. von Spiczak, S., Helbig, K.L., Shinde, D.N., Huether, R., Pendziwiat, M., Lourenço, C., Nunes, M.E., Sarco, D.P., Kaplan, R.A., Dlugos, D.J., et al.; Epi4K Consortium; and EuroEPINOMICS-RES NLES Working Group (2017). *DNM1* encephalopathy: A new disease of vesicle fission. *Neurology* 89, 385–394.
  43. Singh, N.A., Charlier, C., Stauffer, D., DuPont, B.R., Leach, R.J., Melis, R., Ronen, G.M., Bjerre, I., Quattlebaum, T., Murphy, J.V., et al. (1998). A novel potassium channel gene, *KCNQ2*, is mutated in an inherited epilepsy of newborns. *Nat. Genet.* 18, 25–29.
  44. Charlier, C., Singh, N.A., Ryan, S.G., Lewis, T.B., Reus, B.E., Leach, R.J., and Leppert, M. (1998). A pore mutation in a novel KQT-like potassium channel gene in an idiopathic epilepsy family. *Nat. Genet.* 18, 53–55.
  45. Weckhuysen, S., Mandelstam, S., Suls, A., Audenaert, D., Deconinck, T., Claes, L.R., Deprez, L., Smets, K., Hristova, D., Yordanova, I., et al. (2012). *KCNQ2* encephalopathy: emerging phenotype of a neonatal epileptic encephalopathy. *Ann. Neurol.* 71, 15–25.

## Supplemental Data

### **Semantic Similarity Analysis Reveals**

### **Robust Gene-Disease Relationships**

### **in Developmental and Epileptic Encephalopathies**

**Peter D. Galer, Shiva Ganesan, David Lewis-Smith, Sarah E. McKeown, Manuela Pendziwiat, Katherine L. Helbig, Colin A. Ellis, Annika Rademacher, Lacey Smith, Annapurna Poduri, Simone Seiffert, Sarah von Spiczak, Hiltrud Muhle, Andreas van Baalen, NCEE Study Group, EPGP Investigators, EuroEPINOMICS-RES Consortium, Genomics Research and Innovation Network, Rhys H. Thomas, Roland Krause, Yvonne Weber, and Ingo Helbig**



# Supplemental Figures

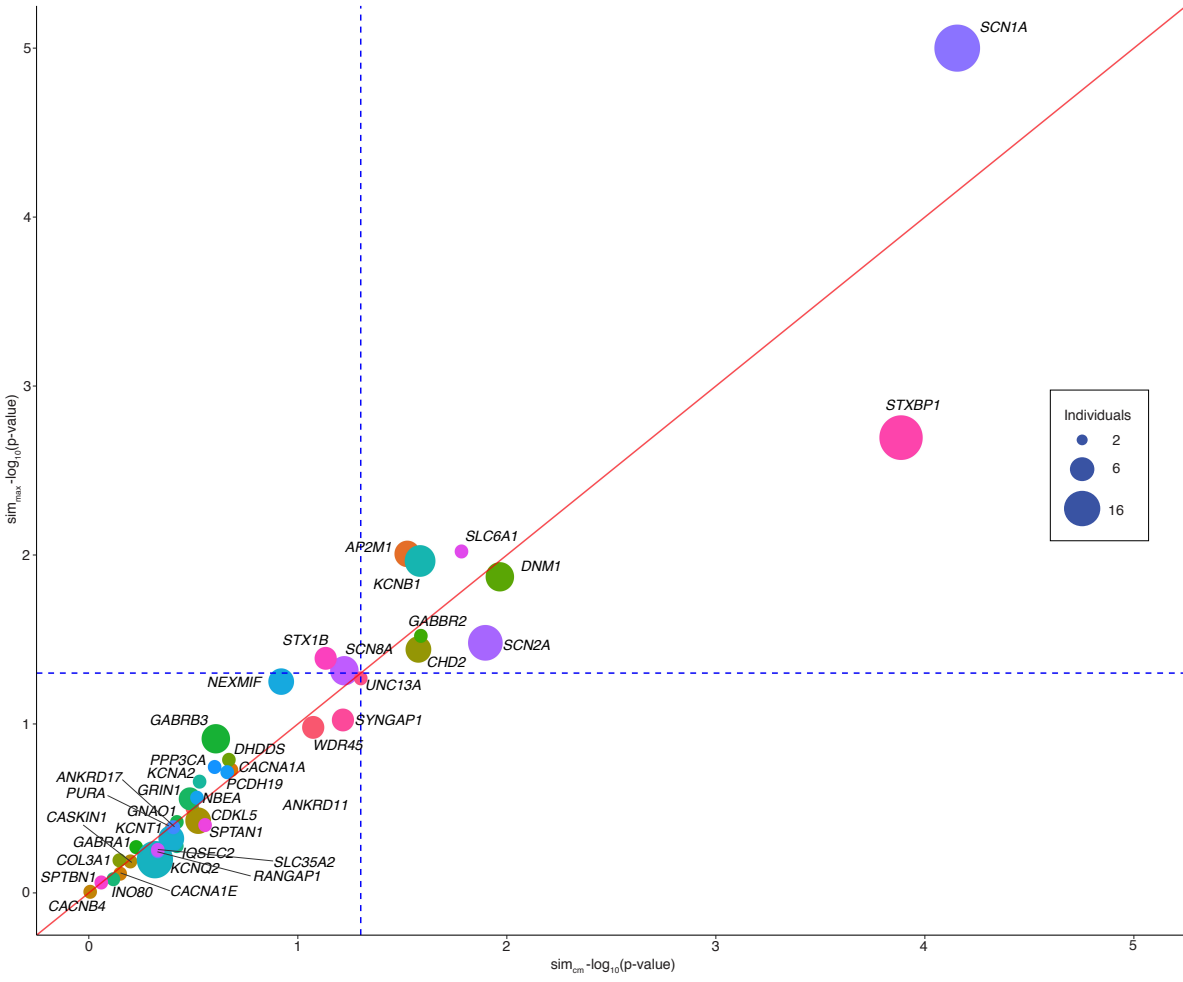

**Figure S1. Comparison between  $sim_{cm}$  and  $sim_{max}$  algorithms**

Gene-specific phenotypic similarity between both algorithms is correlated. Point size signifies the number of individuals with a de novo mutation in a specific gene, blue lines denote the  $-\log_{10}(0.05)$  threshold.

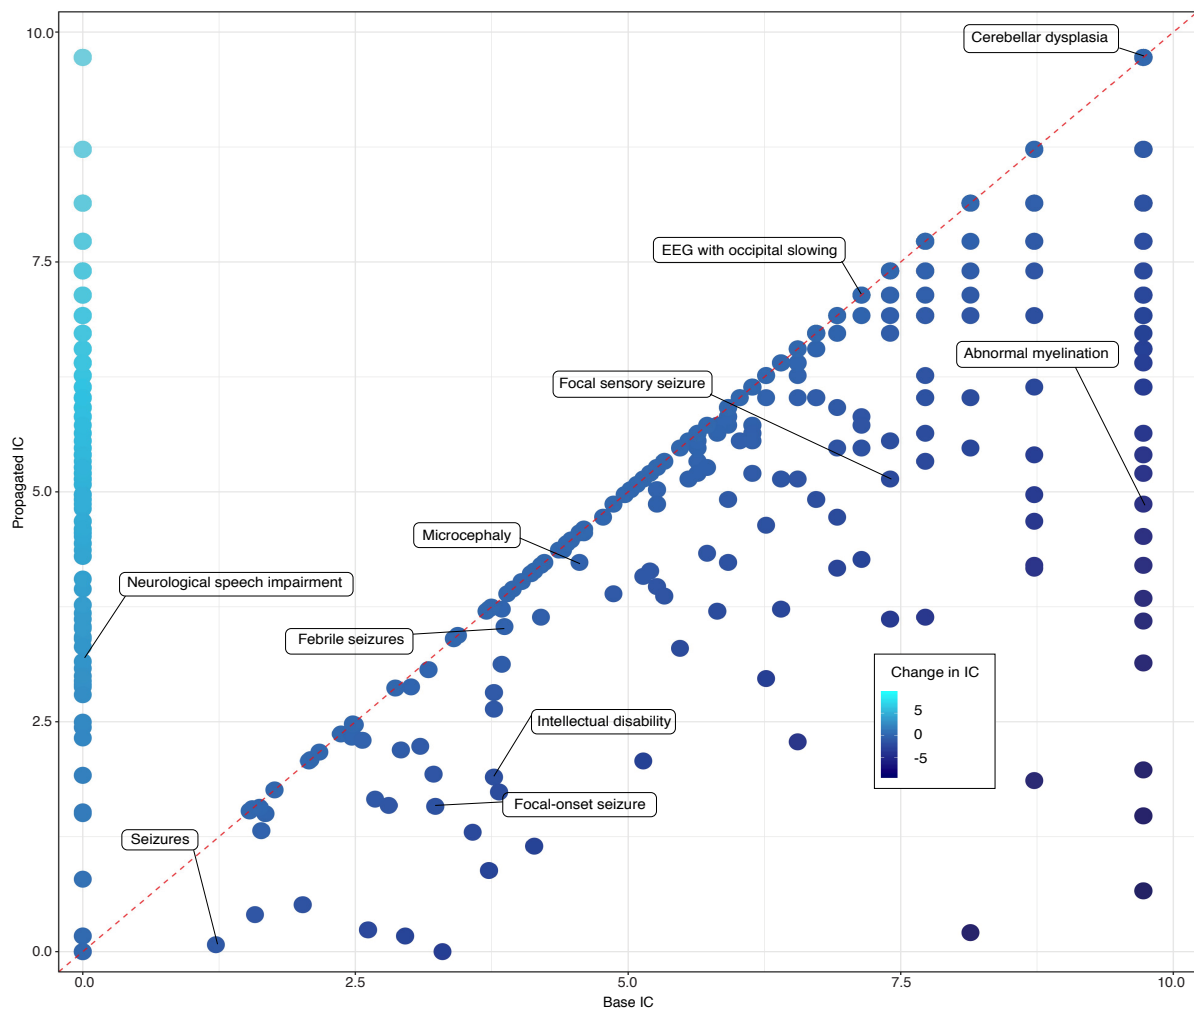

**Figure S2. Information Content (IC) of HPO terms before and after propagation**

Propagation of assigned HPO terms refers to the addition of all higher-level HPO terms within the ontology. The plot compares Information Content (IC) of all HPO terms in the cohort before and after propagation. Since IC is defined as the  $-\log_2$  of the term frequency within the cohort, IC of specific terms after propagation either remains constant or decreases. A decrease in IC is observed if a specific HPO terms becomes more frequent due to the propagation of child terms. In addition, after propagation a significant number of HPO terms are generated that were previously not assigned (see HPO terms with  $x=0$ ). Overall, propagation significantly adjusts the frequency of HPO terms in the cohort, specifically for higher-level terms that are only assigned infrequently and therefore appear artificially rare.

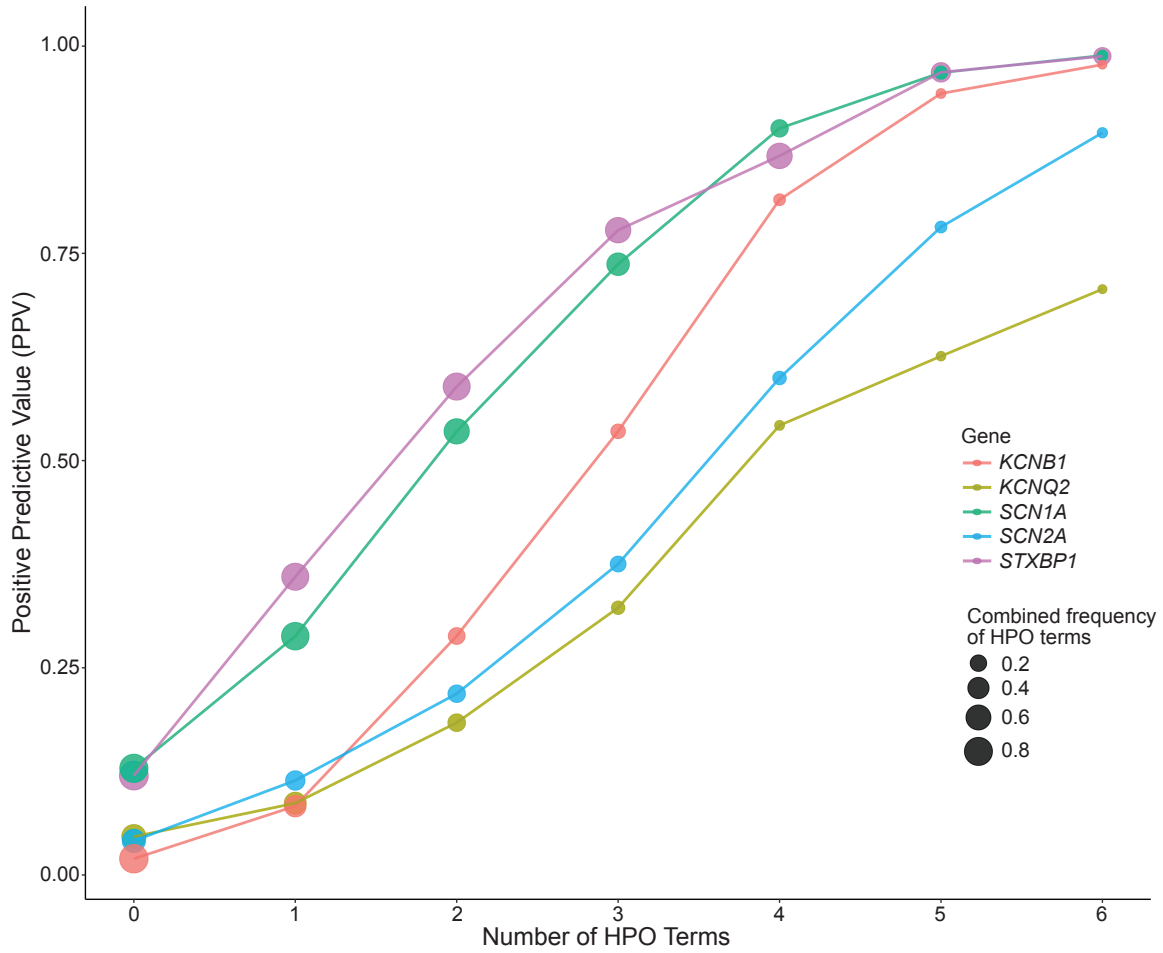

**Figure S3. Growth of positive predictive value (PPV) with the addition of HPO terms**

This figure displays the subsequent growth of the PPV after the addition of HPO terms to the five genetic etiologies with the fastest growth rate. Each color represents a different gene, and the size of the dots indicates the combined frequency of the HPO terms up to that point in that particular gene. *KCNB1*, *SCN1A*, and *STXBP1* require just 5 terms or less to reach a PPV of at least 80%.

Figure S4 A

Phenotree of AP2M1

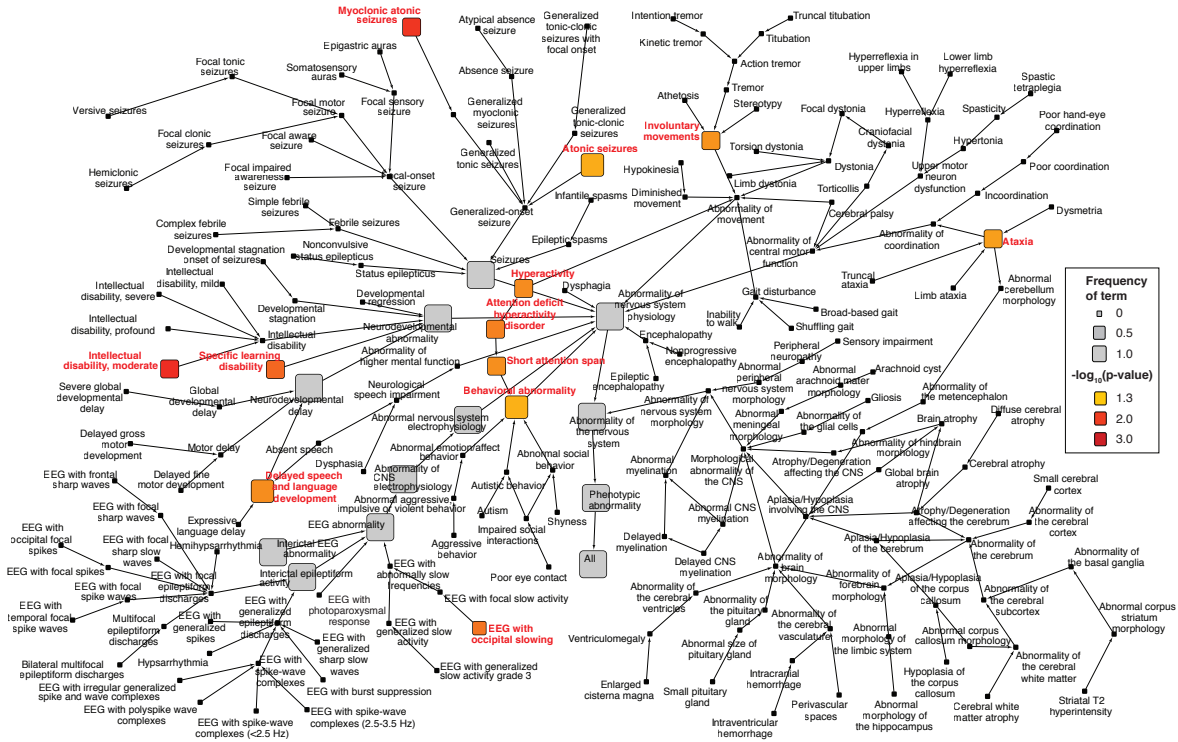

Phenogram of AP2M1

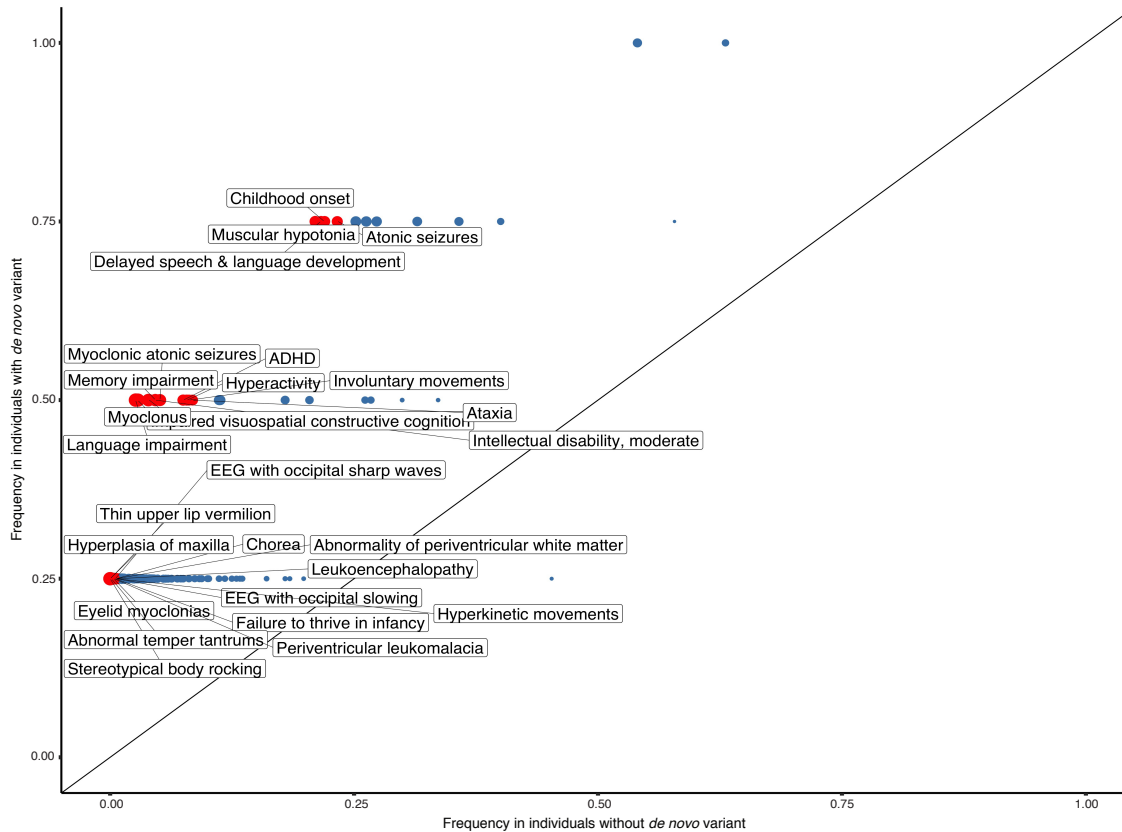





Figure S4 D

Phentree of NEXMIF

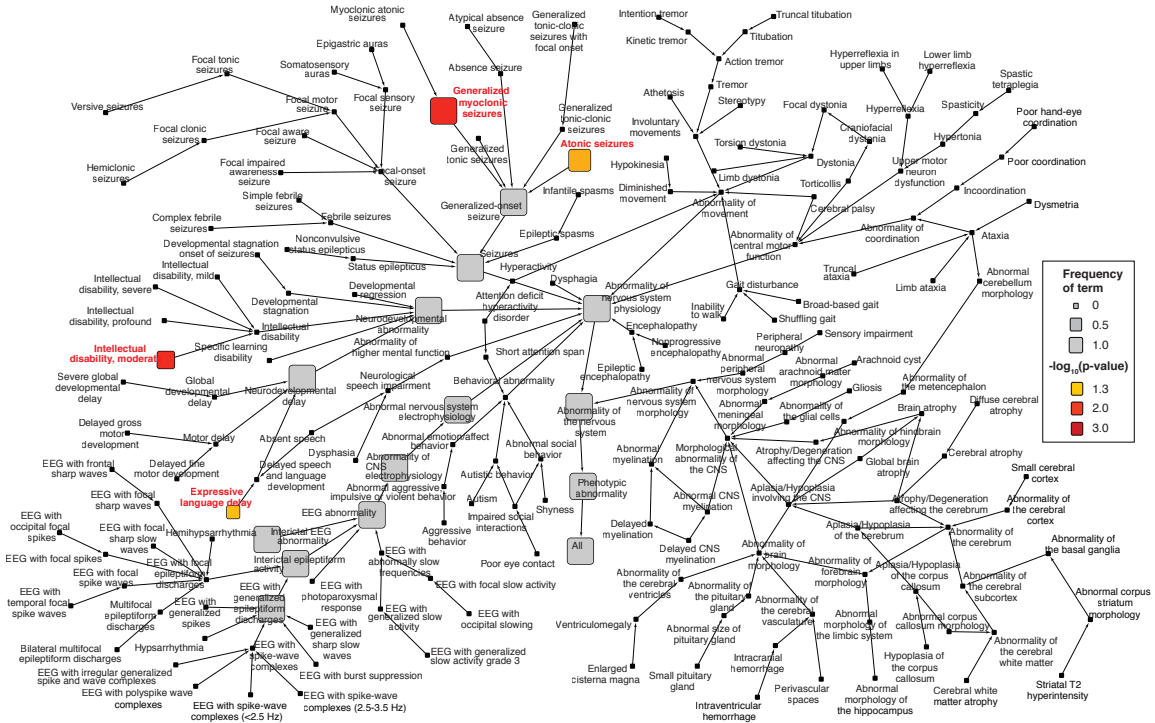

Phenogram of NEXMIF

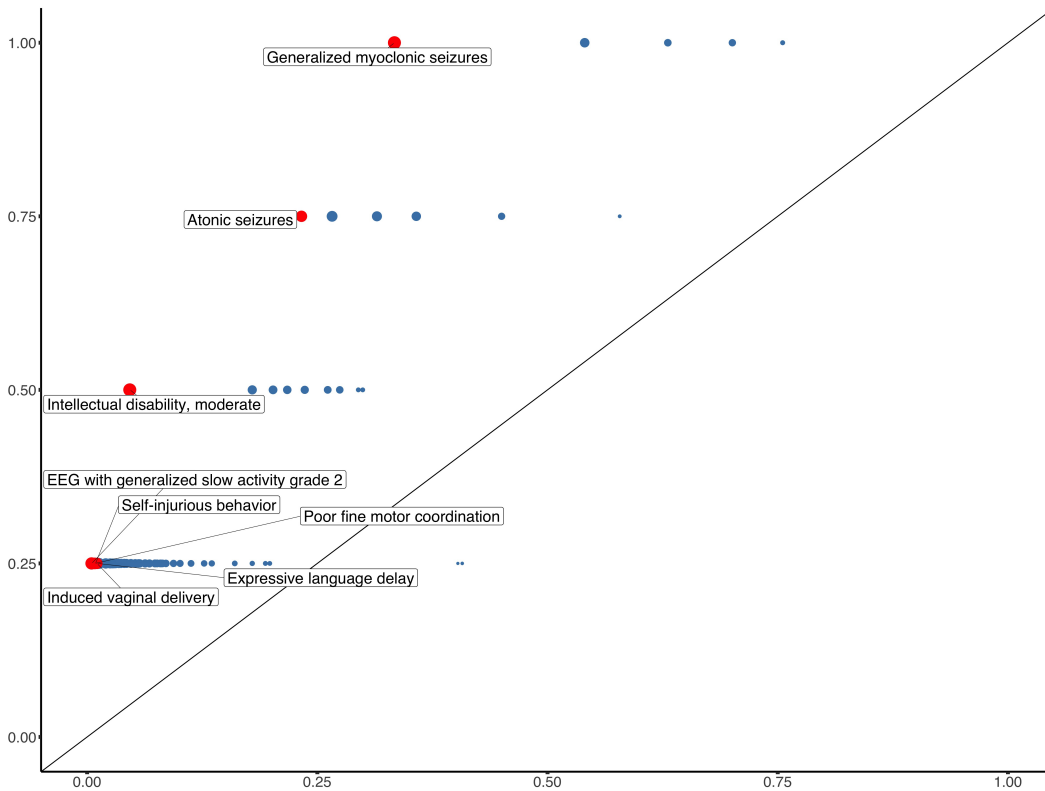







**Figure S4. Phenograms and Phenotrees of six genetic etiologies with 20 de novo variants**

(A)-(F) The graphs display frequencies of HPO terms in AP2M1, DNM1, CHD2, SCN8A, STX1B, and NEXMIF compared to the overall cohort. Red dots indicate significant associations ( $p < 0.05$ ) between HPO terms and specific genes, the size of the dot denotes the degree of significance displayed as  $-\log_{10}(p\text{-value})$ . Significant associations present in 15% of individuals or more with a specific gene are labeled. Parent terms that displayed redundant information were removed.

# Supplemental Note

## Comparison of $\text{sim}_{\text{max}}$ and $\text{sim}_{\text{cm}}$ algorithms

In our study, we used two similarity algorithms to assess the phenotypic relatedness between individuals, the  $\text{sim}_{\text{max}}$  and  $\text{sim}_{\text{cm}}$ . In a previous study, we have used the  $\text{sim}_{\text{max}}$  algorithm to provide evidence for the role of *AP2M1* in human disease. While conceptually related, both algorithms emphasize different features of the HPO and the following hypothetical example demonstrate the emphasis that both algorithms provide to different features in the dataset. For the calculation of Information Content (IC) and similarity, the observed values in our dataset of 846 individuals is used.

### Assignment of HPO terms for two individuals

For our example, we assume that two individuals ( $P_1$ ,  $P_2$ ) are assigned the following HPO terms ([Table S7](#)). The assigned HPO terms are “base” HPO terms, e.g. inclusion of higher-level, ancestral HPO terms through propagation has not yet been performed.

| HPO terms assigned in individual $P_1$                  | HPO terms assigned in individual $P_2$   |
|---------------------------------------------------------|------------------------------------------|
| Focal aware seizure<br>(HP:0002349)                     | Focal-onset seizure<br>(HP:0007359)      |
| Focal clonic seizure<br>(HP:0002266)                    | Neurodevelopmental delay<br>(HP:0012758) |
| Mild global developmental delay (HP:0011342)            |                                          |
| Delayed speech and language development<br>(HP:0000750) |                                          |

**Table S7.** Assigned HPO terms for two hypothetical individuals to demonstrate the differences between the  $\text{sim}_{\text{max}}$  and  $\text{sim}_{\text{cm}}$  algorithms.

## Relative position of HPO terms within the HPO tree

**Figure S5** shows the relative position of the HPO terms within the overall ontological tree. From this illustration, it is apparent that some of the HPO terms assigned to both individuals refer to related concepts within the HPO. For example, “Focal aware seizure” (HP:0002349) and “Focal clonic seizure” (HP:0002266) assigned in individual P<sub>1</sub> are both child terms of “Focal-onset seizure” (HP:0007359) assigned in individual P<sub>2</sub>. It can be seen from **Figure S5** and **Figure S6** that P<sub>1</sub> is assigned more specific terms and that P<sub>2</sub> is assigned higher-level terms.

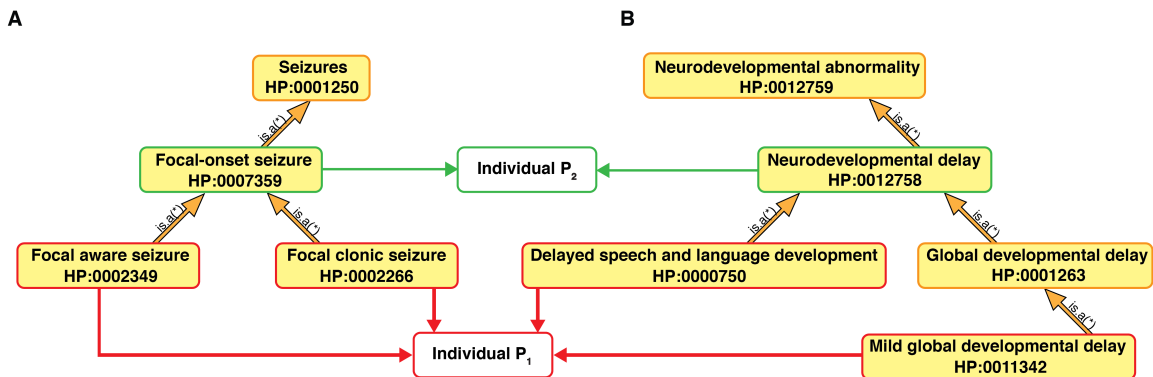

**Figure S5.** Structure of the HPO with two subbranches with superimposed terms that are assigned to both individuals P<sub>1</sub> (red) and P<sub>2</sub> (green).

## Information content for assigned and propagated terms

Based on the structure of the HPO, inclusion of higher-level HPO terms generates a list of extended phenotypic terms for both individuals as shown in **Table S8**. Information Content (IC) is generated as the  $-\log_2$  of the term frequency and the initially assigned (“base”) terms are labelled in red (pat1) and green (pat2). With decreasing specificity of the terms within the structure of the HPO, terms become more frequent and the IC decreases.

| <b>P<sub>1</sub> propagated HPO terms</b>                                | <b>P<sub>2</sub> propagated HPO terms</b>                      |
|--------------------------------------------------------------------------|----------------------------------------------------------------|
| All<br>(HP:0000001; IC=0)                                                | All<br>(HP:0000001; IC=0)                                      |
| Phenotypic abnormality<br>(HP:0000118; IC=0)                             | Phenotypic abnormality<br>(HP:0000118; IC=0)                   |
| Abnormality of the nervous system<br>(HP:0000707; IC=0)                  | Abnormality of the nervous system<br>(HP:0000707; IC=0)        |
| <b>Delayed speech and language development<br/>(HP:0000750; IC=2.19)</b> | Seizures<br>(HP:0001250; IC=0.08)                              |
| Seizures<br>(HP:0001250; IC=0.08)                                        | <b>Focal-onset seizure<br/>(HP:0007359; IC=1.58)</b>           |
| Global developmental delay<br>(HP:0001263; IC=1.32)                      | Abnormality of nervous system physiology<br>(HP:0012638; IC=0) |
| Focal clonic seizures<br>(HP:0002266; IC=3.64)                           | <b>Neurodevelopmental delay<br/>(HP:0012758; IC=0.88)</b>      |
| <b>Focal aware seizure<br/>(HP:0002349; IC=5.55)</b>                     | Neurodevelopmental abnormality<br>(HP:0012759; IC=0.66)        |
| <b>Focal-onset seizure<br/>(HP:0007359; IC=1.58)</b>                     |                                                                |
| Focal motor seizure<br>(HP:0011153; IC=2.64)                             |                                                                |
| <b>Mild global developmental delay<br/>(HP:0011342; IC=5.92)</b>         |                                                                |
| Abnormality of nervous system physiology<br>(HP:0012638; IC=0)           |                                                                |
| Neurodevelopmental delay<br>(HP:0012758; IC=0.88)                        |                                                                |
| Neurodevelopmental abnormality<br>(HP:0012759; IC=0.66)                  |                                                                |

**Table S8.** Propagated HPO terms for both P<sub>1</sub> and P<sub>2</sub> with the initially assigned terms in bold and red (P<sub>1</sub>) or green (P<sub>2</sub>). The highest-level terms in the HPO (“All”; HP:0000001 and Phenotypic abnormality”; HP:0000118) have an Information Content of zero, indicating that these terms are present in all individuals.

## Phenotypic similarity assessed by the $\text{sim}_{\text{max}}$ algorithm

An intuitive way to conceptualize the  $\text{sim}_{\text{max}}$  algorithm is to place the assigned HPO terms for  $P_1$  and  $P_2$  on a 2 x 2 matrix with the rows representing the terms assigned to  $P_1$  and the columns representing the terms assigned to  $P_2$  (Figure S6).

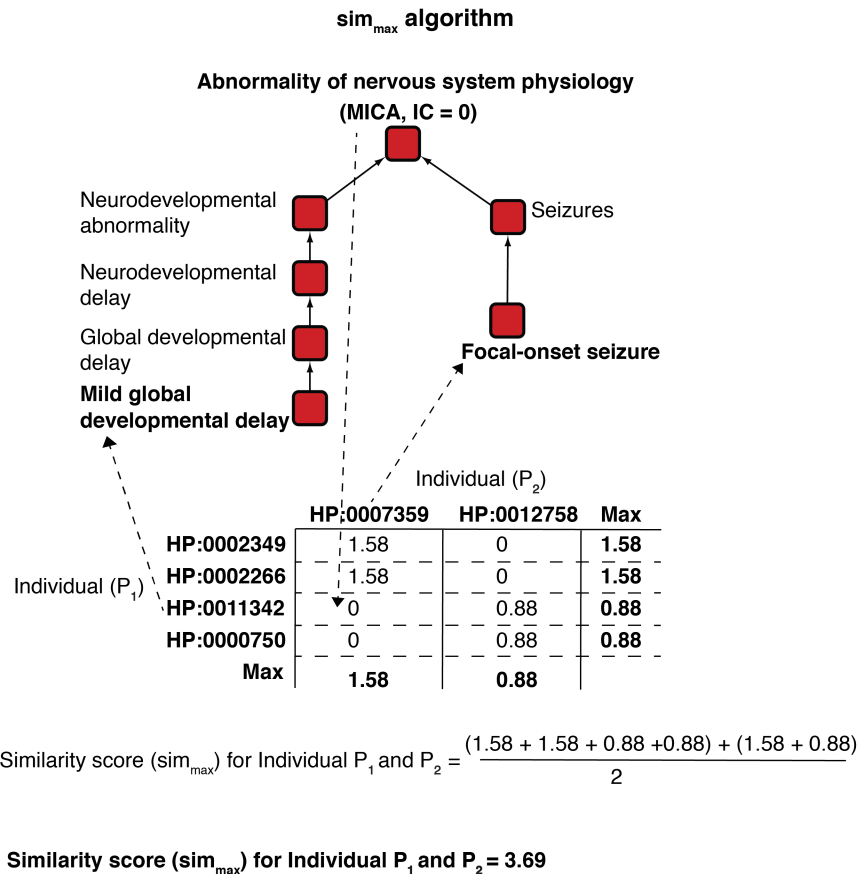

**Figure S6.** Calculating the  $\text{sim}_{\text{max}}$  score for individuals  $P_1$  and  $P_2$  using the assigned phenotypes from Table S7 including “Focal aware seizure” (HP:0002349), “Focal clonic seizure” (HP:0002266), “Mild global developmental delay” (HP:0011342) for  $P_1$ , “Delayed speech and language development” (HP:0000750) and “Focal-onset seizure” (HP:0007359) and “Neurodevelopmental delay” (HP:0012758) for  $P_2$ . The  $\text{sim}_{\text{max}}$  algorithm assesses the Most Informative Common Ancestor (MICA) for each term combination and sums up the row-wise ( $P_1$ ) and column-wise ( $P_2$ ) maxima, thereby determining the similarity of  $P_1 \rightarrow P_2$  and  $P_2 \rightarrow P_1$ . For the final similarity score, both the row-wise and column-wise similarity are averaged.

## Phenotypic similarity assessed by the $\text{sim}_{\text{cm}}$ algorithm

In contrast to determining the MICA for each term combination, the  $\text{sim}_{\text{cm}}$  algorithm assesses the Information Content of all HPO terms shared by  $P_1$  and  $P_2$  using the propagated HPO dataset. This is shown in [Table S9](#), which is derived from [Table S8](#).

| <b>P<sub>1</sub> propagated HPO terms</b>                                | <b>P<sub>2</sub> propagated HPO terms</b>                      | <b>Overlap</b>                                                 |
|--------------------------------------------------------------------------|----------------------------------------------------------------|----------------------------------------------------------------|
| All<br>(HP:0000001; IC=0)                                                | All<br>(HP:0000001; IC=0)                                      | All<br>(HP:0000001; IC=0)                                      |
| Phenotypic abnormality<br>(HP:0000118; IC=0)                             | Phenotypic abnormality<br>(HP:0000118; IC=0)                   | Phenotypic abnormality<br>(HP:0000118; IC=0)                   |
| Abnormality of the nervous system<br>(HP:0000707; IC=0)                  | Abnormality of the nervous system<br>(HP:0000707; IC=0)        | Abnormality of the nervous system<br>(HP:0000707; IC=0)        |
| Delayed speech and language development<br>(HP:0000750; IC=2.19)         |                                                                |                                                                |
| Seizures<br>(HP:0001250; IC=0.08)                                        | Seizures<br>(HP:0001250; IC=0.08)                              | Seizures<br>(HP:0001250; IC=0.08)                              |
| Global developmental delay<br>(HP:0001263; IC=1.32)                      |                                                                |                                                                |
| Focal clonic seizures<br>(HP:0002266; IC=3.64)                           |                                                                |                                                                |
| Focal aware seizure<br>(HP:0002349; IC=5.55)                             |                                                                |                                                                |
| Focal-onset seizure<br>(HP:0007359; IC=1.58)                             | Focal-onset seizure<br>(HP:0007359; IC=1.58)                   | Focal-onset seizure<br>(HP:0007359; IC=1.58)                   |
| Focal motor seizure<br>(HP:0011153; IC=2.64)                             |                                                                |                                                                |
| Mild global developmental delay<br>(HP:0011342; IC=5.92)                 |                                                                |                                                                |
| Abnormality of nervous system physiology<br>(HP:0012638; IC=0)           | Abnormality of nervous system physiology<br>(HP:0012638; IC=0) | Abnormality of nervous system physiology<br>(HP:0012638; IC=0) |
| Neurodevelopmental delay<br>(HP:0012758; IC=0.88)                        | Neurodevelopmental delay<br>(HP:0012758; IC=0.88)              | Neurodevelopmental delay<br>(HP:0012758; IC=0.88)              |
| Neurodevelopmental abnormality<br>(HP:0012759; IC=0.66)                  | Neurodevelopmental abnormality<br>(HP:0012759; IC=0.66)        | Neurodevelopmental abnormality<br>(HP:0012759; IC=0.66)        |
|                                                                          |                                                                |                                                                |
| <b>Total Similarity<br/>(adding IC values for overlapping HPO terms)</b> |                                                                | <b>0 + 0 + 0 + 0.08 + 1.58 + 0<br/>+ 0.88 + 0.66<br/>= 3.2</b> |

**Table S9.** Calculating the  $\text{sim}_{\text{cm}}$  score from the overlap of propagated HPO terms between  $P_1$  and  $P_2$ . Given that both HPO terms initially assigned to  $P_2$  were ancestral terms of the four HPO terms assigned to  $P_1$ , both assigned terms for  $P_2$  are part of the overlapping group of HPO terms. However, as the propagation also includes higher level terms, HPO terms including “Seizures” (HP:0001250; IC=0.08) and “Neurodevelopmental abnormality” (HP:0012759; IC=0.66) contribute to the final score, even though these terms had not been initially assigned. This makes this similarity measure vulnerable to changes in the overall granularity of the HPO within specific sub-branches.

## Factors affecting similarities assessed by the $\text{sim}_{\text{max}}$ and $\text{sim}_{\text{cm}}$ algorithm

### *Effect of annotation density*

In our example,  $P_1$  was assigned two specific focal seizure terms, including “Focal aware seizure” (HP:0002349) and “Focal clonic seizure” (HP:0002266), whereas  $P_2$  was only assigned a single higher-level HPO term for focal seizures, namely “Focal-onset seizure” (HP:0007359). Within the  $\text{sim}_{\text{max}}$  algorithm, both focal seizures types (HP:0002349, HP:0002266) contribute to the overall similarity, whereas the  $\text{sim}_{\text{cm}}$  algorithm would only capture the IC of the more general focal seizure term (HP:0007359). For example, if one specific focal seizure term were to be removed from  $P_1$ ,  $\text{sim}_{\text{max}}$  would decrease, whereas  $\text{sim}_{\text{cm}}$  would remain the same. Likewise, if another specific focal seizure term were to be added,  $\text{sim}_{\text{max}}$  would increase, while  $\text{sim}_{\text{cm}}$  would remain constant. **The  $\text{sim}_{\text{max}}$  algorithm increases similarity with the addition of assigned HPO terms and, as a distinct property from the  $\text{sim}_{\text{cm}}$  algorithm, increases similarity when multiple child terms are annotated.** Accordingly,  $\text{sim}_{\text{max}}$  is affected by the annotation density of the assigned HPO terms, whereas  $\text{sim}_{\text{cm}}$  removes this effect as HPO terms are de-duplicated after propagation and only overlapping ancestral terms are considered.

### *Effect of HPO granularity*

In our example, the  $\text{sim}_{\text{cm}}$  algorithm included higher-level terms in the assessment of similarity that are dependent on the structure of the HPO. The  $\text{sim}_{\text{max}}$  algorithm is in principle independent of the overall structure of the overall ontology, as it only assesses the Information Content of the Most Information Common Ancestors (MICA), independent of how deep these ancestral terms are located within the HPO tree. However, the  $\text{sim}_{\text{cm}}$



algorithm includes the information content of all propagated HPO terms and is therefore dependent on the local of the assigned terms within the HPO structure. For example, if another redundant HPO term would be placed between “Neurodevelopmental delay” (HP:0012758) and “Neurodevelopmental abnormality” (HP:0012759) that is equivalent to “Neurodevelopmental delay” (HP:0012758), this new, redundant term would also have an IC of 0.88. Such a “spacer term” could be introduced based on theoretical considerations on how to structure phenotypes or novel disease classifications suggested by professional organizations that aim at providing a higher granularity for phenotype assignment within the HPO in future studies. However, such a new, interspersed term would increase the overall similarity assessed through the  $sim_{cm}$  algorithm. The results of the  $sim_{max}$  algorithm remain unchanged. Likewise, if a term within the HPO structure is considered redundant and is removed, the  $sim_{cm}$  algorithm would generate a lower similarity. In our example, this would be the hypothetical situation in which “Neurodevelopmental delay” (HP:0012758) and “Neurodevelopmental abnormality” (HP:0012759) are collapsed into a single HPO term. **Accordingly, the  $sim_{cm}$  algorithm is dependent on the overall granularity of the HPO with higher granularity in branches with commonly assigned terms generating higher similarities.** However, the  $sim_{max}$  algorithm is not affected by the granularity of the HPO structure itself.

## Simulating the recognition of Rett Syndrome

In the introduction of our manuscript, we used the clinical recognition of Rett Syndrome in 1954 as an example of how distinct clinical features may significantly stand out sufficiently to be recognized. We attempted to simulate this historical example by adding six hypothetical individuals with Rett Syndrome to our cohort with various combinations of clinical features that include three different scenarios ([Table S10](#)).

| Scenario 1 (n=1 term)                       | Scenario 2 (n=2 terms)                      | Scenario 4 (n=4 terms)                      |
|---------------------------------------------|---------------------------------------------|---------------------------------------------|
| Stereotypical hand wringing<br>(HP:0012171) | Stereotypical hand wringing<br>(HP:0012171) | Stereotypical hand wringing<br>(HP:0012171) |
|                                             | Developmental regression<br>(HP:0002376)    | Developmental regression<br>(HP:0002376)    |
|                                             |                                             | Absent speech<br>(HP:0001344)               |
|                                             |                                             | Apraxia<br>(HP:0002186)                     |

**Table S10.** Combination of HPO terms in simulated individuals with Rett Syndrome. For the similarity analysis, the existing frequencies of these phenotypes in the cohort were used. The phenotype “Stereotypical hand wringing” (HP:0012171) had not been assigned in the cohort and assigned an Information Content of 8.7 for the analysis based on the estimated frequency of 2/846. The IC for “Stereotypical hand wringing” (HP:0012171) was kept constant for n=2, n=4, n=6 patients. For the three other HPO terms (“Developmental regression” HP:0002376, “Absent speech” HP:0001344, “Apraxia” HP:0002186), the existing frequencies in the cohort of 846 individuals was used.

For the simulation, we assessed the combination of one term (Scenario 1), two terms (Scenario 2), and four terms (Scenario 3) in n=2, n=4, and n=6 individuals, using the  $\text{sim}_{\text{max}}$  algorithm. [Table S11](#) shows the results obtained for the nine combinations of HPO term numbers and number of individuals.

| Scenario   | Number of individuals | Number of HPO terms | Median similarity using $sim_{max}$ | p-value      |
|------------|-----------------------|---------------------|-------------------------------------|--------------|
| Scenario 1 | 2                     | 1                   | 8.7                                 | 0.283        |
| Scenario 1 | 2                     | 2                   | 11.6                                | 0.180        |
| Scenario 1 | 2                     | 4                   | 19.9                                | 0.056        |
| Scenario 2 | 4                     | 1                   | 8.7                                 | 0.192        |
| Scenario 2 | 4                     | 2                   | 11.6                                | 0.087        |
| Scenario 2 | 4                     | 4                   | 19.9                                | <b>0.010</b> |
| Scenario 3 | 6                     | 1                   | 8.7                                 | 0.138        |
| Scenario 3 | 6                     | 2                   | 11.6                                | <b>0.045</b> |
| Scenario 3 | 6                     | 4                   | 19.9                                | <b>0.002</b> |

**Table S11.** Simulation of phenotypic similarity for Rett Syndrome using combinations of number of individuals (n=2, n=4, n=6) and number of HPO terms (n=1, n=2, n=4). With increasing number of individuals and HPO terms, the phenotypic similarity between individuals becomes significant.

Examining all combinations of number of individuals and number of terms, we observe that phenotypic significance is achieved once more terms or more individuals are included. For n=6 individuals, the phenotypic similarity is significant for n=2 terms (p=0.05) and n=4 HPO terms (p=0.002). The terms assigned to individuals are “Stereotypical hand wringing” (HP:0012171), “Developmental regression” (HP:0002376), “Absent speech” (HP:0001344), and “Apraxia” (HP:0002186). This hypothetical example highlights that the phenotypic similarity approach used in our study can recapitulate the clinical recognition of specific phenotypes such as Rett Syndrome. Mapping the overall phenotypic similarity onto the overall distribution of median phenotypic similarities in n=6 individuals demonstrates how an increasing number of Rett Syndrome-related HPO terms results in increasing phenotypic similarity that shifts to the right with the addition of more phenotypic terms ([Figures S7](#)).

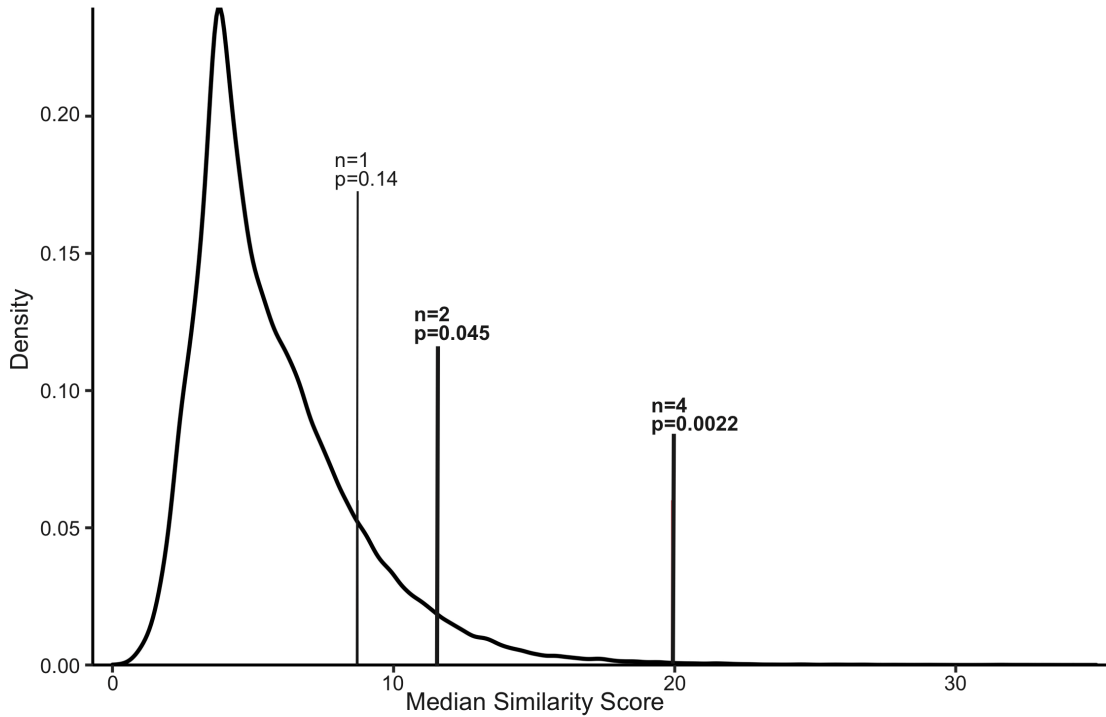

**Figure S7.** Simulation of phenotypic similarity for Rett Syndrome for  $n=6$  individuals with  $n=1$ ,  $n=2$ , and  $n=4$  phenotypic terms. The curve indicates the distribution of median similarity scores for  $n=6$  individuals within the cohort of 846 individuals included in the current study. With increasing number of Rett Syndrome-related HPO terms, the median phenotypic similarity between six simulated individuals with Rett Syndrome increases and moves further to the right of the curve. A p-value of 0.0022 indicates that a median similarity of 19.9 or higher is only observed in 220/100,000 randomly assessed combinations of six individuals in the cohort of 846 individuals, thereby generating an exact p-value of 0.0022. This example highlights the ability of phenotypic similarity approaches to recapitulate historical examples where constellations of phenotypic features were correctly mapped to a common genetic etiology.

| Gene          | PPV  | Terms (n) | Cumulative frequency | Individuals with etiology | HPO ID     | HPO term                                 | Freq. |
|---------------|------|-----------|----------------------|---------------------------|------------|------------------------------------------|-------|
| <b>DNM1</b>   | 0.80 | 4         | 0.41                 | 5                         | HP:0012444 | Brain atrophy                            | 0.80  |
|               |      |           |                      |                           | HP:0007367 | Atrophy/Degeneration affecting the CNS   | 0.80  |
|               |      |           |                      |                           | HP:0002977 | Aplasia/Hypoplasia involving the CNS     | 0.80  |
|               |      |           |                      |                           | HP:0010847 | EEG with spike-wave complexes (<2.5 Hz)  | 0.80  |
| <b>KCNB1</b>  | 0.81 | 5         | 0.07                 | 6                         | HP:0011442 | Abnormality of central motor function    | 0.83  |
|               |      |           |                      |                           | HP:0011443 | Abnormality of coordination              | 0.50  |
|               |      |           |                      |                           | HP:0000729 | Autistic behavior                        | 0.50  |
|               |      |           |                      |                           | HP:0000708 | Behavioral abnormality                   | 0.67  |
| <b>SCN1A</b>  | 0.90 | 5         | 0.23                 | 16                        | HP:0000234 | Abnormality of the head                  | 0.50  |
|               |      |           |                      |                           | HP:0002373 | Febrile seizures                         | 0.81  |
|               |      |           |                      |                           | HP:0002069 | Generalized tonic-clonic seizures        | 0.94  |
|               |      |           |                      |                           | HP:0003593 | Infantile onset                          | 0.81  |
| <b>STXBP1</b> | 0.87 | 5         | 0.63                 | 14                        | HP:0010850 | EEG with spike-wave complexes            | 0.75  |
|               |      |           |                      |                           | HP:0011153 | Focal motor seizure                      | 0.50  |
|               |      |           |                      |                           | HP:0002167 | Neurological speech impairment           | 0.86  |
|               |      |           |                      |                           | HP:0000750 | Delayed speech and language development  | 0.86  |
| <b>AP2M1</b>  | 0.86 | 6         | 0.18                 | 4                         | HP:0001263 | Global developmental delay               | 1.00  |
|               |      |           |                      |                           | HP:0011446 | Abnormality of higher mental function    | 0.86  |
|               |      |           |                      |                           | HP:0012758 | Neurodevelopmental delay                 | 1.00  |
|               |      |           |                      |                           | HP:0001252 | Muscular hypotonia                       | 0.75  |
|               |      |           |                      |                           | HP:0000750 | Delayed speech and language development  | 0.75  |
|               |      |           |                      |                           | HP:0011463 | Childhood onset                          | 0.75  |
| <b>CHD2</b>   | 0.84 | 6         | 0.12                 | 4                         | HP:0010819 | Atonic seizures                          | 0.75  |
|               |      |           |                      |                           | HP:0000708 | Behavioral abnormality                   | 0.75  |
|               |      |           |                      |                           | HP:0003808 | Abnormal muscle tone                     | 0.75  |
|               |      |           |                      |                           | HP:0002133 | Status epilepticus                       | 0.75  |
|               |      |           |                      |                           | HP:0011463 | Childhood onset                          | 0.75  |
| <b>GABRB3</b> | 0.85 | 7         | 0.03                 | 5                         | HP:0000708 | Behavioral abnormality                   | 0.75  |
|               |      |           |                      |                           | HP:0001249 | Intellectual disability                  | 0.75  |
|               |      |           |                      |                           | HP:0002373 | Febrile seizures                         | 0.50  |
|               |      |           |                      |                           | HP:0002123 | Generalized myoclonic seizures           | 0.75  |
|               |      |           |                      |                           | HP:0100022 | Abnormality of movement                  | 0.80  |
|               |      |           |                      |                           | HP:0003593 | Infantile onset                          | 0.80  |
|               |      |           |                      |                           | HP:0010847 | EEG with spike-wave complexes (<2.5 Hz)  | 0.60  |
| <b>KCNT1</b>  | 0.87 | 7         | 0.01                 | 4                         | HP:0000708 | Behavioral abnormality                   | 0.60  |
|               |      |           |                      |                           | HP:0001298 | Encephalopathy                           | 0.40  |
|               |      |           |                      |                           | HP:0001263 | Global developmental delay               | 0.80  |
|               |      |           |                      |                           | HP:0007270 | Atypical absence seizure                 | 0.40  |
|               |      |           |                      |                           | HP:0012444 | Brain atrophy                            | 0.50  |
|               |      |           |                      |                           | HP:0007367 | Atrophy/Degeneration affecting the CNS   | 0.50  |
|               |      |           |                      |                           | HP:0007359 | Focal-onset seizure                      | 0.75  |
| <b>SCN2A</b>  | 0.90 | 7         | 0.04                 | 8                         | HP:0002977 | Aplasia/Hypoplasia involving the CNS     | 0.50  |
|               |      |           |                      |                           | HP:0002060 | Abnormality of the cerebrum              | 0.50  |
|               |      |           |                      |                           | HP:0010841 | Multifocal epileptiform discharges       | 0.50  |
|               |      |           |                      |                           | HP:0100547 | Abnormality of forebrain morphology      | 0.50  |
|               |      |           |                      |                           | HP:0000729 | Autistic behavior                        | 0.50  |
|               |      |           |                      |                           | HP:0001252 | Muscular hypotonia                       | 0.62  |
| <b>SCN2A</b>  | 0.90 | 7         | 0.04                 | 8                         | HP:0002011 | Morphological abnormality of the CNS     | 0.75  |
|               |      |           |                      |                           | HP:0012639 | Abnormality of nervous system morphology | 0.75  |
|               |      |           |                      |                           | HP:0003808 | Abnormal muscle tone                     | 0.62  |
|               |      |           |                      |                           | HP:0011804 | Abnormal muscle physiology               | 0.62  |
|               |      |           |                      |                           | HP:0003011 | Abnormality of the musculature           | 0.62  |

|               |                          |      |      |   |            |                                       |      |
|---------------|--------------------------|------|------|---|------------|---------------------------------------|------|
| <b>SCN8A</b>  | 0.84                     | 7    | 0.14 | 5 | HP:0002069 | Generalized tonic-clonic seizures     | 1.00 |
|               |                          |      |      |   | HP:0003593 | Infantile onset                       | 0.80 |
|               |                          |      |      |   | HP:0007359 | Focal-onset seizure                   | 0.80 |
|               |                          |      |      |   | HP:0002384 | Focal impaired awareness seizure      | 0.60 |
|               |                          |      |      |   | HP:0002133 | Status epilepticus                    | 0.60 |
|               |                          |      |      |   | HP:0001252 | Muscular hypotonia                    | 0.60 |
| <b>CDKL5</b>  | 0.86                     | 8    | 0.04 | 4 | HP:0410280 | Pediatric onset                       | 1.00 |
|               |                          |      |      |   | HP:0011097 | Epileptic spasms                      | 1.00 |
|               |                          |      |      |   | HP:0011196 | EEG with focal sharp waves            | 0.75 |
|               |                          |      |      |   | HP:0003593 | Infantile onset                       | 0.75 |
|               |                          |      |      |   | HP:0002521 | Hypsarrhythmia                        | 0.75 |
|               |                          |      |      |   | HP:0012469 | Infantile spasms                      | 0.75 |
|               |                          |      |      |   | HP:0007270 | Atypical absence seizure              | 0.50 |
|               |                          |      |      |   | HP:0010819 | Atonic seizures                       | 0.50 |
| <b>KCNQ2</b>  | 0.84                     | 8    | 0.01 | 9 | HP:0002121 | Absence seizure                       | 0.50 |
|               |                          |      |      |   | HP:0001298 | Encephalopathy                        | 0.56 |
|               |                          |      |      |   | HP:0001263 | Global developmental delay            | 0.78 |
|               |                          |      |      |   | HP:0010818 | Generalized tonic seizures            | 0.56 |
|               |                          |      |      |   | HP:0001252 | Muscular hypotonia                    | 0.44 |
|               |                          |      |      |   | HP:0000152 | Abnormality of head or neck           | 0.33 |
|               |                          |      |      |   | HP:0012759 | Neurodevelopmental abnormality        | 0.89 |
|               |                          |      |      |   | HP:0012758 | Neurodevelopmental delay              | 0.78 |
| <b>NEXMIF</b> | 0.89                     | 8    | 0.08 | 4 | HP:0001288 | Gait disturbance                      | 0.22 |
|               |                          |      |      |   | HP:0002123 | Generalized myoclonic seizures        | 1.00 |
|               |                          |      |      |   | HP:0010819 | Atonic seizures                       | 0.75 |
|               |                          |      |      |   | HP:0001249 | Intellectual disability               | 0.75 |
|               |                          |      |      |   | HP:0010850 | EEG with spike-wave complexes         | 0.75 |
|               |                          |      |      |   | HP:0012758 | Neurodevelopmental delay              | 1.00 |
|               |                          |      |      |   | HP:0011446 | Abnormality of higher mental function | 0.75 |
| HP:0007270    | Atypical absence seizure | 0.50 |      |   |            |                                       |      |
|               |                          |      |      |   | HP:0011196 | EEG with focal sharp waves            | 0.50 |

**Table S12. HPO terms required to reach a positive predictive value (PPV) of at least 80% for genetic etiologies with more than three individuals in the cohort**

Genetic etiologies with more than three patients in the cohort were found to require 4-8 terms to reach a PPV of at least 80%. HPO terms were selected by taking terms that were had the highest odds ratio (i.e. the most common term within those individuals with the genetic etiology as compared to the rest of the cohort). Frequency of each term within individuals with the genetic etiology is displayed.
